# Supplementary material for: An integrative taxonomic revision of slug-eating snakes (Squamata: Pareidae: Pareineae) reveals unprecedented diversity in Indochina
Source: PubMed Central journal article supplement (PMC8757378; doi:10.7717/peerj.12713), 2022-01-10
Supplement: peerj-10-12713-s019.pdf [file peerj-10-12713-s019.pdf]

## SEQUENCES OF PAREINAE

### NEWLY GENERATED FOR THE PRESENT STUDY

(NB: For each sequence the GenBank Accession Number, museum voucher ID and the species name is provided, for details see Supplementary Table S1).

#### *cyt b* mtDNA gene

>MZ712215\_NMNH05625\_[Pareas\_komaii]

ATGTTTCACCAACACACACTAAAACCATTTAACCTCCTACCCGTAAGCACAAACATTTCA  
ACCTGGTGAAATTCGGGTCTATGTTATTAACCTGCCTAGTAATCCAGACCATAACCGGA  
CTCTTTCTAGCCATACACTACACAGCCGACATCAACATAGCATTCTCATCCATCATCCAC  
ATTACCCGAGATGTGCCCCACGGATGGGTCATACAAAACACACACGCCATTGGAGCCTCA  
TTATTCTTTATCTGCGTCTACACCCATGTCGCACGTGGCCTCTATTACGGCTCCTACCTA  
AATAAAGAAGTTTGAATAACAGGTACAACCCTAATAATCACCTAATAGCAACCGCCTTC  
TTTGGCTATGTGTTACCATGAGGACAAATATCATTCTGAGCAGCAACAGTTATCACAAAC  
CTACTAACCGCTGTGCCCTACTTAGGTAACACTCTAACCCACTGACTCTGAGGCGGCTTT  
GCCATTAACAGCCCAACCCTTACTCGATTCTTTGCCCTACACTTCATTCTGCCATTCACT  
ATCATCGCCCTAACCTCAATCCACATCATCTTACTACACAACCACGGCTCCAGCAACCCG  
CTGGGGACCAACTCAGATATTGATAAAATCCCATTCCACCCCTATCACTCCCACAAAGAC  
CTCCTACTAATATCTCTACTAATTACCATCCTACTGTTAGCCATATCATTTTTCCCAAAT  
ATACTCAACGACCCAGAAAATTCTCTAAAGCCAACCCACTGGTCACACCACAACACATC  
AAACCCGAGTGATACTTTCTATTTGCTTATGGAATTCTCCGCTCAGTTCCAAATAAATTA  
GGAGGGGCGTTGGCCTTGGTTTTAGCCATTTGCATCCTCCTCACAACACCATTTACCCAC  
ACAAGCTACATCCGATCAATATCCTTCCGTCCAATAGCCCAAATAGCATTTTGAACCCTC  
ATTACCACCTTCATCACCCCTCACATGAGCAGCAACCAAACCCGTAGAAACCCCTTACACA  
ACTATCGGCCAAATTGCCTCATTCTGTACTTCTCATTCTTTGCTATTAACCCAATACTG  
GGTTGACTAGAAAATAAAACCCTAAAAACCCTAACTGC

>MZ712216\_NMNH05654\_[Pareas\_iwasakii]

CTACCCGTGAGCACAAACATTTCAACCTGGTGAAATTTCCGGATCTATGTTATTAACCTGC  
TTAATAATCCAAACCATAACCGGATTTTTCTAGCCATACACTACACAGCCAACATCAAC

ACGGCATTCTCATCCATCATCCACATCACCCGAGATGTGCCCCACGGGTGGGTACATA  
AACACACACGCCATTGGGGCCTCCTTGTCTTTATCTGCGCCTACACCCATATTGCACGA  
GGTATTTACTACGGCTCCTACCTAAATAAAGAAGTCTGAATAACAGGTACAACACTAATA  
ATCACCCTAATAGCAACTGCCTTCTTTGGCTACGTGTTACCATGAGGACAAATATCGTTC  
TGAGCAGCAACAGTTATCACAACCTGCTAACCGCTGTACCCTACTTAGGTAACACCCTA  
ACCACTTGACTTTGGGGTGGTTTTGCCATTAACGACCCAACCCTTACTCGATTCTTTGCC  
CTACATTTTATTCTACCATTTACTATCGTCGCCTTAACCTCAACCCACGTCATCTTACTA  
CACAACCAAGGCTCCAGTAACCCATTAGGCACCAACTCAGACATTGATAAAATCCCATT  
CACCCCTACCACTCCTACAAAGACCTCTTACTAATAACCACACTAATTACCACCTTGTTA  
GTAATCTTAACTTTTTTCCCAAATATACTCAACGACCCAGAAAATTTCTCTAAAGCCAAC  
CCACTGGTCACACCACAACACATCAAACCCGAGTGATACTTTCTATTTGCTTATGGAATT  
CTTCGCTCAGTTCCAAATAAATTAGGAGGGGGCGTTGGCCTTGGTTTTAGCCGTTTGTATC  
CTCCTCACAACACCATTACCCACACAAGCTACATCCGATCAATATCCTTCCGTCCAGTA  
GCCCAAATAGCATTTTGAACCCTCATCACCACTTCATCATCCTCACATGAGCAGCAACC  
AAACCAGTAGAGACCCCTACACAACCTATCGGCCAAGTTGCCTCATTCTGTACTTCTCA  
TTC

>MZ712217\_ZMMUNAP09759\_[Pareas\_margaritophorus]

ATGCTCCACCAACACACACTAACACTATTTAACCTACTGCCCCTAGGTTCAAACATTTCA  
ACCTGATGGAACCTTCGGTTCTATGCTAATAAATTGCCTACTAATCCAAACCCTGACCGGG  
TTATTCCTATCCATACACTATACAGCCAACATCAACATAGCATTTTCATCCATTATACAC  
ATTTCCCGAGACGTCCCATACGGATGACTCGTACAAAACACACACGCCATCGGGGCATCT  
CTATTCTTTATCTGCATCTACCCACATCGCACGCGGCTTACTACGGCTCCTATTTA  
AATAAAGAAGTCTGAATCTCGGGCACTCTCCTACTAATCACCCCTAATAGCAACAGCCTTC  
TTTGCTACGTCTACCATGAGGACAAATATCATTCTGAGCGGCAACCGTAATCACAAC  
TTATTAACCGCAGTACCATACCTAGGAAACACCCTCACCCTTGAGTGTGGGGGGGATTC  
GCCATCGACAATCCAACCTCTGACCCGATTCTTCGCCCTCCAATTCCTTCTCCATTCGGA  
CTCATCGCTATAACCTCAATCCATGTTATCCTACTACACAACGTAGGATCCAACAACCC  
CTTGGAACCAACTCAGACACCGATAAAATCCCATTCCACCCGTACCACTCCTACAAAGAC  
TTCTTACTAATAACAATACTAGTAACTAGCCTACTATTAACCCTATCCTTTTTCCCAAAC

TCACTGAATGACCCAGAAACTTCTCCAAAGCAAACCCCATTAATCACCCACAAACACATC  
AAACCAGAGTGATACTTTCTATTTGCTTACGGAATCCTCCGTTCCGTACCAGACAAACTA  
GGAGGAGTGTTGGCCTTGATCTTAGCCGTCTGTATCCTACTCACACTACCATTACCCAC  
ACTAGTCCCATCCGATCAATATCCTTCCGACCACTAGCACAAACAGCATTTTGAACCCTC  
ATCACAAACCTTTATAATCCTCACATGAACAGCCACTAAACCAGTAGAACCCCTTTACA  
ACCATCAGTCAAGCAGCCTCACTACTATACTTTTCATTTTTTGTTCGGGCCAGTCCTT  
GGACTATTAGAAAACAAAACCTAAAAACCCCTAACTGC

>MZ712218\_AUP01573\_[Pareas\_berdmorei\_berdmorei]

TTTCACCAACACATACTTATCATTATTAACCTCCTCCCTGTAAGCTCCAACATCTCAACA  
TGATGAAACTTTGGTTCAATACTTATATCCTGTTTGATAATTCAAATCATAACTGGATTC  
TTCCTAGCTATTCACTACACAGCCAACATCAACATAGCATTCTCATCCATTGTTCATATT  
TCACGAGACGTACCATACGGATGAATTATACAAAACATTCACGCCATTGGAGCCTCCCTG  
TTCTTCATTTGCATTTATATCCACATTGCACGAGGCCTCTATTACGGATCCTACTTAAAT  
AAAGAAGTATGAATATCAGGCATAATTCTTTTAATTACCCTTATAGCAACAGCCTTCTTT  
GGCTACGTCCTGCCCTGAGGACAAATATCTTTTTGAGCTGCAACAGTAATCACCAACCTA  
TTAACTGCAGTACCATATTTAGGAGTAACATTAACAACCTGGTTCTGAGGAGGATTTGCA  
ATTAACGATCCAACCCTCACTCGATTCTTTGCCCTTCACTTTATTCTACCATTGGATTA  
CTATCCTTAGCCATAATGCACATTATACTTCTACATAACGAAGGCTCTAATAACCCACTG  
GGAACAAATTCAAATATTGACAAAATCCCATTACCCCATATCACTCTTACAAAGACATT  
CTATTAGCAACCATCATAATTACCGTCTGTTTACTATTTTAACTTTTTTTCCAAATATA  
TTAAACGACCCAGAAAATTTTTCCAAAGCAAATCCATTAATCACACCTCAACACATCAAA  
CCAGAATGGTACTTTCTATTCGCTTACGGAATTCTACGATCAATTCCAAATAAACTAGGA  
GGAGCTATAGCCCTGATCTTATCCATCTGCATTCTATTCACAACACCATTTACCCACACA  
AGTTCAATCCGAACTATATCCTTTGCCCCTATAGCACAAACAATATTCTGAACCCTAATT  
ATCACCTCCATTATCATTACCTGAACAGCCACTAAAACAGTAGAACACCATTACCAT  
ATTAGCCAAATAGCCTCATTATTGTATTTCTCATATTTTCATCATTAGTCCCCTGTTAGGC  
CTAGTGAAAACAAAATAACAAAACCCAT

>MZ712219\_CAS240362\_[Pareas\_berdmorei\_berdmorei]

ACAAAATGTTACCAACACATACTTATCATTATTAACCTCCTCCCTGTAAGCTCCAAC

ATCTCAACATGATGAACTTTGGTTCAATACTTATATCCTGTCTGATAGTTCAAATCATA  
ACTGGATTCTTCCTAGCTATTCACTACACAGCCAACATCAACATAGCATTCTCATCCATT  
GTTTCATATTTACGAGACGTACCATACGGATGAATTATACAAAACATTCACGCCATTGGA  
GCCTCTCTATTCTTCATTTGCATTTATATCCACATTGCACGAGGCCTCTATTACGGATCC  
TACTTAAATAAAGAAGTATGAATATCAGGCATAATTCTTTTAATTACCCTTATAGCAACA  
GCCTTCTTTGGCTACGTCCTGCCCTGAGGACAAATATCTTTTTGAGCTGCAACAGTAATC  
ACCAACCTATTAAGTGCAGTACCATATTTAGGAGTAACATTAACAACCTGGTTCTGAGGA  
GGGTTTGCAATTAACGATCCAACCCTCACTCGATTCTTTGCCCTTCACTTTATTCTACCA  
TTCGGGTTACTATCCTTAGCCATAATGCACATTATACTTCTACATAACGAAGGCTCTAAT  
AACCCACTAGGAACAAATTCAAATATTGACAAAATCCCATTACACCCATATCACTCTTAC  
AAAGACATTCTATTAGCAACCATCATAATTACCGTCCTGTTTATTATTTTAACTTTTTT  
CCAAATATATTAACGACCCAGAAAATTTTTCCAAAGCAAATCCATTAATCACACCTCAA  
CACATCAAACCAGAATGGTACTTTCTATTGCTTACGGAATTCTACGATCAATTCCAAAT  
AAACTAGGAGGAGCTATAGCCCTAATCTTATCCATCTGCATTCTATTACAACACCATTT  
ACCCACACAAGTTCAATCCGAACATATCCTTTGCCCTATAGCACAAACAATATTCTGA  
ACCCTAATTATCACCTCCATTATCATTACCTGAACAGCCACTAAAACAGTAGAACCACCA  
TTCACCATTATTAGCCAAATAGCCTCATTATTGTATTTCTTATATTTTCATCATTAGTCCC  
CTGTTAGGTCTAGTGAAAACAAAATTACAAAACCCATATCTGCT

>MZ712220\_ZMMUR16803\_[Pareas\_berdmorei\_berdmorei]

ACAAAATGTTACACCAACACATACTTATCATTATTAACCTCCTCCCTGTAAGCTCCAAC  
ATCTCAACATGATGAACTTTGGTTCAATACTTATATCCTGTCTGATAGTTCAAATCATA  
ACTGGATTCTTCCTAGCTATTCACTACACAGCCAACATCAACATAGCATTCTCATCCATT  
GTTTCATATTTACGAGACGTACCATACGGATGAATTATACAAAACATTCACGCCATTGGA  
GCCTCTCTATTCTTCATTTGCATTTATATCCACATTGCACGAGGCCTCTATTACGGATCC  
TACTTAAATAAAGAAGTATGAATATCAGGCATAATTCTTTTAATTACCCTTATAGCAACA  
GCCTTCTTTGGCTACGTCCTGCCCTGAGGACAAATATCTTTTTGAGCTGCAACAGTAATC  
ACCAACCTATTAAGTGCAGTACCATATTTAGGAGTAACATTAACAACCTGGTTCTGAGGA  
GGGTTTGCAATTAACGATCCAACCCTCACTCGATTCTTTGCCCTTCACTTTATTCTACCA  
TTCGGGTTACTATCCTTAGCCATAATGCACATTATACTTCTACATAACGAAGGCTCTAAT

AACCCACTAGGAACAAATTCAAATATTGACAAAATCCCATTACACCCATATCACTCTTAC  
AAAGACATTCTATTAGCAACCATCATAATTACCGTCCTGTTTATTATTTAACTTTTTT  
CCAAATATATTAACGACCCAGAAAATTTTTCCAAAGCAAATCCATTAATCACACCTCAA  
CACATCAAACCAGAATGGTACTTTCTATTTCGCTTACGGAATTCTACGATCAATTCCAAT  
AAACTAGGAGGAGCTATAGCCCTAATCTTATCCATCTGCATTCTATTACAACACCATTT  
ACCCACACAAGTTCAATCCGAACTATATCCTTTGCCCCTATAGCACAAACAATATTCTGA  
ACCCTAATTATCACCTCCATTATCATTACCTGAACAGCCACTAAAACAGTAGAACCACCA  
TTCACCATTATTAGCCAAATAGCCTCATTATTGTATTTCTTATATTTTCATCATTAGTCCC  
CTGTTAGGTCTAGTGGAAAACAAAATTACAAAACCCATATCTGCT  
>MZ712221\_ZMMUR16801\_[Pareas\_berdmorei\_truongsonicus]  
TTACACCAACATACACTTATCACTATTAACCTCCTCCCTGTAAGTTCTAACATCTCAACA  
TGATGAAACTTTGGTTCAATACTTATAACCTGTCTGATAATTCAAATCATAACCGGATTT  
TTCCTAGCTATTCACTACACAGCCAACATCAACATAGCATTTTCATCCGTTATTCATATT  
TCACGAGACGTACCATACGGATGAATCATACAAAATATTCACGCCATCGGAGCCTCTCTA  
TTCTTCATTTGCATTTATATCCACATTGCACGAGGTCTCTATTACGGGTCCTACTTAAAT  
AAAGAAGTATGAATATCGGGCATAATTCTTCTAATTACCCTCATAGCAACAGCCTTCTTT  
GGTTACGTCCTGCCCTGAGGACAAATATCTTTTTGAGCTGCAACAGTAATCACCAACCTA  
TTAACTGCAGTACCATATTTAGGAGTAACATTAACAACCTGGTTCTGAGGCGGATTTGCA  
ATTAACGATCCTACCCTCACTCGATTCTTTGCCCTTCACTTTATTCTACCATTTGGATTA  
CTATCTTTAACCATAATACACATTATACTTCTTCAACGAAGGCTCTAACAATCCACTG  
GGAACAAATTCAAATATTGACAAAATCCCATTACACCCATATCACTCTTACAAAGACATT  
CTATTAGCAACCATCATAATTACCGTCCTGTTTATTATTTAACTTTTTTCCCAAATATA  
TTAAACGACCCAGAAAATTTTTCTAAAGCAAACCCATTAATCACACCTCAACACATTA  
CCAGAGTGATACTTTCTATTTCGCTTACGGAATTCTACGATCAATTCCGAATAAACTAGGT  
GGAGCTATAGCCCTAATCTTATCTATCTGCATTCTATTACAACGCCATTCACCCACACA  
AGTTCAATCCGAACTATATCCTTTGTCCTATAGCACAAACAATATTCTGAACCCTTATT  
ATCGCCTCCATTATCATTACCTGAACAGCCACTAAAACAGTAGAACCCCCATTCACTATT  
ATCAGCCAAATAGCCTCATTATTGTATTTCTCATATTTTCATCATTAGTCCCCTGTTAGGC  
CTAATAGAAAACAAAATT

>MZ712222\_ZMMUR14796\_[Pareas\_berdmorei\_truongsonicus]

TTACACCAACATACACTTATCACTATTAACCTCCTCCCTGTAAGTTCTAACATCTCAACA  
TGATGAAACTTTGGTTCAATACTTATAACCTGTCTGATAATTCAAATCATAACCGGATTT  
TTCCTAGCTATTCACTACACAGCCAACATCAACATAGCATTTTCATCCGTTATTCATATT  
TCACGAGACGTACCATACGGATGAATCATACAAAAATATTCACGCCATCGGAGCCTCTCTA  
TTCTTCATTTGCATTTATATCCACATTGCACGAGGTCTCTATTACGGGTCTACTTAAAT  
AAAGAAGTATGAATATCGGGCATAATTCTTCTAATTACCCTCATAGCAACAGCCTTCTTT  
GGTTACGTCCTGCCCTGAGGACAAATATCTTTTTGAGCTGCAACAGTAATCACCAACCTA  
TTAACTGCAGTACCATATTTAGGAGTAACATTAACAACCTGGTTCTGAGGCGGATTTGCA  
ATTAACGATCCTACCCTCACTCGATTCTTTGCCCTTCACTTATTCTACCATTTGGATTA  
CTATCTTTAACCATAATACACATTATACTTCTTCACAACGAAGGCTCTAACAATCCACTG  
GGAACAAATTCAAATATTGACAAAATCCCATTACACCCATATCACTCTTACAAAGACATT  
CTATTAGCAACCATCATAATTACCGTCCTGTTTATTATTTTAACTTTTTTCCCAAATATA  
TTAAACGACCCAGAAAATTTTTCTAAAGCAAACCCATTAATCACACCTCAACACATTA  
CCAGAGTGATACTTTCTATTCGCTTACGGAATTCTACGATCAATTCCAAATAAACTAGGT  
GGAGCTATAGCCCTAATCTTATCTATCTGCATTCTATTCACAACGCCATTCACCCACACA  
AGTTCAATCCGAACTATATCCTTTTCGTCCTATAGCACAAACAATATTCTGAACCCTTATT  
ATCGCCTCCATTATCATTACCTGAACAGCCACTAAAACAGTAGAACCCCCATTCACTATT  
ATCAGCCAAATAGCCTCATTATTGTATTTCTTATATTTTCATCATTAGTCCCCTGTTAGGC  
CTAATAGAAAACAAAATTCTAAAAACCCAT

>MZ712223\_ZMMUR137531\_[Pareas\_berdmorei\_unicolor]

CAAAAAATGTTACACCAACACATACTTATCATTATTAACCTCCTCCCTGTGAGCTTAAC  
ATCTCAACATGATGGAACCTTTGGTTCAATACTCATAACCTGCCTGATAATTCAAATCATA  
ACCGGATTTTTCTAGCTATTCACTATACAGCCAACATCAACATAGCATTTTCATCCATT  
ATTCACATTTACGAGACGTACCATACGGATGAATCATACAAAACATTCACGCCATCGGA  
GCTTCTCTATTCTTCATTTGTATTTATATCCACATTGCACGAGGCCTCTATTACGGGTCC  
TACCTAAATAAAGAAGTATGAATATCAGGCATAATTCTTCTAATTACCCTTATAGCAACA  
GCTTTCTTTGGTTATGTCCTGCCCTGAGGACAAATATCTTTTTGAGCCGCAACAGTAATT  
ACTAATCTACTAACTGCAGTACCATATTTAGGAATAACATTAACAACCTGGTTATGAGGC

GGATTTGCAATTAACGATCCAACCCTCACTCGATTCTTTGCCCTTCACTTTATCCTACCA  
TTTGGATTACTATCTCTAACCACAATACACATTATACTTCTTCACAACAAAGGATCTAAT  
AACCCACTGGGAACAAATTCAAATATTGACAAAATCCCATTACACCCATATCACTCTTAC  
AAAGATATTCTATTAGCAACCACCTTAATTAAGTGTCTGTTTATTATTTAACCTTTTTT  
CCAAATACACTAAACGACCCAGAAAATTTTTCCAAGGCAAATCCATTAATCACACCTCAA  
CACATTAACCAGAGTGATACTTCTATTTCGCTTACGGAATTCTACGATCGATTCCAAT  
AAATTAGGCGGAGCTATAGCCCTAGTCTTATCTATTTTCATTCTATTACAAACACCATTC  
ACCCATACAAGTTCAATCCGAACTATATCCTTTGCCCTATAGCACAAACAATATTCTGA  
ACTCTCATTATCACCTCCATTATCATTACCTGAACAGCCACTAAAACAGTAGAACCCCA  
TTCATTTTTATCAGCCAAATAGCCTCATTACTGTATTTCTCATATTTTCATCATTAGTCCA  
CTGCTAGGCCTAATGGAAAACAAAATTCTAAAAACCCCAATCTGCT

>MZ712224\_ZMMUR137532\_[Pareas\_berdmorei\_unicolor]

CCAAAAATGTTACACCAACACATACTTATCATTATTAACCTCCTCCCTGTGAGCTCTAAC  
ATCTCAACATGATGGAACCTTGGTTCAATACTCATAACCTGCCTGATAATTCAAATCATA  
ACCGGATTTTTCTAGCTATTCCTATACAGCTAACATCAACATAGCATTTTCATCCATT  
ATTCACATTTACGAGACGTACCATACGGATGAATCATACAAAACATTCACGCCATCGGA  
GCTTCTCTATTCTTCATTTGCATCTATATCCACATTGCACGAGGCCTCTATTACGGGTCC  
TACCTAAATAAAGAAGTATGAATATCAGGCATAATTCTTCTAATTACCCTTATAGCAACA  
GCTTTCTTTGGTTATGTCTGCCCTGAGGACAAATATCTTTTTGAGCCGCAACAGTAATT  
ACTAATCTACTAACTGCAGTACCATATTTAGGAATAACATTAACAACCTGGTTGTGAGGC  
GGATTTGCAATTAACGATCCAACCCTCACTCGATTCTTTGCCCTTCACTTTATCCTACCA  
TTTGGATTACTATCTCTAACCATAATACACATTATACTTCTTCACAACAAAGGATCTAAT  
AACCCACTGGGAACAAATTCAAATATTGACAAAATCCCATTACACCCATATCACTCTTAC  
AAAGATATTCTATTAGCAACCATCTTAATTAAGTGTCTGTTTATTATTTAACCTTTTTT  
CCAAATATATTAACGACCCAGAAAATTTTTCCAAGGCAAACCCATTAATCACACCTCAA  
CACATTAACCAGAGTGATACTTCTATTTCGCTTACGGAATTCTACGATCAATTCCAAT  
AAATTAGGCGGAGCTATAGCCCTAGTCTTATCTATTTTCATTCTATTACAAACACCATTC  
ACCCATACAAGTTCAATCCGAACTATATCCTTTGCCCTATAGCACAAACAATATTCTGA  
ACTCTCATTATCACCTCCATTATCATTACCTGAACAGCCACTAAAACAGTAGAACCCCA

TTCATTTTTATCAGCCAAATAGCCTCATTACTATATTTCTCATATTTTCATCATTAGTCCA  
CTGCTAGGCCTAATGGAAAACAAAATTCTAAAAACCCCAATCTGCT

>MZ712225\_ZMMUR14013\_[Pareas\_berdmorei\_unicolor]

CAAAAAATGTTACACCAACACATACTTATCATTATTAACCTCCTCCCTGTGAGCTCTAAC  
ATCTCAACATGATGGAACCTTGGTTCAATACTCATAACCTGCCTGATAATTCAAATCATA  
ACCGGATTTTTCTAGCTATTTCACTATAACAGCCAACATCAACATAGCATTTCATCCATT  
ATTCACATTTACGAGACGTACCATACGGATGAATCATACAAAACATTCACGCCATCGGA  
GCTTCTCTATTCTTCATTTGTATTTATATCCACATTGCACGAGGCCTCTATTACGGGTCC  
TACCTAAATAAAGAAGTATGAATATCAGGCATAATTCTTCTAATTACCCTTATAGCAACA  
GCTTTCTTTGGTTATGTCCTGCCCTGAGGACAAATATCTTTTTGAGCCGCAACAGTAATT  
ACTAATCTACTAACTGCAGTACCATATTTAGGAATAACATTAACAACCTGGTTATGAGGC  
GGATTTGCAATTAACGATCCAACCCTCACTCGATTCTTTGCCCTTCACTTTATCCTACCA  
TTTGGATTACTATCTCTAACCACAATACACATTATACTTCTTACAACAAAGGATCTAAT  
AACCCACTGGGAACAAATTCAAATATTGACAAAATCCCATTACACCCATATCACTCTTAC  
AAAGATATTCTATTAGCAACCACCTTAATTACTGTCCTGTTTATTATTTAACCTTTTTT  
CCAAATATACTAAACGACCCAGAAAATTTTTCCAAGGCAAATCCATTAATCACACCTCAA  
CACATTAACCAGAGTGATACTTCTATTCGCTTACGGAATTCTACGATCGATTCCAAT  
AAATTAGGCGGAGCTATAGCCCTAGTCTTATCTATTTTCATTCTATTCAACACCATTC  
ACCCATACAAGTTCAATCCGAACTATATCCTTTGCCCTATAGCACAAACAATATTCTGA  
ACTCTCATTATCACCTCCATTATCATTACCTGAACAGCCACTAAAACAGTAGAACCCCA  
TTCATTTTTATCAGCCAAATAGCCTCATTACTGTATTTCTCATATTTTCATCATTAGTCCA  
CTGCTAGGCCTAATGGAAAACAAAATTCTAAAAACCCCAATCTGCT

>MZ712226\_ZMMUR14263\_[Pareas\_berdmorei\_unicolor]

CAAAAAATGTTACACCAACACATACTTATCATTATTAACCTCCTCCCTGTGAGCTCTAAC  
ATCTCAACATGATGGAACCTTGGTTCAATACTCGTAACCTGCCTGATAATTCAAATCATA  
ACCGGATTTTTCTAGCTATTTCACTATAACAGCCAACATCAACATAGCATTTCATCCATT  
ATTCACATTTACGAGACGTACCATACGGATGAATCATACAAAACATTCACGCCATCGGA  
GCTTCTCTATTCTTCATTTGCATTTATATCCACATTGCACGAGGCCTCTATTACGGGTCC  
TACCTAAATAAAGAAGTATGAATATCAGGCATAATTCTTCTAATTACCCTTATAGCAACA



GCTTTCTTTGGTTATGTCCTGCCCTGAGGACAAATATCTTTTTGAGCCGCAACAGTAATT  
ACTAATCTACTAACTGCAGTACCATATTTAGGAATAACATTAACAACCTGGTTATGAGGC  
GGATTTGCAATTAACGATCCAACCCTCACTCGATTCTTTGCCCTTCACTTTATCCTACCA  
TTTGGATTACTATCTCTAACCACAATACACATTATACTTCTTCACAACAAAGGATCTAAT  
AACCCACTGGGAACAAATTCAAATATTGACAAAATCCCATTACACCCATATCACTCTTAC  
AAAGATATTCTATTAGCAACCACCTTAATTACTTTCTGTTTATTATTTAACCTTTTTT  
CCAAATATATTAACGACCCAGAAAATTTTTCCAAGGCAAACCCATTAATCACACCTCAA  
CACATTAACCAGAGTGATACTTCTATTCGCTTACGGAATTCTACGATCGATTCCAAT  
AAATTAGGCGGAGCTATAGCCCTAGTCTTATCTATTTCCATTCTATTCACAACACCATT  
ACCCATACAAGTTCAATCCGAACCTATATCCTTTGCCCTATAGCACAAACAATATTCTGA  
ACTCTCATTATCACCTCCATTATCATTACCTGAACAGCCACTAAAACAGTAGAACCCCA  
TTCATTTTTATCAGCCAAATAGCCTCATTACTGTATTTCTCATATTTATCATTAGTCCA  
CTGCTAGGCCTAATGGAAAACAAAATTCTAAAAACCCCAATCTGCT

>MZ712227\_ZMMUR14421\_[Pareas\_berdmorei\_unicolor]

CCACAAATGTTACACCAACACATACTTATCATTATTAACCTCCTCCCTGTGAGCTCTAAC  
ATCTCAACATGATGGAACCTTGGTTCAATACTCGTAACCTGCCTGATAATTCAAATCATA  
ACCGGATTTTTCTAGCTATTTACTATACAGCCAACATCAACATAGCATTTCATCCATT  
ATTCACATTTACGAGACGTACCATACGGATGAATCATACAAAACATTCACGCCATCGGA  
GCTTCTCTATTCTTCATTTGCATTTATATCCACATTGCACGAGGCCTCTATTACGGGTCC  
TACCTAAATAAAGAAGTATGAATATCAGGCATAATTCTTCTAATTACCCTTATAGCAACA  
GCTTTCTTTGGTTATGTCCTGCCCTGAGGACAAATATCTTTTTGAGCCGCAACAGTAATT  
ACTAATCTACTAACTGCAGTACCATATTTAGGAATAACATTAACAACCTGGTTATGAGGC  
GGATTTGCAATTAACGATCCAACCTCACTCGATTCTTTGCCCTTCACTTTATCCTACCA  
TTTGGATTACTATCTCTAACCACAATACACATTATACTTCTTCACAACAAAGGATCTAAT  
AACCCACTGGGAACAAATTCAAATATTGACAAAATCCCATTACACCCATATCACTCTTAC  
AAAGATATTCTATTAGCAACCACCTTAATTACTGTCCTGTTTATTATTTAACCTTTTTT  
CCAAATATATTAACGACCCAGAAAATTTTTCCAAGGCAAACCCATTAATCACACCTCAA  
CACATTAACCAGAGTGATACTTCTATTCGCTTACGGAATTCTACGATCGATTCCAAT  
AAATTAGGCGGAGCTATAGCCCTAGTCTTATCTATTTCCATTCTATTCACAACACCATT

ACCCATACAAGTTCAATCCGAACTATATCCTTTGCCCCTATAGCACAAACAATATTCTGA  
ACTCTCATTATCACCTTCATTATCATTACCTGAACAGCCACTAAAACAGTAGAACCCCA  
TTCATTTTTATCAGCCAAATAGCCTCATTACTGTATTTCTCATATTTTCATCATTAGTCCA  
CTGCTAGGCCTAATGGAAAACAAAATTCTAAAAACCCCAATCTGCT

>MZ712228\_SIEZC20216\_[Pareas\_berdmorei\_unicolor]

CCAAAAATGTCACACAAACACATACTTACCATTATTAACCTCCTCCCTGTGAGCTCTAAC  
ATCTCACCATGATGAAACTTTGGTTCAATGCTCATAACCTGTCTGATAATTCAAATCATA  
ACTGGATTTTTCTAGCTATTCACTATACAGCCAACATCAACATAGCATTTTCATCCATT  
ATTCACATTTACGAGACGTGCCATACGGATGAATCATACAAAATATTCACGCCATCGGA  
GCTTCTCTATTCTTCATTTGCATTTATATCCACATTGCACGAGGCCTCTATTACGGGTCC  
TACCTAAATAAAGAAGTATGAATATCAGGCATAATTCTTCTAATTACCCTTATAGCAACA  
GCTTTCTTTGGTTACGTCCTGCCCTGAGGACAAATATCTTTTTGAGCCGCAACAGTAATT  
ACTAATCTACTAACTGCAGTACCATATTTAGGAATAACATTAACATCCTGGTTATGAGGC  
GGATTTGCAATTAACGATCCAACCCTCACTCGATTCTTTGCCCTTCACTTTATTCTACCA  
TTTGGGTACTATCTCTAACTATAATACACATTTTACTTCTCACAACGAAGGGTCTAAT  
AATCCACTGGGAACAAATTCAAATATTGACAAAATCCCATTACACCCATACCACTCTTAC  
AAAGATATTCTATTAGCAACCACTTTAATTACTGTCCTATTTATTATTTAACCTTTTTT  
CCAAATATATTAACGACCCAGAAAATTTCTCCAAGGCAAACCCACTAATCACACCTCAA  
CACATTAACCAGAATGATACTTCTATTGCTTACGGAATTCTACGGTCAATTCCAAT  
AAATTAGGCGGAGCTATAGCCCTGCTTATCTATTTTCATTCTATTACAAACACCATTC  
ACCCATACAAGTTCAATCCGAACTATATCATTTCGCCCTATAGCACAAACAATATTCTGA  
ACTCTCATTATCACCTCCATTATCATTACCTGAACAGCCACTAAAACAGTAGAACCCCA  
TTCATTATTATCAGCCAAATAGCCTCATTATTGTATTTCTCATATTTTCATCATTAGTCCA  
CTGCTAGGCCTAATGGAAAACAAA

>MZ712229\_ZMMUR136791\_[Pareas\_berdmorei\_unicolor]

CCAAAAATGTCACACAAACACATACTTACCATTATTAACCTCCTCCCTGTGAGCTCTAAC  
ATCTCAACATGATGGAACCTTTGGTTCAATACTCGTAACCTGCCTGATAATTCAAATCATA  
ACCGGATTTTTCTAGCTATTCACTATACAGCCAACATCAACATAGCATTTTCATCCATT  
ATTCACATTTACGAGACGTACCATACGGATGAATCATACAAAACATTACGCCATCGGA

GCTTCTCTATTCTTCATTTGCATTTATATCCACATTGCACGAGGCCTCTATTACGGGTCC  
TACCTAAATAAAGAAGTATGAATATCAGGCATAATTCTTCTAATTACCCTTATAGCAACA  
GCTTTCTTTGGTTATGTCCTGCCCTGAGGACAAATATCTTTTTGAGCCGCAACAGTAATT  
ACTAATCTACTAACTGCAGTACCATATTTAGGAATAACATTAACAACCTGGTTATGAGGC  
GGATTTGCAATTAACGATCCAACCTCTCACTCGATTCTTTGCCCTTCACTTTATCCTACCA  
TTTGGATTACTATCTCTAACCACAATACACATTATACTTCTTCAACAACAAGGATCTAAT  
AACCCACTGGGAACAAATTCAAATATTGACAAAATCCCATTACACCCATATCACTCTTAC  
AAAGATATTCTATTAGCAACCACCTTAATTACTGTCCTGTTTATTATTTAACCTTTTTT  
CCAAATATATTAACGACCCAGAAAATTTTTCCAAGGCAAACCCATTAATCACACCTCAA  
CACATTAACCAGAGTGATACTTCTATTGCTTACGGAATTCTACGATCGATTCCAAT  
AAATTAGGCGGAGCTATAGCCCTAGTCTTATCTATTTCCATTCTATTCACAACACCATT  
ACCCATACAAGTTCAATCCGAACTATATCCTTTGCCCTATAGCACAAACAATATTCTGA  
ACTCTCATTATCACCTCCATTATCATTACCTGAACAGCCACTAAAACAGTAGAACCCCA  
TTCATTTTTATCAGCCAAATAGCCTCATTACTGTATTTCTCATATTTTCATCATTAGTCCA  
CTGCTAGGCCTAATGGAAAACAAA

>MZ712230\_ZMMUR136792\_[Pareas\_berdmorei\_unicolor]

CCAAAAATGTCACACAAACACATACTTACCATTATTAACCTCCTCCCTGTGAGCTCTAAC  
ATCTCAACATGATGAACTTTGGTTCAATGCTCATAACCTGTCTGATAATTCAAACCATA  
ACTGGATTTTTCTAGCTATTCACTACACAGCCAACATCAACATAGCATTTTTCATCCATT  
ATTCACATTTACGAGACGTACCATACGGATGAATCATACAAAATATTCAGCCATCGGA  
GCCTCTCTATTCTTCATTTGCATTTATATCCACATTGCACGAGGCCTCTATTACGGGTCC  
TACCTAAATAAAGAAGTATGAATATCAGGCATAATTCTTCTAATTACCCTTATAGCAACA  
GCTTTCTTTGGTTACGTCCTGCCCTGAGGACAAATATCTTTTTGAGCCGCAACAGTAATC  
ACTAATCTATTAACCTGCAGTACCATATTTAGGAATAACATTAACAACCTGGTTATGAGGC  
GGATTTGCAATTAACGATCCGACCCTCACTCGATTCTTTGCCCTTCACTTTATTCTACCA  
TTTGGATTACTATCTCTAACCATAATACACATTATACTTCTTCAACAACGAAGGATCTAAT  
AACCCACTGGGAACAAATTCAAATATTGACAAAATCCCATTACACCCATATCACTCTTAC  
AAAGATATTCTATTAGCAACCACCTTAATTACTGTCCTGTTTATTATTTAACCTTTTTT  
CCAAATATATTAACGACCCAGAAAATTTTTCCAAGGCAAACCTCATTAAATCACACCTCAA

CACATTAACCAGAGTGATACTTCCTATTCGCTTACGGAATTCTACGATCGATTCCAAAT  
AAATTAGGCGGAGCTATAGCCCTAGTCTTATCTATTTTCATTCTATTACAAACACCATTC  
ACCCATACAAGTTCAATCCGAACTATATCCTTTGCGCCTATAGCACAAACAATATTTTGA  
ACTCTCATTATCACCTCCATTATCATTACCTGAACAGCCACTAAAACAGTAGAACCCCCA  
TTCATTATTATCAGCCAAATAGCCTCATTATTGTATTTCTCATATTTTCATCATTAGTCCA  
CTGCTAGGCCTAATGGAAAACAAA

>MZ712231\_ZMMUR14165\_[Pareas\_berdmorei\_unicolor]

CCAAACATGTCACACCAACACATACTTATCATTATTAACCTCCTCCCTGTGAGCTCTAAC  
ATCTCAACATGATGAACTTTGGTTCAATGCTCATAACCTGTCTGATAATTCAAACCATA  
ACTGGATTTTTCTAGCTATTCCTACACAGCCAACATCAACATAGCATTTCATCCATT  
ATTCACATTTACGAGATGTACCATACGGATGAATCATACAAAATATTCACGCCATCGGA  
GCCTCTCTATTCTTCATTTGCATTTATATCCACATTGCACGAGGCCTCTATTACGGGTCT  
TACCTAAATAAAGAAGTGTGAATATCAGGCATAATTATTCTAATTACCCTTATAGCAACA  
GCTTTCTTTGGTTACGTCCTGCCATGAGGACAAATATCTTTTGGAGCCGCAACAGTAATC  
ACTAATCTATTAAGTGCAGTACCATATTTAGGAATAACACTAACAACCTGGTTATGAGGC  
GGATTTGCAATTAACGATCCAACCCTCACTCGATTCTTTGCCCTTCACTTTATTCTACCA  
TTTGGGTTACTATCTCTAACTATAATACACATTTTACTTCTTCACAACGAAGGGTCTAAT  
AATCCACTGGGAACAAATTCAAATATTGACAAAATCCCATTACACCCATACCACTCTTAC  
AAAGATATTCTATTAGCAACCACTTTAATTACTGTCCTATTTATTATTTAACCTTTTTT  
CCAAATATATTAACGACCCAGAAAATTTCTCCAAGGCAAACCCACTAATCACACCTCAA  
CACATTAACCAGAATGATACTTCCTATTCGCTTACGGAATTCTACGGTCAATTCCAAAT  
AAATTAGGCGGAGCTATAGCCCTGCTCTTATCTATTTTCATTCTATTACAAACACCATTC  
ACCCATACAAGTTCAATCCGAACTATATCATTTCGCCCTATAGCACAAACAATATTCTGA  
ACTCTCATTATCACCTCCATTATCATTACCTGAACAGCCACTAAAACAGTAGAACCCCCA  
TTCATTATTATCAGCCAAATAGCCTCATTATTGTATTTCTCATATTTTCATCATTAGTCCA  
CTGCTAGGCCTAATGGAAAACAAA

>MZ712232\_ZMMUR16802\_[Pareas\_kuznetsovorum]

TACAAAATGTCACACCAACACACACTAACTATTATTAACCTCCTCCTGTAAGCTCTAAT  
ATCTCAACCTGATGAACTTTGGTTCAATACTTATAACCTGTTAATAATTCAAATCATA

ACCGGATTTTTCTAGCTATTCATTACACAGCCAACATCAACATAGCATTTCATCCATT  
ATTCACATCTCACGAGATGTACCTTACGGATGAATCATACAAAACACCCACGCCATCGGA  
GCCTCTCTATTCTTTATTTGTGTCTATATTCACATTGCACGCAGCCTCTATTACGGGTCT  
TACTTAAATAAAGAGGTGTGAATATCAGGCATTATCCTCCTAATCACCCCTTATAGCAACA  
GCCTTCTTTGGTTATGTCCTACCATGAGGACAAATATCTTTTTGAGCTGCAACAGTAATC  
ACCAACCTATTAACCGCAGTACCATATCTAGGGGTAACATTAACAACCTTGGTTCTGGGGG  
GGATTTGCAATCAACGACCCAACCCTTACTCGATTTTTTGCTCTTCACTTTATCATGCCA  
TTTGGATTACTATCTTTAACCATAATTCATATTATACTTCTACACAACGAAGGCTCTAAC  
AACCCACTAGGTAATAATTCAAATATCGACAAAATCCCTTACACCCATACCACTCCTAC  
AAAGACACCCTATTGGCAACCATCTTAATTACTACCCTATTTATTATTTTAACATTCTTT  
CCAAACATCTTAAACGATCCAGAAAATTTCTCAAAGCCAACCCCCTAATCACACCACAA  
CACATTAACCAGAATGATACTTTTTATTTGCTTACGGAATTCTACGATCAATCCCTAAT  
AAATTAGGCGGGGCCCTAGCCTTAGTCTTATCTATTTGTATTTAATTACCACACCATT  
ACCCACACAAGCTCAATCCGATCAATATCATTTCGTCCTATAGCACAAACAATATTTTGA  
ACTCTAATTATCACCTCTATTATTATTACCTGAACTGCCACTAAAACAGTAGAACACCA  
TTTATTACTATTAGTCAAATAGCCTCATTATTATTTCTCATACTTCATCATTAGCCCA  
CTATTAGGACTGCTAGAAAACAAAATTCTAAAAACACAAACCTGCT

>MZ712233\_CAS247982\_[Pareas\_carinatus\_tenasserimicus]

TCAAAAATGTCACACCAACACATACTTACCGTTATTAATCTCCTCCCTGTAAGCTCTAAC  
ATCTCAACCTGATGAAACTTCGGCTCAATACTTATAACCTGTCTAATAATTCAAATCATG  
ACTGGATTCTCCTAGCTATTCATAACAGCCAACATCAACATAGCATTTCATCCATT  
ATTCATATCTCACGAGATGTACCATACGGATGAATCATACAAAATATTCACGCCATTGGA  
GCATCTCTGTTCTTCATTTGCATTTACATTCATATTGCACGCGGTCTTTATTACGGATCT  
TACTTAAATAAAGAAGTGTGAGTATCAGGCATCGTCCTCCTAATTACCCTCATAGCAACC  
GCCTTTTTCGGTTACGTTCTACCATGAGGACAGATATCTTTTTGAGCCGCAACAGTAATC  
ACCAACCTATTAACGAGTACCATACCTAGGAGCCACATTAACAACCTGATTCTGAGGG  
GGGTTTGAATTAACGACCCAACCTTACTCGATTCTTTGCCCTTCACTTCATTCTACCA  
TTCGGGCTACTCTTTAGCTATCATTACATTATACTTCTACACAACGAAGGGTCTAGC  
AACCCCTAGGGACAAATTCAAATATTGACAAAATCCCACTACACCCATACCACTCTTAC

AAAGACATTTTATTAGCGACTATTCTAATTACCTCCCTATTTATTATTTAACTTTTTT  
CCGAATACCTTAAACGACCCAGAAAACCTTTTCCAAAGCCAACCCACTAGTCACACCACAA  
CACATTAAACCAGAGTGGTACTTTTTATTTGCTTACGGAATCTTCGATCAATCCCTAAT  
AAGCTGGGTGGAGCCCTAGCCTTAATCTTATCCATTTGCATTTTACTTACTTCACCTTTC  
ACCCACACGAGCTCAATTTCGATCAATGTCCTCCGCCAATAGCACAAATAATATTTTGA  
GCTTTAATTACCACCTCCATTATCATTACCTGAACAGCCACTAAGACAGTAGAACCACCA  
TTCATTACCGTAAGCCAAATAACCTCCTTATTGTATTTCTCATACTTCATCATTAGTCCA  
TTATTAGGCCTAATAGAAAATAAAATTATAAAAACTCAAATATGCT

>MZ712234\_ZMMUR16800\_[Pareas\_carinatus\_tenasserimicus]

ATGTCACACCAACACACACTACCATTATTTAACCTACTCCCTGTAAGCTCTAACATCTCA  
ACCTGATGAAACTTCGGCTCAATACTTATAACCTGCCTAATAATTCAAGTCATAACTGGG  
TTCTTCCTAGCTATTCATTATACAGCCAACATCAACATAGCATTTTCATCCATTATTCAT  
ATTTACGAGATGTGCCATACGGATGAATCATACAAAATATTCACGCCATCGGAGCATCT  
CTATTCTTCATTTGCATTTACATTCATATTGCACGCGGTCTTTATTACGGGTCTTACTTA  
AATAAAGAAGTGTGAGTTTCAGGCATCATTCTACTAATTACCCTCATAGCAACCGCCTTT  
TTCGGTTATGTTCTACCATGAGGACAGATGTCTTTTTGAGCCGCAACAGTAATCACCAAC  
CTACTAACTGCAGTACCGTACCTAGGAGCTACATTAACAACCTGGTTCTGAGGGGGATT  
GCAATCAACGACCCAACCTTACTCGATTCTTTGCCCTTCACTTCATTCTACCATTTCGGA  
CTACTCTCTTTAGCTATTATTCATATTATACTTCTACACAACGAAGGGTCTAGCAACCCC  
CTAGGGACAAATTCAAATATTGACAAAATCCCACTTCATCCATACCATTCTTACAAAGAC  
ATTTTATTAGCGACTATTCTAATTACCACCCTATTTATTATTTAACTTTTTTTTCCAAAT  
ACCTTAAACGACCCAGAAAATTTTTCCAAAGCCAACCCACTAGTCACACCACAACACATT  
AAACCAGAATGGTACTTTTTATTTGCTTACGGAATCCTTCGGTCAATCCCTAATAAGCTA  
GGAGGGGCCCTAGCCCTAATCTTATCCATTTGCATTTTACTTACTACACCTTTCACCCAC  
ACAAGCTCAATCCGATCAATATCCTTCCGCCAATAGCACAAATAGTGTTTTGAACTCTA  
ATTACTACTTCCATTATCATTACCTGAACAGCCACTAAAACAGTAGAACCCCCATTATT  
ACCGTAAGCCAAATAGCCTCCTTATTGTATTTCTCATACTTCATCATTAGTCCCATACTA  
GGCCTAATGGAAAATAAAATTATAAAAAACCCCTAACT

>MZ712235\_ZMMUR16393\_[Pareas\_abros]

ACAAAAATGCCTCACCAACACGCACTTATACTAACCAACCTCCTCCTGTAAGCACTAAC  
ATCTCAACGTGGTGAACTTTGGCTCAATACTTATAACCTGCTTAGCAGTTCAAATA  
ACCGGATTCTCCTGGCCATCCACTACACAGCTGACATTAACATAGCTTTTTTCATCCGTC  
ATCCATATCTCAGAGATGTACCTTGTGGATGAATTATTCAAACACACACGCAATTGGA  
GCCTCCTTATTCTTTATCTGCATCTATATCCATATCGCACGAGGTCTTTATTACGGGTCC  
TATATAAATAAAGGAGTCTGAACTTCTGGTGTCACTTTATTAATCACCTAATAGCAACA  
GCCTTCTTTGGTTATGTGCTGCCTTGAGGACAAATATCCTTTTGAGCCGCAACAGTAATC  
ACAAACCTACTAACTGCAGTACCCTACCTGGGCAGCACACTGACAAGTTGGTTTTGAGGG  
GGATTGCAATCAATAATCCTACACTTACCGATTTTTTGCCTCCACTTTAATCTCCCT  
TTTAAATTAATCTCCATATCCTTAATCCAGATTATACTACTACACAATGAAGTTCCAGT  
AATCCACTAGGAACAAATTCAGATATTGACAAAATCCCGCTCCATCCATACCACTCTCAC  
AAAGACCTCCTCGTAATAACTATCCTTATTACCATCTTATTTACCATTATAACCTTCCTC  
CCAAACATTTTCAACGACCCAGAAACTTCTCCAAAGCCAACCCAATAATTACACCACAA  
CACATTAAACCAGAATGATATTTCTATTTGCCTACGGCGTCCTTCGAACTGTCCCAAAT  
AAATTGGGGGGTACTTTAGCCTTGGTGTATCCATCTGTGCTCATTATTATGCCATTT  
ACCCACACAAGCTCAATCCGATCAATATATTTCCGTCCTATAGCACAACAACATTCTGA  
GCCCTAATCGTCACCTCCATCACCTTACCTGAACAGCTACTAAAACAGTAGAACCACCA  
TTTACAACCATTGGTCAAGCAGCCTCATTCTATATTTCTCCTGCTTACAGTCAGTCCA  
ATACTGGGCTGACTGGAAAACAAAATCATAAAAACCTCAAACCTGCT

>MZ712236\_ZMMUR16392\_[Pareas\_abros]

ACAAAAATGCCACACCAACACGCACTTATACTAACCAACCTCCTCCTGTAAGCACTAAC  
ATCTCAACGTGGTGAACTTTGGCTCAATACTTATAACCTGCTTAGCAGTTCAAATA  
ACCGGATTCTCCTGGCCATCCACTACACAGCTGACATTAACATAGCTTTTTTCATCCGTC  
ATCCATATCTCGCGAGATGTGCCTTGTGGGTGAATTATTCAAACACACACGCAATTGGA  
GCCTCCTTATTCTTTATCTGCATCTATATCCATATCGCACGAGGTCTTTATTACGGGTCC  
TATATAAATAAAGGAGTCTGAACTTCTGGTGTCACTTTATTAATCACCTAATAGCAACA  
GCCTTCTTTGGTTATGTGCTGCCTTGAGGACAAATATCCTTTTGAGCCGCAACAGTAATC  
ACAAACCTACTAACTGCAGTACCCTACCTGGGCAGCACACTGACAAGTTGGTTTTGAGGA  
GGATTGCAATCAATAATCCTACACTTACCGATTTTTTGCCTCCACTTTATTCTCCCT

TTTATATTAATCTCCATATCCTTAATCCACATTATACTACTACACAATGAAGGTTCCAGT  
AATCCACTAGGAACAAATTCAGATATTGACAAAATCCCGCTCCATCCATACCACTCTCAC  
AAAGACCTCCTCGTAATAACTATCCTTATTACCATCTTATTTACCATTATAACCTTCCTC  
CCAAACATTTTCAACGACCCAGAAACTTCTCCAAAGCCAACCCAATAATTACACCACAA  
CACATTAAACCAGAATGATATTTCTATTTGCCTACGGCGTCCTTCGAACTGTCCCAAAT  
AAATTGGGGGGGTGCTTAGCCTTGGTGTATCCATCTGTATCCTATTATTATGCCATTT  
ACCCACACAAGCTCAATCCGATCAATATATTTCCGTCCTATAGCACAACAACATTCTGA  
GCCCTAATCGTCACCTCCATCACCTTACCTGTACAGCTACAAAAACAGTAGAACCACCA  
TTGACAACCATTGGTCAAGCAGCCTCATTCTATATTTCTCATGCTTCACAGTCAGTCCA  
ATACTGGGCTGACTGGAAAACAAAATCATAAAAACCTCAAAGTCT

>MZ712237\_ZMMUR14788\_[Pareas\_abros]

ACAAAAATGCCACACCAACACGCACTTATACTAACCAACCTCCTTCCTGTAAGCACTAAC  
ATCTCAACGTGGTGAACTTTGGCTCAATACTTATAACCTGCTTAGCAGTTCAAACATA  
ACCGGATTCTTCCTGGCCATCCACTACACAGCTGACATTAACATAGCTTTTTTCATCCGTC  
ATCCATATCTCGCGAGATGTGCCTTGTGGGTGAATTATTCAAAACACACACGCAATTGGA  
GCCTCCTTATTCTTTATCTGCATCTATATCCATATCGCACGAGGTCTTTATTACGGGTCC  
TATATAAATAAAGGAGTCTGAACTTCTGGTGTCACTTTATTAATCACCTAATAGCAACA  
GCCTTCTTTGGTTATGTGCTGCCTTGAGGACAAATATCCTTTTGAGCCGCAACAGTAATC  
ACAAACCTACTAACTGCAGTACCCTACCTGGGCAGCACACTGACAAGTTGGTTTTGAGGA  
GGATTTGCAATCAATAATCCTACACTTACCGATTTTTTGCCTCCACTTTATTCTCCCT  
TTTATATTAATCTCCATATCCTTAATCCACATTATACTACTACACAATGAAGGTTCCAGT  
AATCCACTAGGAACAAATTCAGATATTGACAAAATCCCGCTCCATCCATACCACTCTCAC  
AAAGACCTCCTCGTAATAACTATCCTTATTACCATCTTATTTACCATTATAACCTTCCTC  
CCAAACATTTTCAACGACCCAGAAACTTCTCCAAAGCCAACCCAATAATTACACCACAA  
CACATTAAACCAGAATGATATTTCTATTTGCCTACGGCGTCCTTCGAACTGTCCCAAAT  
AAATTGGGGGGGTGCTTAGCCTTGGTGTATCCATCTGTATCCTATTATTATGCCATTT  
ACCCACACAAGCTCAATCCGATCAATATATTTCCGTCCTATAGCACAACAACATTCTGA  
GCCCTAATCGTCACCTCCATCACCTTACCTGTACAGCTACAAAAACAGTAGAACCACCA  
TTGACAACCATTGGTCAAGCAGCCTCATTCTATATTTCTCATGCTTCACAGTCAGTCCA



ATACTGGGCTGACTGGAAAACAAAATCATAAAAACCTCAAACCTGCT

>MZ712238\_ZMMUR13656\_[Pareas\_temporalis]

TCTCAAATGCTACACCAACACACACTTATGTTAACCAACCTCCTTCCTGTAAGCACCAAT  
ATTTCAACATGGTGAAACTTCGGCTCAATACTTATAACATGCTTAGCGATTCAAACCTGTA  
ACTGGATTTTTCTAGCCATCCACTACACAGCTGACATCAACACAGCTTTTTTCATCCATC  
ATTCATATTTACGAGATGTACCCTACGGATGAGTTATACAAAATACACACGCAATCGGA  
GCATCCCTGTTCTTCATCTGTATCTACATTCACATTGCACGAGGCCTTTATTATGGCTCC  
TACATAAATAAAGAAGTGTGAGCTTCAGGTATCACTTTATTAATTATCGTGATAGCAACA  
GCCTTCTTTGGTTATGTTCTACCGTGAGGACAAATATCATTTTGAGCCGCAACAGTAATT  
ACAAACCTATTAAGTGCAGTACCCTACCTGGGCAGCACATTAACAACCTTGATTTTGGGGG  
GGGTTTGCAATCAACAACCCACACTTACCCGATTTTTTGCACTTCACTTCATTCTCCCT  
TTTATTTAATCTCCTTATCTCTAATCCATATCATACTTCTACACAATGAAGGCTCCAGT  
AATCCACTAGGAACAAATTCAGATGTGACAAAATCCCACTACATCCATATCACTCTTAC  
AAAGACCTCCTCCTAATAACCATCCTTATTACCACTTTATTTATCATTATAACCTTTCTC  
CCAAACATTTTAAACGACCCAGAAAACCTTCTCCAAAGCCAACCCACTAGTTACACCACAA  
CACATTAAACCAGAGTGGTATTTCTATTTGCGTACAGCGTTCTCCGAACAATCCCAAAT  
AAATTAGGGGGGGCTTTAGCCTTAGTGTTATCCATCAGTATCCTATTCATTATACCATTC  
ATTCATACGAGCTCAGTTCGATCAATATCTTTCCGCCAATAGCACAATAACATTTTGA  
ACCCTAATCGTCACTTCCATTATCCTTACCTGAACAGCCACTAAAACAGTAGAACCACCA  
TTTACAACCATTGGTCAAACAGCCTCGCTCCTATACTTTTCTTACTTCATAATCAGTCCA  
GTGTTGGGTTGATTAGAGAACAAAATCATAAAAACCTCAAACGTGCT

>MZ712239\_SIEZC20215\_[Pareas\_temporalis]

TCTCAAATGCTACACCAACACACACTTATGTTAACCAACCTCCTTCCTGTAAGCACCAAT  
ATTTCAACATGGTGAAACTTCGGCTCAATACTTATAACATGCTTAGCGATTCAAACCTGTA  
ACTGGATTTTTCTAGCCATCCACTACACAGCTGACATCAACACAGCTTTTTTCATCCGTC  
ATTCATATTTACGAGATGTACCCTACGGATGAGTTATACAAAATACACACGCAATCGGA  
GCATCCCTGTTCTTCATCTGTATCTACATTCACATTGCACGAGGCCTTTATTATGGCTCC  
TACATAAATAAAGAAGTGTGAGCTTCAGGTATCACTTTATTAATTATCCTGATAGCAACA  
GCCTTCTTTGGTTATGTTCTACCGTGAGGACAAATATCATTTTGAGCCGCAACAGTAATT

ACAAACCTATTAAGTGCAGTACCCTACCTGGGCAGCACATTAACAACCTTGATTTTGGGGG  
GGGTTTGCAATCAACAACCCACACTTACCCGATTTTTTGCACCTCACTTCATTCTCCCT  
TTTATCTTAATCTCCTTATCTCTAATCCATATCATACTTCTACACAATGAAGGCTCCAGT  
AATCCACTAGGAACAAATTCAGATGTCGACAAAATCCCACTACATCCATATCACTCTTAC  
AAAGACCTCCTCCTAATAACCATCCTTATTACCACTTTATTTATCATTATAACCTTTCTC  
CCAAACATTTTAAACGACCCAGAAAACCTTCTCCAAAGCCAACCCACTAGTTACACCACAA  
CACATTAAACCAGAGTGGTATTTCTATTTGCCTACAGCGTTCTCCGAACAATCCCAAAT  
AAATTAGGGGGGGCTTTAGCCTTAGTGTTATCCATCAGTATCCTATTATTATACCATTC  
ATTACATACGAGCTCAGTTCGATCAATATCTTTCCGCCAATAGCACAATAACATTTTGA  
ACCCTAATCGTCACTTCCATTATCCTTACCTGAACAGCCACTAAAACAGTAGAACCACTA  
TTTACAACCATTGGTCAAACAGCCTCGCTCCTATACTTTTCTTACTTCATAATCAGTCCA  
GTGTTGGGTTGATTAGAGAACAAAATCATAAAAACCTCAAACGTGCT

**ND4 mtDNA gene**

>MZ712240\_NMNH05625\_[Pareas\_komaii]

GCAATCCTTTTAAACTGGGCGGATATGGTATAATCCGAATAATACAAGTTATACCAACC  
ATAAAAACAGACGTGTTTCTCCATTCTTAGTTCTAGCGCTATGAGGCGCAATTCTAGCC  
AACCTGACCTGTTTACAACAAACGGATTTGAAGTCTCTAATCGCATACTCCTCTGTTAGC  
CATATGGGTTTAGTAATCGCATCAATCACACTACAACTCAATGGGGTCTTTCCGGGGCC  
ATATCACTAATAATTGCCCATGGATTCACCTCCTCAACACTATTTTGTCTGGCCAACACC  
ACCTATGAGCGAACAACACCCGTATTTTGATCCTAACCCGTGGGTTCCACAACATCTTA  
CCAATAACTACAACCTGGTGATTAGTGGCTAATCTTATAAACATAGCTATTCCACCCAGC  
CTTAACCTCACGGGGGAGTTACTAATCGCATCCTCTATGTTCAATTGGTGTCCAACAACA  
ATTATTATATTTGGACTCTCCGTAATAATTACCGCCTTATATTCCCTACACATATTCCTA  
TCTACCCAAATAGGCACCCCTTATTAACCTCCCCACGCAACCAACACACTCACGAGAG  
CACCTACTCATGATTCTCCACACCACGCCACTTATTATAATCTCAATGAAGCCAGAACTC  
GTA

>MZ712241\_ZMMUR16628\_[Pareas\_macularius]

CTAGCAGCAATCCTCCTAAAACCTCGGGGGATACGGTTTAATCCGAATAACACAAATCCTA

CCTACTATAAAAACTGACACCTTCCTCCCGTTCTAATTCTCGCCCTCTGAGGGGCCATC  
TTAGCTAACCTGACATGCCTTCAACAAACCGACTTAAAATCCTAATCGCATACTCGTCC  
ATTAGCCACATGGGCCTGGTAATCGCATCAATCACAATCCAAACCCCCTGGGGCTTATCC  
GGGGCCATGTCTTTAATAATCGCCCACGGCTTTACCTCCTCTGCCCTATTCTGTCTAGCT  
AACACCACTTACGAACGAACAAACACCCGCATCTTAGCCCTAACCCGTGGATTCCACAAC  
ATCCTACCAATAGCTACAACCTGATGACTACTAATCAACCTTATAAACATCGCCATCCCT  
CCTAGCCTGAACTTTACAGGAGAACTATTAATTGCTTCCTCTCTATTCAACTGATCCCCA  
ATAACAATTATTATATTCGGACTTTCTATACTAATCACCGCCTCTTATTCTCTTACGTA  
TTCCTATCAACCCAAATAGGCACACCCCTATTAACCTACCGACACAACCAACACACTCA  
CGAGAGCACCTACTCATAATTCTCCACATTCTCCCCTTATTATAGTATCACTAAAGCCG  
GAACTAGTACTC

>MZ712242\_CIB098271\_[Pareas\_margaritophorus]

TTAGCAGCAATCCTGGTAAAACCTAGGGGGGTACGGCATAATCCGAATAATACAAATTCTC  
CCAACCTACAAAACCGATACCTTCCTACCCCTCCTAATTCTCGCCCTTTGGGGGGCCATC  
TTGTCCAACCTCACCTGCCTACAACAAACAGATCTAAAGTCCTAATCGCATACTCCTCT  
ATCAGCCACATGGGCCTAGTAATTGCATCAATCACGCTCCAAACCCAATGAGGCCTGTCC  
GGAGCCATATCTTAATAATCGCCCACGGCTTTACCTCCTCAGCCTTATTTTGTAGCC  
AACACCACCTACGAACGAACAAACACCCGAATCTTAGCCCTAACACGAGGATTCCACAAC  
ATCCTGCCAATAGCTACAACCTGATGACTGCTCGCTAACCTTATAAACATCGCCATCCCC  
CCAAGCCTAAATTTACAGGAGAACTACTGATTGCCTCCTCCCTATTCAATTGGTGTCCA  
ACAACAATTATTATATTCGGACTATCTATATTAATCACAGCCTCCTATTCCCTACACATA  
TTTATATCGACCCAAATAGGCACACCCCTGTAAACCTGCCACACAACCAACCCACTCA  
CGAGAACACCTACTTATAACTACACATCCTACCACTTATAATAATCTCACTAAAACCA  
GGAATTGTACTC

>MZ712243\_ZMMUNAP09759\_[Pareas\_margaritophorus]

TTAGCAGCAGTTCTACTAAAACCTGGGGGGGTACGGCTTAATCCGGATAATACAAATCCTC  
CCAACCACAAAACCGATACCTTTCTACCCCTCCTGGTTTTAGCCCTTTGGGGGGCCATC  
TTATCCAATCTAACCTGCCTACAACAAACAGATCTAAAGTCCTAATCGCATACTCCTCT  
ATCAGTCACATGGGCCTAGTAATCGCATCAATCACACTCCAAACCCAATGAGGCCTATCT

GGAGCCATGTATTTAATAATCGCCCACGGCTTTACCTCCTCAGCCTTATTTTGTCTAGCC  
AACACCACCTACGAACGAACAAACACCCGAATCCTAGCCCTAACACGAGGGTTCCACAAC  
ATCTACCAATAGCTACAACCTGATGACTATTTACTAACCTCATAAACATCGCCATCCCT  
CCAAGCCTAAATTTACAGGAGAATACTAATTGCCTCCTCCCTATTCAACTGGTGTCCA  
ACAACAATTATTATATTCGGACTATCTATGTTAATCACAGCCTCCTATTCCCTACACATA  
TTTATATCAACCCAAATAGGCACACCAGTGTTAAACCTACCCACACAACCAACCCACTCA  
CGAGAACACCTACTTATAATCCTACACATCCTGCCACTTATAATAGTCTCACTAAAACCA  
GGACTAGTACTC

>MZ712244\_AUP01573\_[Pareas\_berdmorei\_berdmorei]

TTAGCAGCAATTCTTCTAAAGCTGGGGGGTATGGACTAATACGAATAATTCAAATCATA  
CCACCAATAAAAACTAATTTATCCTACCATTCTTATTCTAGCCCTATGGGGGGCAGTT  
TTAGCCAATCTAACATGTTTACAACAAACAGACCTGAAATCTCTAATTGCATACTCATCT  
ATCAGTCACATAGGATTAGTAATCGCATCAATTCTACTACAAACCCAGTGAGGTTTATCA  
GGAGCTATATCTTTAATAATTGCCACGGTTTCACATCATCAATATTATTCTGTCTCGCT  
AATACAACCTATGAACGAACAAACACCCGCATCCTAATCTTAACACGAGGGTTTCACAAAT  
ATCCTACCAATAACTACAGCCTGATGACTTATAGCCAACCTAATAAATATTGCTATTCCA  
CCAAGCCTAAACTTTACAGGAGAATACTAATCGCATCATCTTTATTCAACTGATGCCCA  
ACTACAATAATCTTATTTGGTATATCTATGCTAATTACCATTTTCAATTCTCTACAAGTA  
TTTTTATCTACTCAGATGGGTACATCCCTATTAATACACCTACACAGCCAACACACTCA  
CGAGAACACCTACTAATAACTACACACCCTCCCTCTTATTATAATTTCAATAAAAACCA  
GAACTTGATTTT

>MZ712245\_CAS240362\_[Pareas\_berdmorei\_berdmorei]

TTAGCAGCAATTCTTCTAAAGTTGGGGGGTACGGACTAATACGAATAATTCAAATCATA  
CCACCAACAAAAACAAATTTATCCTACCATTCTTATTCTAGCCCTATGAGGGGCAGTT  
TTAGCCAATCTAACATGTCTACAACAAACAGACCTGAAATCTCTAATTGCATACTCATCT  
ATTAGTCACATAGGATTAGTAATCGCATCAATTCTACTACAAACCCAGTGAGGTTTATCA  
GGAGCTATATCTTTAATAATTGCCACGGTTTCACATCATCAATATTATTCTGTCTCGCT  
AATACAACCTATGAACGAACAAACACCCGCATCCTAATCTTAACACGAGGGTTTCACAAAT  
ATCCTACCAATAACTACAGCCTGATGACTTATAGCCAACCTAATAAATATTGCTATTCCA

CCAAGCCTAAACTTTACAGGAGA ACTACTAATTGCATCATCTTTATTCAACTGATGCCCA  
ACTACAATAATCTTATTTGGTATATCTATGCTAATTACCATTTTCATATTCTCTACAAGTA  
TTTTTATCTACTCAGATAGGTACACCCCTATTAATAACACCTACACAGCCAACACACTCA  
CGAGAACACCTACTAATAATACTACACATCCTCCCTCTTATTATAATTTCAATAAAACCA  
GAACTTGTATTT

>MZ712246\_ZMMUR16803\_[Pareas\_berdmorei\_berdmorei]

TTAGCAGCAATTCTTCTAAAGTTGGGGGGGTACGGACTAATACGAATAATTCAAATCATA  
CCACCAACAAAAACAAATTTATTCCTACCATTCCCTTATTCTAGCCCTATGAGGGGCAGTT  
TTAGCCAATCTAACATGTCTACAACAAACAGACCTGAAATCTCTAATTGCATACTCATCT  
ATTAGTCACATAGGATTAGTAATCGCATCAATTCTACTACAAACCCAGTGAGGTTTATCA  
GGAGCTATATCTTTAATAAATTGCCACGGTTTCACATCATCAATATTATTCTGTCTCGCT  
AATACAACCTATGAACGAACAAACACCCGCATCCTAATCTTAACACGAGGGTTTCACAAT  
ATCCTACCAATAACTACAGCCTGATGACTTATAGCCAACCTAATAAATATTGCTATTCCA  
CCAAGCCTAAACTTTACAGGAGA ACTACTAATTGCATCATCTTTATTCAACTGATGCCCA  
ACTACAATAATCTTATTTGGTATATCTATGCTAATTACCATTTTCATATTCTCTACAAGTA  
TTTTTATCTACTCAGATAGGTACACCCCTATTAATAACACCTACACAGCCAACACACTCA  
CGAGAACACCTACTAATAATACTACACATCCTCCCTCTTATTATAATTTCAATAAAACCA  
GAACTTGTATTT

>MZ712247\_ZMMUR16801\_[Pareas\_berdmorei\_truongsonicus]

TTAGCAGCAATCCTTCTAAAACCTGGAGGATACGGACTAATACGAATAATTCAAATCATA  
CCACCAACAAAAACAAATTTATTCCTCCCATTCCCTTATTCTAGCCCTGTGGGGGGCTGTT  
TTAGCCAATCTAACATGTTTACAACAAACAGACCTAAAATCTCTAATTGCATACTCATCT  
ATCAGCCACATAGGATTAGTAATCGCATCAATTCTACTACAAACCAAATGAGGCTTATCT  
GGGGCTATATCTTTAATAAATTGCCATGGATTACATCGTCAATGTTATTCTGTCTCGCT  
AATACAACCTATGAACGAACAAACACCCGCATTCTAATCTTAACACGAGGATTTACAAT  
ATCCTGCCAATAACTACAGCCTGATGACTTATAGCCAACCTAATAAATATTGCCATTCCA  
CCAAGCCTAAACTTTACAGGAGA ACTACTAATTGCATCATCTTTATTTAACTGATGCCCA  
ACTACAATAATCCTACTTGGCATGTCTATGCTAATTACCATTTTCATACTCCCTACAAGTA  
TTTATATCTACCCAAATAGGTACATCACTATTAATGCACCTACACAGCCAACACACTCA

CGAGAACACCTATTAATAACCCTGCACATCCTTCCTCTTATTATAATTTCAATAAAACCA  
GAACTTGATTC

>MZ712248\_ZMMUR14796\_[Pareas\_berdmorei\_truongsonicus]

TTAGCAGCAATCCTTCTAAAACCTGGAGGATACGGACTAATACGAATAATTCAAATCATA  
CCACCAACAAAAACAAATTTATTCCTCCCATTCTTATTCTAGCCCTGTGGGGGGCTGTT  
TTAGCCAATCTAACATGTTTACAACAAACAGACCTGAAATCTCTAATTGCATACTCATCT  
ATCAGCCACATAGGATTAGTAATCGCATCAATTCTACTACAAACCAAATGAGGCTTATCT  
GGGGCTATATCTTTAATAATTGCCCATGGATTCACATCGTCAATGTTATTCTGTCTCGCT  
AATACAACCTATGAACGAACAAACACCCGCATTCTAATCTTAACACGAGGATTCACAAT  
ATCCTGCCAATAACTACAGCCTGATGACTTATAGCCAACCTAATAAATATTGCCATTCCA  
CCAAGCCTAAACTTTACAGGAGAATACTAATTGCATCATCTTTATTTAACTGATGCCCA  
ACTACAATAATCCTACTTGGCATGTCTATGCTAATTACCATTTCATACTCCCTACAAGTA  
TTTATATCTACCCAAATAGGTACATCACTATTAATGCACCTACACAGCCAACACACTCA  
CGAGAACACCTATTAATAACCCTGCACATCCTTCCTCTTATTATAATTTCAATAAAACCA  
GAACTTGATTC

>MZ712249\_ZMMUR137531\_[Pareas\_berdmorei\_unicolor]

CTAGCAGCAATTCTTCTAAAACCTGGGGGGTACGGCCTAATACGAATAATTCAAATCATA  
CCACCAACAAAAACAAATTTATTCCTGCCATTCTCATTCTAGCCCTGTGGGGAGCAATT  
TTAGCCAATCTAACATGTTTACAACAAACAGACCTGAAATCTCTAATTGCATACTCATCT  
ATCAGCCACATAGGGTTAGTAATCGCATCAATTCTACTACAAACCCAGTGAGGCTTATCT  
GGGGCAATATCCTTAATAATCGCCCATGGATTCACATCGTCAATACTATTCTGTCTCGCT  
AATACAACCTATGAACGAACAAACACCCGCATTCTAATCTTAACACGAGGGTTTCACAAC  
ATCCTACCAATAACCACAGCCTGATGACTTATGGCCAACCTAATAAATATTGCCATTCCA  
CCAAGCCTAAACTTTACAGGAGAATACTAATTGCATCATCTTTATTCAACTGATGCCCA  
ACTACAATAGTCTTATTTGGCATGTCTATACTAATTACCATTTCATACTCTCTACAAGTA  
TTTATATCTACCCAGATAGGTACGTCACTATTAGATGCACCTACACAGCCAACACACTCA  
CGAGAACACCTACTAATAACTCTACACATCCTTCCCCTTATTATAATTTCAATAAAACCA  
GAACTTGATTC

>MZ712250\_ZMMUR137532\_[Pareas\_berdmorei\_unicolor]

CTAGCAGCAATTCTTCTAAAACCTGGGGGGTACGGCCTAATACGAATAATTCAAATCATA  
CCACCAACAAAAACAAATTTATTCCTGCCATTCTCATTCTAGCCCTGTGGGGAGCAATT  
TTAGCCAATCTAACATGTTTACAACAAACAGACCTGAAATCTCTAATTGCATACTCATCT  
ATCAGCCACATAGGATTAGTAATCGCATCAATTCTACTACAAACCCAGTGAGGCTTATCT  
GGGGCAATATCCTTAATAATCGCCCATGGATTACATCGTCAATACTATTCTGTCTCGCT  
AATACAACCTATGAACGAACAAACACCCGCATTCTAATCTTAACACGAGGGTTTCACAAC  
ATCCTACCAATAACACAGCCTGATGACTTATGGCCAACTTAATAAATATTGCCATTCCA  
CCAAGCCTAAACTTTACAGGAGAACTACTAATTGCATCATCTTTATTCAACTGATGCCCA  
ACTACAATAGTCTTATTTGGCATGTCTATACTAATTACCATTTCATACTCTCTACAAGTA  
TTTATATCTACCCAGATAGGTACGTCACTATTAGATGCACCTACACAGCCAACACACTCA  
CGAGAACACCTACTAATAACTCTACACATCCTTCCTCTTATTATAATTTCAATAAAACCA  
GAACTTGATTC

>MZ712251\_ZMMUR14013\_[Pareas\_berdmorei\_unicolor]

CTAGCAGCAATTCTTCTAAAACCTGGGGGGTACGGCCTAATACGAATAATTCAAATCATA  
CCACCAACAAAAACAAATTTATTCCTGCCATTCTCATTCTAGCCCTGTGGGGAGCAATT  
TTAGCCAATCTAACATGTTTACAACAAACAGACCTGAAATCTCTAATTGCATACTCATCT  
ATCAGCCACATAGGATTAGTAATCGCATCAATTCTACTACAAACCCAGTGAGGCTTATCT  
GGGGCAATATCCTTAATAATCGCCCATGGATTACATCGTCAATACTATTCTGTCTCGCT  
AATACAACCTATGAACGAACAAACACCCGCATTCTAATCTTAACACGAGGGTTTCACAAC  
ATCCTACCAATAACACAGCCTGATGACTTATGGCCAACTTAATAAATATTGCCATTCCA  
CCAAGCCTAAACTTTACAGGAGAACTACTAATTGCATCATCTTTATTCAACTGATGCCCA  
ACTACAATAGTCTTATTTGGCATGTCTATACTAATTACCATTTCATACTCTCTACAAGTA  
TTTATATCTACCCAGATAGGTACGTCACTATTAGATGCACCTACACAGCCAACACACTCA  
CGAGAACACCTACTAATAACTCTACACATCCTTCCTCTTATTATAATTTCAATAAAACCA  
GAACTTGATTC

>MZ712252\_ZMMUR14263\_[Pareas\_berdmorei\_unicolor]

CTAGCAGCAATTCTTCTAAAACCTGGGGGGTACGGCCTAATACGAATAATTCAAATCATA  
CCACCAACAAAAACAAATTTATTCCTGCCATTCTCATTCTAGCCCTGTGGGGAGCAATT  
TTAGCCAATCTAACATGTTTACAACAAACAGACCTGAAATCTCTAATTGCATACTCATCT

ATCAGCCACATAGGATTAGTAATCGCATCAATTCTACTACAAACCCAGTGAGGCTTATCT  
GGGGCAATATCCTTAATAATCGCCCATGGATTACATCGTCAATACTATTCTGTCTCGCT  
AATACAACCTATGAACGAACAAACACCCGCATTCTAATCTTAACACGAGGGTTTCACAAC  
ATCCTACCAATAACCACAGCCTGATGACTTATGGCCAACCTAATAAATATTGCCATTCCA  
CCAAGCCTAAACTTTACAGGAGAATACTAATTGCATCATCTTTATTCAACTGATGCCCA  
ACTACAATAGTCTTATTTGGCATGTCTATACTAATTACCATTTCATACTCTCTACAAGTA  
TTTATATCTACCCAGATAGGTACGTCACTATTAGATGCACCTACACAGCCAACACACTCA  
CGAGAACACCTACTAATAACTCTACACATCCTTCCTCTTATTATAATTTCAATAAAACCA  
GAACTTGATTC

>MZ712253\_ZMMUR14421\_[Pareas\_berdmorei\_unicolor]

CTAGCAGCAATTCTTCTAAAACCTGGGGGGTACGGCCTAATACGAATAATTCAAATCATA  
CCACCAACAAAAACAAATTTATTCCTGCCATTCTCATTCTAGCCCTGTGGGGAGCAATT  
TTAGCCAATCTAACATGTTTACAACAAACAGACCTGAAATCTCTAATTGCATACTCATCT  
ATCAGCCACATAGGATTAGTAATCGCATCAATTCTACTACAAACCCAGTGAGGCTTATCT  
GGGGCAATATCCTTAATAATCGCCCATGGATTACATCGTCAATACTATTCTGTCTCGCT  
AATACAACCTATGAACGAACAAACACCCGCATTCTAATCTTAACACGAGGGTTTCACAAC  
ATCCTACCAATAACCACAGCCTGATGACTTATGGCCAACCTAATAAATATTGCCATTCCA  
CCAAGCCTAAACTTTACAGGAGAATACTAATTGCATCATCTTTATTCAACTGATGCCCA  
ACTACAATAGTCTTATTTGGCATGTCTATACTAATTACCATTTCATACTCTCTACAAGTA  
TTTATATCTACCCAGATAGGTACGTCACTATTAGATGCACCTACACAGCCAACACACTCA  
CGAGAACACCTACTAATAACTCTACACATCCTTCCTCTTATTATAATTTCAATAAAACCA  
GAACTTGATTC

>MZ712254\_SIEZC20216\_[Pareas\_berdmorei\_unicolor]

CTAGCAGCAATTCTTCTAAAACCTGGGGGGTACGGCCTAATACGAATAAATCAAATCATA  
CCACCAACAAAAACAAATTTATTCCTGCCATTCTCATTCTAGCCCTGTGGGGAGCAATT  
TTAGCCAATCTAACATGTTTACAACAAACAGACCTGAAATCTCTAATTGCATACTCATCT  
ATCAGCCACATAGGATTAGTAATCGCATCAATTCTACTACAAACCCAGTGAGGCTTATCT  
GGGGCAATATCCTTAATAATCGCCCATGGATTACATCGTCAATACTATTCTGTCTCGCT  
AATACAACCTATGAACGAACAAACACCCGCATTCTAATCTTAACACGAGGGTTTCACAAC



ATCCTACCAATAACCCACAGCCTGATGACTTATGGCCAACTTAATAAATATTGCCATTCCA  
CCAAGCCTAAACTTTACAGGAGAACTACTAATTGCATCATCTTTATTCAACTGATGCCCA  
ACTACAATAGTCTTATTTGGCATGTCTATACTAATTACCATTTCATACTCTCTACAAGTA  
TTTATATCTACCCAGATAGGTACGTCACTATTAGATGCACCTACACAGCCAACACACTCA  
CGAGAACACCTACTAATAACTCTACACATCCTTCCTCTTATTATAATTTCAATAAAACCA  
GAACTTGATTC

>MZ712255\_ZMMUR136791\_[Pareas\_berdmorei\_unicolor]

CTAGCAGCAATTCTTCTAAAACCTGGGGGGTACGGCCTAATACGAATAATTCAAATCATA  
CCACCAACAAAAACAAATTTATTCCTGCCATTCTCATTCTAGCCCTGTGGGGAGCAATT  
TTAGCCAATCTAACATGTTTACAACAAACAGACCTGAAATCTCTAATTGCATACTCATCT  
ATCAGCCACATAGGATTAGTAATCGCATCAATTCTACTACAAACCCAGTGAGGCTTATCT  
GGGGCAATATCCTTAATAATCGCCCATGGATTACATCGTCAATACTATTCTGTCTCGCT  
AATACAACCTATGAACGAACAAACACCCGCATTCTAATCTTAACACGAGGGTTTCACAAC  
ATCCTACCAATAACCCACAGCCTGATGACTTATGGCCAACTTAATAAATATTGCCATTCCA  
CCAAGCCTAAACTTTACAGGAGAACTACTAATTGCATCATCTTTATTCAACTGATGCCCA  
ACTACAATAGTCTTATTTGGCATGTCTATACTAATTACCATTTCATACTCTCTACAAGTA  
TTTATATCTACCCAGATAGGTACGTCACTATTAGATGCACCTACACAGCCAACACACTCA  
CGAGAACACCTACTAATAACTCTACACATCCTTCCTCTTATTATAATTTCAATAAAACCA  
GAACTTGATTC

>MZ712256\_ZMMUR136792\_[Pareas\_berdmorei\_unicolor]

CTAGCAGCAATTCTTCTAAAACCTGGGGGGTACGGCCTAATACGAATAATTCAAATCATA  
CCACCAACAAAAACAAATTTATTCCTGCCATTCTCATTCTAGCCCTGTGGGGAGCAATT  
TTAGCCAATCTAACATGTTTACAACAAACAGACCTGAAATCTCTAATTGCATACTCATCT  
ATCAGCCACATAGGATTAGTAATCGCATCAATTCTACTACAAACCCAGTGAGGCTTATCT  
GGGGCAATATCCTTAATAATCGCCCATGGATTACATCGTCAATACTATTCTGTCTCGCT  
AATACAACCTATGAACGAACAAACACCCGCATTCTAATCTTAACACGAGGGTTTCACAAC  
ATCCTACCAATAACCCACAGCCTGATGACTTATGGCCAACTTAATAAATATTGCCATTCCA  
CCAAGCCTAAACTTTACAGGAGAACTACTAATTGCATCATCTTTATTCAACTGATGCCCA  
ACTACAATAGTCTTATTTGGCATGTCTATACTAATTACCATTTCATACTCTCTACAAGTA

TTTATATCTACCCAGATAGGTACGTCACTATTAGATGCACCTACACAGCCAACACACTCA  
CGAGAACACCTACTAATAAECTCTACACATCCTTCCTCTTATTATAATTTCAATAAAACCA  
GAACTTGATTC

>MZ712257\_ZMMUR14165\_[Pareas\_berdmorei\_unicolor]

TTAGCAGCAATTCTTCTAAAACCTGGGGGGTACGGCCTAATACGAATAATTCAAATCATA  
CCACCAACAAAAACAACTTATTCCTACCATTCTTATTCTAGCCCTATGGGGAGCAATT  
TTAGCCAATCTAACATGTTTACAACAAACAGACCTGAAATCTCTAATTGCATACTCATCT  
ATCAGCCACATAGGATTAGTAATCGCATCAATTCTACTACAAACCCAGTGAGGCTTATCT  
GGAGCAATATCCTTAATAATCGCCCATGGATTACATCGTCAATACTATTCTGTCTCGCT  
AATACAACCTATGAACGAACAAACACCCGCATTCTAGTCTTAACACGGGGGTTTCACAAC  
ATCCTACCAATAACCACAGCCTGATGACTTATGGCCAACCTAATAAATATTGCCATTCCA  
CCAAGCCTAACTTTACAGGAGAACTACTAATTGCATCATCTTTATTCAACTGATGCCCA  
ACTACAATAGTCTTATTTGGCATGTCCATACTAATTACCATTTCATACTCTCTACAAGTA  
TTTATATCTACCCAGATAGGTACATCACTATTAGATGCACCTACACAGCCAACACACTCA  
CGAGAACACCTACTAATAACCCTACACATCCTTCCTCTTATTATAATTTCAATAAAACCA  
GAACTTGACTC

>MZ712258\_ZMMUR16802\_[Pareas\_kuznetsovorum]

GTA TAGCAGCAATTCTCCTAAAACCTGGCGGATATGGTCTAATCCGAATAATTCAAATC  
ATACCACCAACAAAAACAACTTATTCCTACCATTCTTATCCTGGCCCTCTGGGGGGCA  
ATTTTAGCTAGTCTAACCTGCCTACAACAAACAGACCTAAAATCTCTAATTGCATACTCC  
TCAATCAGTCATATAGGACTAGTAATTGCATCAATCCTACTTCAAACCTCAATGGGGCTTA  
TCTGGGGCTATATATTTAATAATTGCCACGGATTACGTCATCAATATTATTCTGCCTA  
GCCAATACAACCTATGAACGAACAAACACCCGCATCCTTATACTAACACGAGGGTTTCAC  
AACATCCTACCAATAACTACAGCCTGATGACTACTAGCCAATTTAATGAACATCGCCATC  
CCACCTAGTCTCAACTTACAGGAGAATTACTAATTGCATCATCCCTGTTCAACTGGTGT  
CCAATTACAATAATCTTATTTGGCCTGTCTATACTAATTACCATCTCATATTCATTACAA  
GTATTTTTATCTACCCAAATAGGCAAAACATTATTAACACACCCACACAACCAATACAC  
ACACGAGAACATCTACTAATGACCCTCCACATCATCCCCCTTATTATAATCTCAATAAAA  
CCAGAACTTGATTC

>MZ712259\_CAS247982\_[Pareas\_carinatus\_tenasserimicus]

CTAGCAGCAATTCTTCTTAACTTGGAGGCTATGGATTAATCCGAATAATTCAATTTATA  
CCCACAACAAAAACAGATCTATTCTACCATTCTTATTATAGCCCTCTGAGGGGCAATT  
TTAGCCAGTCTAACCTGCTTGCAACAAACAGATCTAAAATCTCTAATTGCATACTCTCT  
ATTAGCCATATGGGGTTAGTAGTTGCAGCAATTCTTCTACAAACCCAGTGGGGTTTATCG  
GGGGCTATGTCTTAAAGTTGCTCATGGGTTACATCATCAATACTATTCTGTCTCGCC  
AACACAACCTATGAACGAACAAACACCCGCATCTTAATCTTAACACGAGGCTTTCATAAT  
ATCCTTCTATAACTACAGCCTGATGACTACTAGCCAACTTAATAAACATTGCTATTCCA  
CCAAGTCTTAACTTCACAGGAGAACTACTTATTGCATCGTCCCTGTTCAACTGAAGTCCA  
ACTACAATAATTTTATTCGGTTTATCTATGTTAATTACCGTTTCATACTCTCTACAAGTA  
TTTATATCCACCCAAATAGGCACCCCCCTATTAACACACCCACACAGCCAACACACTCA  
CGAGAACATCTACTTATGATCTTACACATCATTCCCCTTATTATAATCTCAATAAAACCA  
GAACTTGATTC

>MZ712260\_ZMMUR16800\_[Pareas\_carinatus\_tenasserimicus]

CTAGCAGCAATTCTTCTTAACTTGGAGGCTACGGGTTAATCCGAATAATTCAAATCATA  
CCCACAACAAAAACAGATCTTTTCTACCATTCTTATTATAGCCCTATGGGGGGCAATT  
TTAGCCAGTCTAACCTGCTTGCAACAAACAGATCTAAAATCTCTAATTGCATACTCTCT  
ATTAGCCACATAGGACTAGTAATTGCAGCAATTCTTCTACAAACTCAGTGGGGTTTATCT  
GGGGCTATATCTTAAAGTCGCTCATGGGTTACATCATCAATACTATTCTGTCTCGCC  
AACACAACCTATGAACGAACAAACACCCGCATCTTAATCTTAACACGAGGCTTCCATAAT  
ATCCTACCTATAACTACAGCCTGATGACTACTAGCCAACTTAATAAATATTGCCATTCCA  
CCAAGTCTTAACTTCACAGGAGAACTACTTATCGCATCGTCCCTATTCAACTGATGTCCA  
ACTACAATAATTTTATTTGGTTTATCTATGTTAATTACCATTTTCATACTCTCTACAAGTA  
TTTATATCCACCCAAATAGGCACCCCCCTATTAACACACCCACACAACCAACACACTCA  
CGAGAACATCTACTTATGGTCTTACACATCATTCCCCTTATCATAATCTCAATAAAACCA  
GAACTTGATTC

>MZ712261\_LSUHC10604\_[Pareas\_carinatus\_carinatus]

GCAATTCTTCTTAACTTGGAGGCTATGGATTAATCCGAATAATTCAAATTATACCTTCA  
ACAAAAACAGATCTATTCTTACCATTCTTGTATAGCCCTCTGAGGGGCAATTTAGCC

GGTTAACCTGCTTGCAACAAACAGATCTAAAATCTCTAATTGCATACTCCTCTATTAGC  
CACATAGGGCTAGTAATTGCAGCAATTCTTCTACAAACTCAGTGGGGCTTATCGGGGGCC  
ATATCTTTAATAGTTGCCCATGGGTTACATCATCAATACTATTCTGCCTCGCTAACACA  
ACCTATGAACGTACAAACACCCGCATCTTAATCTTAACACGAGGCTTTCATAATATCTTG  
CCTATAACTACAGCCTGATGACTATTAGCCAACCTAATAAACATTGCCATTCCACCAAGC  
CTTAACCTCACAGGAGAATACTAATTGCATCGTCTCTATTCAACTGATGTACAACTACA  
ATAATTTTATTTCGGTTTATCTATGTTAATTACCGTTTCATACTCCCTACAAGTATTTATA  
TCCACCCAAATAGGCACCCCCCTATTAACATACCAACACAGCCAACACACTCACGAGAA  
CATCTACTTATGATCTTACACATCATCCCCCTTATCATAATCTCAATTAACCAGAACT  
GTATTC

>MZ712262\_ZMMUR16393\_[Pareas\_abros]

CTAGCAGCAATTCTTCTAAAATTGGGGGGTTATGGCTTGATCCGAATAATACAAATTATA  
CCCACCCCAAAAACAGATATATTCACCCCTTTTCTCGTGTTAGCCCTTTGAGGGGCAATT  
TTAGCCAACCTAACTTGTCTGCAACAAACAGACCTAAAATCTTTAATCGCATACTCATCT  
ATTAGCCACATAGGCCTAGTAATCGCATCAATCATATTAGGAACCGAGTGAAGCCTATCC  
GGGGCTATATCGTTAATAATCGCCCACGGATTCACATCATCAATACTATTCTGTCTTGCC  
AATACCACCTATGAACGAACAAACACTCGCATCTTAATCCTAACACGAGGATTTCATAAC  
CTTTTACCAATGACCACAGCCTGATGATTAATAGCTAACCTGTAAACATCGCCGTACCA  
CCTAGCCTTAACTTTACAGGAGAATACTAATCGCATCATCCTTATTCAACTGATGTCCA  
ACAACAATGTTTCATATTTGGCCTCTCTATACTAATTACTGCCTCCTACTCCATACACATG  
TTTATATCTACCCAGATAGGGACACCACTACTAAACGTCTCAACACAACCAACACACTCA  
CGAGAACATCTACTTATAACCCTACACATAAGCCCTTATCCTAATCTCAATAAAACCA  
GAGCTTGTATTT

>MZ712263\_ZMMUR16392\_[Pareas\_abros]

CTAGCAGCAATTCTTCTAAAATTGGGGGGTTATGGCTTGATCCGAATAATACAAATTATA  
CCCACCCCAAAAACAGATATATTCACCCCTTTTCTCGTGTTAGCCCTTTGAGGGGCAATT  
TTAGCCAACCTAACTTGTCTGCAACAAACAGACCTAAAATCTTTAATCGCATACTCATCT  
ATTAGCCACATAGGCCTAGTAATCGCATCAATCATATTAGGAACCGAGTGAAGCCTATCC  
GGGGCTATATCGTTAATAATCGCCCACGGATTCACATCATCAATACTATTCTGTCTTGCC

AATACCACCTATGAACGAACAAACACTCGCATCTTAATCCTAACACGAGGATTCATAAC  
CTTTTACCAATGACCACAGCCTGATGATTAATAGCTAACCTGTAAACATCGCCGTACCA  
CCTAGCCTTAACTTTACAGGAGAACTATTAATCGCATCATCCTTATTCAACTGATGTCCA  
ACAACAATGTTTCATATTTGGCCTCTCTATACTAATTACTGCCTCCTACTCCATACACATG  
TTTATATCTACCCAGATAGGGACACCACTACTAAACGTCTCAACACAACCAACACACTCA  
CGAGAACATCTACTTATAACCCTACACATAAGCCCTTTATCCTAATCTCAATAAAACCA  
GAGCTTGTATTT

>MZ712264\_ZMMUR14788\_[Pareas\_abros]

CTAGCAGCAATTCTTCTAAAATTGGGGGGTTATGGCTTGATCCGAATAATACAAATTATA  
CCCACCCCAAAAACAGATATATTCACCCCTTTTCTCGTGTTAGCCCTTTGAGGGGCAATT  
TTAGCCAACCTAACTTGCTGCAACAAACAGACCTAAAATCTTTAATCGCATACTCATCT  
ATTAGCCACATAGGCCTAGTAATCGCATCAATCATATTAGGAACCGAGTGAAGCCTATCC  
GGGGCTATATCGTTAATAATCGCCCACGGATTCACATCATCAATACTATTCTGTCTTGCC  
AATACCACCTATGAACGAACAAACACTCGCATCTTAATCCTAACACGAGGATTCATAAC  
CTTTTACCAATGACCACAGCCTGATGATTAATAGCTAACCTGTAAACATCGCCGTACCA  
CCTAGCCTTAACTTTACAGGAGAACTATTAATTGCTTCATCCTTATTCAACTGATGTCCA  
ACAACAATGTTTCATATTTGGCCTCTCTATACTAATTACTGCCTCCTACTCCATACACATG  
TTTATATCTACCCAGATAGGGACACCACTACTAAACGTCTCAACACAACCAACACACTCA  
CGAGAACATCTACTTATAACCCTACACATAAGCCCTTTATCCTAATCTCAATAAAACCA  
GAGCTTGTATTT

>MZ712265\_ZMMUR13656\_[Pareas\_temporalis]

CTAGCAGCCATTCTTCTAAAATTGGGGGGTTACGGGCTGATCCGGATAATACAAATTATA  
CCCACCCCAAAAACAGACATGTTTATCCCATTTCTCGTATTAGCCCTTTGAGGGGCTATT  
TTAGCCAATCTCACTTGCTTACAACAAACAGACCTAAAATCTTTAATCGCATACTCATCT  
ATTAGCCATATGGGTCTAGTAATCGCATCAATCATGCTAGGAACCCAATGAAGTCTATCC  
GGGGCTATATCATTAAATAATCGCCCACGGATTCACGTCATCCATACTATTCTGTCTTGCC  
AACACCACCTATGAACGAACAAATACTCGCATCCTAATCCTGACACGGGGGTTTCATAAC  
CTTTTACCGATAACCACCGCCTGATGACTAATAGCCAATCTATTAACATCGCCGTACCA  
CCCAGCCTTAACTTTACAGGAGAACTACTAATCGCATCATCCTTATTCAACTGATGTCCA

ACAACAATAATTATATTTGGTCTCTCTATACTAATCACTGCCTCCTACTCCCTACACATA  
TTTATATCCACCCAAATAGGCACACCCTTACTAAACACCCCAACACAACCAACACACTCA  
CGAGAACACCTACTTATAACTCTACACATAACCCCTCTTATTATAATCTCAATAAAACCA  
GAACTTGATTTT

>MZ712266\_SIEZC20215\_[Pareas\_temporalis]

CTAGCAGCCATTCTTCTAAAATTGGGGGGTTACGGGCTGATCCGGATAATACAAATTATA  
CCCACCCCAAAAACAGACATGTTTATCCCATTTCTCGTATTAGCCCTTTGAGGGGCTATT  
TTAGCCAATCTCACTTGCCTACAACAAACAGACCTAAAATCTTTAATCGCATACTCATCT  
ATTAGCCATATGGGTCTAGTAATCGCATCAATCATGCTAGGAACCCAATGAAGTCTATCC  
GGGGCTATATCATTAAATAATCGCCACGGATTACGTCATCCATACTATTCTGTCTTGCC  
AACACCACCTATGAACGAACAAATACTCGCATCCTAATCCTGACACGGGGGTTTCATAAC  
CTTTTACCGATAACCACCGCCTGATGACTAATAGCCAATCTATTAAACATCGCCGTACCA  
CCCAGCCTTAACTTTACAGGAGAACTACTAATCGCATCATCCTTATTCAACTGATGTCCA  
ACAACAATAATTATATTTGGTCTCTCTATACTAATCACTGCCTCCTACTCCCTACACATA  
TTTATATCCACCCAAATAGGCACACCCTTACTAAACACCCCAACACAACCAACACACTCA  
CGAGAACACCTACTTATAACTCTACACATAACCCCTCTTATTATAATCTCAATAAAACCA  
GAACTTGATTTT

>MZ712267\_LSUHC9098\_[Asthenodipsas\_lasgalenensis]

AATCTAGCAGCAATCTTATTTAAAATTGGGAGGGTACGGCATTATTCGAATAATACAAACT  
TTACCAATTATAAAAACCGACACATTTCTCCCATTATTATTCTTGCCTATGGGGAGCA  
ATCCTGGCTAATATAACCTGCTTACAACAAACCGACCTAAAATCGCTAATTGCATATTCA  
TCAATCAGCCACATAGGCCTAGTAATTGCAGCCGTCGTTTTACAAACTCAATGAGCACTA  
TCAGGGGCCATAACCCTAATAATTGCCCATGGCTTTACCTCTTCTGCCCTTTTCTGCCTT  
GCCAATAGCACATATGAACGAACCAACACTCGTATTTTAATTCTCACTCGAGGGTTCAC  
AACATCCTTCCAATAGCTACAACCTGGTGAATATTAATTAATCTTTTAAACATCGCCATT  
CCGCCTAGCCTAAATTTTACTGGTGAACTACTAATTGCATCATCCCTTTTCAACTGATGT  
CCAACAACAATTATTATATTTGGACTATCTATGTTAATCTCCGCCTCCTACTCACTACAT  
CTATTTCTATCCACCCAAATAGGAACACCACAATTAACCAATAATCTCACCAACACAC  
TCTCGAGAACACCTCCTTTTATCTTTACATGTCATTCCACTAATTTAATTTCAATAAAA

CCTGAACTGGTATTT

>MZ712268\_Avpt\_[Asthenodipsas\_vertebralis]

AATCTAGCAGCAATCTTATTAATAAATTGGGAGGGTACGGCATTATTCGAATAATACAAACT  
TTACCAATTATAAAAACCGACACATTTCTCCATTTCATTATTCTTGCCCTATGGGGAGCA  
ATCCTGGCTAATATAACCTGCTTACAACAAACCGACCTAAAATCGCTAATTGCATATTCA  
TCAATCAGCCACATAGGCCTAGTAATTGCAGCCGTCGTTTTACAAACTCAATGAGCACTA  
TCAGGGGCCATAACCCTAATAATTGCCCATGGCTTTACCTCTTCTGCCCTTTTCTGCCTT  
GCCAATAGCACATATGAACGAACCAACACTCGTATTTTAATTCTCACTCGAGGGTTCCAC  
AACATCCTTCCAATAGCTACAACCTGATGAATATTAATTAATCTTTTAAACATCGCCATT  
CCGCCTAGCCTAAATTTTACTGGTGAACACTACTAATTGCATCATCCCTTTTCAACTGATGT  
CCAACAACAATTATTATATTTGGACTATCTATATTAATCTCCGCCTCCTACTCACTACAT  
CTATTTCTATCCACCCAATAGGAACACCACAATTAACCAATAATCTCACCAACACAC  
TCTCGAGAACACCTCCTTTTATCTTTACATGTCATTCCACTAATTTTAATTTCAATAAAA  
CCTGAACTGGTATTT

***cmos nuDNA gene***

>MZ712269\_NMNH05625\_[Pareas\_komaii]

GATCAGTTATGTCTCTTGCATCTCCTGGGCTCTGGGGGCTTTGGCTCTGTCTACAAGGCA  
ACTTACCAAGGAGCTACAGTGGCTGTAAAACAAGTGAAGAGATGCAGTAAGAACCATTTG  
GCATCACGGCAAAGCTTCTGGGCAGAACTAAATGTAGCACGTCTTGACCATAACAATGTG  
GTACACATAGTAGCTGCTAGCACATGTACCCCTGCTAGTCAGGATAGTTTGGGTGCCATA  
ATTATGGAATATGCAGGTAATTGCACTCTACATCATATTATCTATGGGACTGGCTGTTTA  
ACAGGAAATAACAAGGATGGCCTTCAGTGTGATCTTGAGTTCTTGAGTACAGCTCAGGCT  
GTCATTTACGCCTGTGATATTGTGGCAGGGTTAATGTTCTCCTCATTCTCAGTTAATTGTG  
CATCTCGATTTAAACCTGCTAACATATTCATCACGGAGCATAATGTTTGCAAATTGGA  
GACTTTGGATGCTCCCAAAGCTAGAAAGATAGTGAATCATCAGGACTACATCTTTGTGAT  
CAAGGGGGAACATACACACATCGTGCTCCTGAACTTCTTAAAGGTGAGAAAATCACACCC  
AA

>MZ712270\_NMNH05654\_[Pareas\_iwasakii]

GATCAGTTATGTCTCTTGCATCTCCTGGGCTCTGGGGCTTTGGCTCTGTCTACAAGGCA  
ACTTACCAAGGAGCTACAGTGGCTGTAAAACAAGTGAAGAGATGCAGTAAGAACCATTTG  
GCATCACGGCAAAGCTTCTGGGCAGAACTAAATGTAGCACGCCTTGATCATAACAATGTG  
GTACACATAGTAGCTGCTAGCACATGTACCCCTGCTAGTCAGGATAGTTTGGGTGCCATA  
ATTATGGAATATGCAGGTAATTGCACTCTACATCATATTATCTATGGGACTGGCTGTTTA  
ACAGGAAATAACAAGGATGGCCTTCAGTGTGATCTTGAGTTCTTGAGTACAGCTCAGGCT  
GTCATTTACGCCTGTGATATTGTGGCAGGGTTAATGTTCTCCATTCTCAGTTAATTGTG  
CATCTCGATTTAAACCTGCTAACATATTCATCACGGAACATAATGTTTGCAAATTGGA  
GACTTTGGATGCTCCCAAAGCTAGAAAGATAGTGAATCATCAGGACTACATCTTTGTCAT  
CAAGGGGGAACATACACACATCGTGCTCCTGAACTTCTTAAAGGTGAGAAAATCACACCC  
AA

>MZ712271\_ZMMUR16628\_[Pareas\_macularius]

GATCAGTTATGTTTCTTGCATCTCCTGGGCTCTGGGGCTTTGGTTGTGTCTACAAGGCA  
ACTTACCAAGGAGCTACAGTGGCTGTAAAACAAGTGAAGAGATGCAGTAAGAACCATTTG  
GCATCACGGCAAAGCTTCTGGGGAGAACTAAATGTAGCCCGCCTTGACCATAACAATGTG  
GTACATATAGTAGCTGCCAGCACATGTACCCCTGCTAGTCAGGATAGTTTGGGTACCATA  
ATTATGGAATATGCAGGTAATTGCACTCTACATCATATTATCTATGGGACTGGCTATTTA  
ACAGGAAATAACAATGATGGCCTTCAATATGATCTTGAGTTCTTGAGTACAGCTCAGGCT  
GTCATTTATGCCTGTGATATTGTGACAGGGTTAATGTTTCTCCATTCTCAGTTAATTGTG  
CATATGGATTTAAACCTGCTAACATATTCATCACAGAACATAATGTTTGCAAATTGGA  
GACTTTGGATGCTCCCAAAGCTAGAAAGATAGTGAATCATCAGGACTACATCTTTGTCAT  
CAAGGGGGAACATACACACATCGTGCTCCTGAACTTCTTAAAGGTGAGAAAATCACACCC  
AA

>MZ712272\_CIB098271\_[Pareas\_margaritophorus]

GATCAGTTATGTTTCTTGCATCTCCTGGGCTCTGGAGGCTTTGGTTGTGTCTACAAGGCA  
ACTTACCAAGGAGCTACAGTGGCTGTAAAACAAGTGAAGAGATGCAGTAAGAACCATTTG  
GCATCACGGCAAAGCTTCTGGGCAGAACTAAATGTAGCACGCCTTGACCATAACAATGTG  
GTACACATAGTAGCTGCTAGCACATGTACCCCTGCTAGTCAGGATAGTTTGGGTACCATA  
ATTATGGAATATGCAGGTAATTGCACTCTACATCATATTATCTATGGAAGTGGCTATTTA



ACAGGAAATAACAATGATGGCCTTCAATATGATCTTGAGTTCTTGAGTACAGCTCAGGCT  
GTCATTTACGCCTGTGATATTGTGACAGGGTTAATGTTTCTCCATTCTCAGTTAATTGTG  
CATCTGGATTTAAAACCTGCTAACATATTCATCACAGAACATAATGTTTGCAAATTGGA  
GACTTTGGATGCTCCCAAAGCTAGAAGATAGTGAATCATCAGGACTACATCTTTGTCAT  
CAAGGGGGAACATACACACATCGTGCTCCTGAACTTCTTAAAGGTGAGAAAATCACACCC  
AA

>MZ712273\_ZMMUNAP09759\_[Pareas\_margaritophorus]

TATTGGACTTGGGATCAGTTATGTTTCTTGCATCTCCTGGGCTCTGGGGGCTTTGGTTGT  
GTCTACAAGGCAACTTACCAAGGAGCTACAGTGGCTGTAAAACAAGTGAAGAGATGCAGT  
AAGAACCATTTGGCATCACGGCAAAGCTTCTGGGCAGAACTAAATGTAGCACGCCTTGAC  
CATAACAATGTGGTACACATAGTAGCTGCTAGCACATGTACCCCTGCTAGTCAGGATAGT  
TTGGGTACCATAATTATGGAATATGCAGGTAATTGCACTCTACATCATATTATCTATGGG  
ACTGGCTATTTAACAGGAAATAACAATGATGGCCTTCAATATGATCTAGAGTTCTTGAGT  
ACAGCTCAGGCTGTCATTTACGCCTGTGATATTGTGACAGGGTTAATGTTTCTCCATTCT  
CAGTTAATTGTGCATCTGGATTTAAAACCTGCTAACATATTCATCACAGAACATAATGTT  
TGCAAATTGGAGACTTTGGATGCTCCCAAAGCTAGAAGATAGTGAATCATCAGGACTA  
CATCTTTGTCATCAAGGGGGAACATACACACATCGTGCTCCTGAACTTCTTAAAGGTGAG  
AAAATCCAAACCCA

>MZ712274\_FMNH255567\_[Pareas\_formosensis]

GATCAGTTATGTCTCTTGCATCTCCTGGGCTCTGGGGGCTTTGGCTCTGTCTACAAGGCA  
ACTTACCAAGGAGCTACAGTGGCTGTAAAACAAGTGAAGAGATGCAGTAAGAACCATTTG  
GCATCACGGCAAAGCTTCTGGGCAGAACTAAATGTAGCACGCCTTGACCATAACAATGTG  
GTACACATAGTAGCTGCTAGCACATGTACCCCTGCTAGTCAGGATAGTTTGGGTGCCATA  
ATTATGGAATATGCAGGTAATTGCACTCTACATCATATTATCTATGGGACTGGCTGTTA  
ACAAGAAATAACAAGGATGGCCTTCAGTGTGATCTTGAGTTCTTGAGTACAGCTCAGGCT  
GTCATTTACGCCTGTGATATTGTGGCAGGGTTAATGTTTCTCCATTCTCAGTTAATTGTG  
CATCTGGATTTAAAACCTGCTAACATATTCATCACGGAACATAATGTTTGCAAATTGGA  
GACTTTGGATGCTCCCAAAGCTAGAAGATAGTGAATCATCAGGACTACATCTTTGTCAT  
CAAGGGGGAACATACACACATCGTGCTCCTGAACTTCTTAAAGGTGAGAAAATCACACCC

AA

>MZ712275\_CIB098270\_[Pareas\_menglaensis]

GATCAGTTATGTCTCCTGCATCTCCTGGGCTCTGGGGCTTTGGTTCTGTCTACAAGGCA  
ACTTACCAAGGAGCTACAGTGGCTGTAAAACAGGTGAAGAGATGCAGTAAGAACCATTTG  
GCATCACGGCAAAGCTTCTGGGCAGAACTAAATGTAGCACGCCTTGACCATAACAATGTG  
GTACACATAGTAGCTGCTAGCACATGTACTCCTGCTAGTCAGGATAGTCTGGGTACCATA  
ATTATGGAATATGCAGGTAATTGCACTCTACATCATATTATCTATGGGACTGGCTATTTA  
ACAGGAAATAACAATGATGGCCTTCAATGTGATTTTGAGTTCTTGACTACAGCTCAGGCT  
GTCATTTACGCCTGTGATATTGTGGCGGGCTTAATGTTTCTCCATTCTCAGTTAATTGTG  
CATCTGGATTTAAAACCTGCTAACATATTCATCACAGAACATAGTGTTTGCAAATTGGA  
GACTTTGGATGCTCCCAAAGCTAGAAAGATAGTGAATCATCAGGACTACATCTTTGTCAT  
CAAGGGGGAACATACACACATCGTGCTCCTGAACTTCTTAAAGGTGAGAAAATCACACCC

AA

>MZ712276\_AUP01573\_[Pareas\_berdmorei\_berdmorei]

GATCAGTTATGTCTCCTGCATCTCCTGGGCTCTGGGGCTTTGGTTCTGTCTACAAGGCA  
ACTTACCAAGGAGCTACAGTGGCTGTAAAACAGGTGAAGAGATGCAGTAAGAACCATTTG  
GCATCACGGCAAAGCTTCTGGGCAGAACTAAATGTAGCACGCCTTGACCATAACAATGTG  
GTACACATAGTAGCTGCTAGCACATGTACTCCTGCTAGTCAGGATAGTCTGGGTACCATA  
ATTATGGAATATGCAGGTAATTGCACTCTACATCATATTATCTATGGGACTGGCTATTTA  
ACAGGAAATAACAATGATGGCCTTCAATGTGATTTTGAGTTCTTGACTACAGCTCAGGCT  
GTCATTTACGCCTGTGATATTGTGGCGGGCTTAATGTTTCTCCATTCTCAGTTAATTGTG  
CATCTGGATTTAAAACCTGCTAACATATTCATCACAGAACATAGTGTTTGCAAATTGGA  
GACTTTGGATGCTCCCAAAGCTAGAAAGATAGTGAATCATCAGGACTACATCTTTGTCAT  
CAAGGGGGAACATACACACATCGTGCTCCTGAACTTCTTAAAGGTGAGAAAATCACACCC

AA

>MZ712277\_CAS240362\_[Pareas\_berdmorei\_berdmorei]

GATCAGTTATGTCTCCTGCATCTCCTGGGCTCTGGAGGCTTTGGTTCTGTCTACAAGGCA  
ACTTACCAAGGAGCTACAGTGGCTGTAAAACAGGTGAAGAGATGCAGTAAGAACCATTTG  
GCATCACGGCAAAGCTTCTGGGCAGAACTAAATGTAGCACGCCTTGACCATAACAATGTG

GTACACATAGTAGCTGCTAGCACATGTA CTCTGCTAGTCAGGATAGTCTGGGTACCATA  
ATTATGGAATATGCAGGTAATTGCACTCTACATCATATTATCTATGGGACTGGCTATTTA  
ACAGGAAATAACAATGATGGCCTTCAATGTGATTTTGAGTTCTTTACTACAGCTCAGGCT  
GTCATTTACGCCTGTGATATTGTGGCGGGCTTAATGTTTCTCCATTCTCAGTTAATTGTG  
CATCTGGATTTAAAACCTGCTAACATATTCATCACAGAACATAGTGTTTGCAAATTGGA  
GACTTTGGATGCTCCCAAAGCTAGAAAGATAGTGAATCATCAGGACTACATCTTTGTCAT  
CAAGGGGGAACATACACACATCGTGCTCCTGAACTTCTTAAAGGTGAGAAAATCACACCC  
AA

>MZ712278\_ZMMUR16803\_[Pareas\_berdmorei\_berdmorei]

GATCAGTTATGTCTCCTGCATCTCCTGGGCTCTGGAGGCTTTGGTTCTGTCTACAAGGCA  
ACTTACCAAGGAGCTACAGTGGCTGTAAAACAGGTGAAGAGATGCAGTAAGAACCATTTG  
GCATCACGGCAAAGCTTCTGGGCAGAACTAAATGTAGCACGCCTTGACCATAACAATGTG  
GTACACATAGTAGCTGCTAGCACATGTA CTCTGCTAGTCAGGATAGTCTGGGTACCATA  
ATTATGGAATATGCAGGTAATTGCACTCTACATCATATTATCTATGGGACTGGCTATTTA  
ACAGGAAATAACAATGATGGCCTTCAATGTGATTTTGAGTTCTTTACTACAGCTCAGGCT  
GTCATTTACGCCTGTGATATTGTGGCGGGCTTAATGTTTCTCCATTCTCAGTTAATTGTG  
CATCTGGATTTAAAACCTGCTAACATATTCATCACAGAACATAGTGTTTGCAAATTGGA  
GACTTTGGATGCTCCCAAAGCTAGAAAGATAGTGAATCATCAGGACTACATCTTTGTCAT  
CAAGGGGGAACATACACACATCGTGCTCCTGAACTTCTTAAAGGTGAGAAAATCACACCC  
AA

>MZ712279\_ZMMUR137531\_[Pareas\_berdmorei\_unicolor]

GATCAGTTATGTCTCCTGCATCTCCTGGGCTCTGGGGGCTTTGGTTCTGTCTACAAGGCA  
ACTTACCAAGGAGCTACAGTGGCGGTAAAACAGGTGAAGAGATGCAGTAAGAACCATTTG  
GCATCACGGCAAAGCTTCTGGGCAGAGCTAAATGTAGCACGCCTTGACCATAACAATGTG  
GTACACATAGTAGCTGCTAGCACATGTACCCCTGCTAGTCAGGATAGTCTGGGTACCATA  
ATTATGGAATATGCAGGTAATTGCACTCTACATCATATTATCTATGGGACTGGCTATTTA  
ACAGGAAATAACAATGATGGCCTTCAATGTGATTTTGAGTTCTTGACTACAGCTCAGGCT  
GTCATTTACGCCTGTGATATTGTGGCGGGCTTAATGTTTCTCCATTCTCAGTTAATTGTG  
CATCTGGATTTAAAACCTGCTAACATATTCATCACAGAACATAGTGTTTGCAAATTGGA

GACTTTGGATGCTCCCAAAGCTAGAAAGATAGTGAATCATCAGGACTACATCTTTGTCAT  
CAAGGGGGAAACATACACACATCGTGCTCCTGAACTTCTTAAAGGTGAGAAAATCACACCC  
AA

>MZ712280\_ZMMUR137532\_[Pareas\_berdmorei\_unicolor]

GATCAGTTATGTCTCCTGCATCTCCTGGGCTCTGGGGGCTTTGGTTCTGTCTACAAGGCA  
ACTTACCAAGGAGCTACAGTGGCGGTAACACAGTGAAGAGATGCAGTAAGAACCATTTG  
GCATCACGGCAAAGCTTCTGGGCAGAGTTAAATGTAGCACGCCTTGACCATAACAATGTG  
GTACACATAGTAGCTGCTAGCACATGTACCCCTGCTAGTCAGGATAGTCTGGGTACCATA  
ATTATGGAATATGCAGGTAATTGCACTCTACATCATATTATCTATGGGACTGGCTATTTA  
ACAGGAAATAACAATGATGGCCTTCAATGTGATTTTGAGTTCTTGACTACAGCTCAGGCT  
GTCATTTACGCCTGTGATATTGTGGCGGGCTTAATGTTTCTCCATTCTCAGTTAATTGTG  
CATCTGGATTTAAAACCTGCTAACATATTCATCACAGAACATAGTGTTTGCAAATTGGA  
GACTTTGGATGCTCCCAAAGCTAGAAAGATAGTGAATCATCAGGACTACATCTTTGTCAT  
CAAGGGGGAAACATACACACATCGTGCTCCTGAACTTCTTAAAGGTGAGAAAATCACACCC  
AA

>MZ712281\_ZMMUR14013\_[Pareas\_berdmorei\_unicolor]

GATCAGTTATGTCTCCTGCATCTCCTGGGCTCTGGGGGCTTTGGTTCTGTCTACAAGGCA  
ACTTACCAAGGAGCTACAGTGGCGGTAACACAGGTAAGAGATGCAGTAAGAACCATTTG  
GCATCACGGCAAAGCTTCTGGGCAGAGCTAAATGTAGCACGCCTTGACCATAACAATGTG  
GTACACATAGTAGCTGCTAGCACATGTACCCCTGCTAGTCAGGATAGTCTGGGTACCATA  
ATTATGGAATATGCAGGTAATTGCACTCTACATCATATTATCTATGGGACTGGCTATTTA  
ACAGGAAATAACAATGATGGCCTTCAATGTGATTTTGAGTTCTTGACTACAGCTCAGGCT  
GTCATTTACGCCTGTGATATTGTGGCGGGCTTAATGTTTCTCCATTCTCAGTTAATTGTG  
CATCTGGATTTAAAACCTGCTAACATATTCATCACAGAACATAGTGTTTGCAAATTGGA  
GACTTTGGATGCTCCCAAAGCTAGAAAGATAGTGAATCATCAGGACTACATCTTTGTCAT  
CAAGGGGGAAACATACACACATCGTGCTCCTGAACTTCTTAAAGGTGAGAAAATCACACCC  
AA

>MZ712282\_ZMMUR14263\_[Pareas\_berdmorei\_unicolor]

GATCAGTTATGTCTCCTGCATCTCCTGGGCTCTGGGGGCTTTGGTTCTGTCTACAAGGCA

ACTTACCAAGGAGCTACAGTGGCGGTAACAGGTGAAGAGATGCAGTAAGAACCATTTG  
GCATCACGGCAAAGCTTCTGGGCAGAGCTAAATGTAGCACGCCTTGACCATAACAATGTG  
GTACACATAGTAGCTGCTAGCACATGTACCCCTGCTAGTCAGGATAGTCTGGGTACCATA  
ATTATGGAATATGCAGGTAATTGCACTCTACATCATATTATCTATGGGACTGGCTATTTA  
ACAGGAAATAACAATGATGGCCTTCAATGTGATTTTGAGTTCTTGACTACAGCTCAGGCT  
GTCATTTACGCCTGTGATATTGTGGCGGGCTTAATGTTTCTCCATTCTCAGTTAATTGTG  
CATCTGGATTTAAACCTGCTAACATATTCATCACAGAACATAGTGTGGCAAATTGGA  
GACTTTGGATGCTCCCAAAGCTAGAAAGATAGTGAATCATCAGGACTACATCTTTGTCAT  
CAAGGGGGAACATACACACATCGTGCTCCTGAACTTCTTAAAGGTGAGAAAATCACACCC  
AA

>MZ712283\_ZMMUR14421\_[Pareas\_berdmorei\_unicolor]

GATCAGTTATGTCTCCTGCATCTCCTGGGCTCTGGGGGCTTTGGTTCTGTCTACAAGGCA  
ACTTACCAAGGAGCTACAGTGGCGGTAACATGTGAAGAGATGCAGTAAGAACCATTTG  
GCATCACGGCAAAGCTTCTGGGCAGAGCTAAATGTAGCACGCCTTGACCATAACAATGTG  
GTACACATAGTAGCTGCTAGCACATGTACCCCTGCTAGTCAGGATAGTCTGGGTACCATA  
ATTATGGAATATGCAGGTAATTGCACTCTACATCATATTATCTATGGGACTGGCTATTTA  
ACAGGAAATAACAATGATGGCCTTCAATGTGATTTTGAGTTCTTGACTACAGCTCAGGCT  
GTCATTTACGCCTGTGATATTGTGGCGGGCTTAATGTTTCTCCATTCTCAGTTAATTGTG  
CATCTGGATTTAAACCTGCTAACATATTCATCACAGAACATAGTGTGGCAAATTGGA  
GACTTTGGATGCTCCCAAAGCTAGAAAGATAGTGAATCATCAGGACTACATCTTTGTCAT  
CAAGGGGGAACATACACACATCGTGCTCCTGAACTTCTTAAAGGTGAGAAAATCACACCC  
AA

>MZ712284\_SIEZC20216\_[Pareas\_berdmorei\_unicolor]

GATCAGTTATGTCTCCTGCATCTCCTGGGCTCTGGGGGCTTTGGTTCTGTCTACAAGGCA  
ACTTACCAAGGAGCTACAGTGGCGGTAACAGGTGAAGAGATGCAGTAAGAACCATTTG  
GCATCACGGCAAAGCTTCTGGGCAGAGCTAAATGTAGCACGCCTTGACCATAACAATGTG  
GTACACATAGTAGCTGCTAGCACATGTACCCCTGCTAGTCAGGATAGTCTGGGTACCATA  
ATTATGGAATATGCAGGTAATTGCACTCTACATCATATTATCTATGGGACTGGCTATTTA  
ACAGGAAATAACAATGATGGCCTTCAATGTGATTTTGAGTTCTTGACTACAGCTCAGGCT

GTCATTTACGCCTGTGATATTGTGGCGGGCTTAATGTTTCTCCATTCTCAGTTAATTGTG  
CATCTGGATTTAAAACCTGCTAACATATTCATCTCAGAACATAGTGTTTGCAAATTGGA  
GACTTTGGATGCTCCCAAAGCTAGAAAGATAGTGAATCATCAGGACTACATCTTTGTCAT  
CAAGGGGGAACATACACACATCGTGCTCCTGAACTTCTTAAAGGTGAGAAAATCACACCC  
AA

>MZ712285\_ZMMUR136791\_[Pareas\_berdmorei\_unicolor]

GATCAGTTATGTCTCCTGCATCTCCTGGGCTCTGGGGGCTTTGGTTCTGTCTACAAGGCA  
ACTTACCAAGGAGCTACAGTGGCGGTAAAACAGGTGAAGAGATGCAGTAAGAACCATTTG  
GCATCACGGCAAAGCTTCTGGGCAGAGCTAAATGTAGCACGCCTTGACCATAACAATGTG  
GTACACATAGTAGCTGCTAGCACATGTACCCCTGCTAGTCAGGATAGTCTGGGTACCATA  
ATTATGGAATATGCAGGTAATTGCACTCTACATCATATTATCTATGGGACTGGCTATTTA  
ACAGGAAATAACAATGATGGCCTTCAATGTGATTTTGAGTTCTTGACTACAGCTCAGGCT  
GTCATTTACGCCTGTGATATTGTGGCGGGCTTAATGTTTCTCCATTCTCAGTTAATTGTG  
CATCTGGATTTAAAACCTGCTAACATATTCATCACAGAACATAGTGTTTGCAAATTGGA  
GACTTTGGATGCTCCCAAAGCTAGAAAGATAGTGAATCATCAGGACTACATCTTTGTCAT  
CAAGGGGGAACATACACACATCGTGCTCCTGAACTTCTTAAAGGTGAGAAAATCACACCC  
AA

>MZ712286\_ZMMUR136792\_[Pareas\_berdmorei\_unicolor]

GATCAGTTATGTCTCCTGCATCTCCTGGGCTCTGGGGGCTTTGGTTCTGTCTACAAGGCA  
ACTTACCAAGGAGCTACAGTGGCGGTAAAACAGGTGAAGAGATGCAGTAAGAACCATTTG  
GCATCACGGCAAAGCTTCTGGGCAGAGCTAAATGTAGCACGCCTTGACCATAACAATGTG  
GTACACATAGTAGCTGCTAGCACATGTACCCCTGCTAGTCAGGATAGTCTGGGTACCATA  
ATTATGGAATATGCAGGTAATTGCACTCTACATCATATTATCTATGGGACTGGCTATTTA  
ACAGGAAATAACAATGATGGCCTTCAATGTGATTTTGAGTTCTTGACTACAGCTCAGGCT  
GTCATTTACGCCTGTGATATTGTGGCGGGCTTAATGTTTCTCCATTCTCAGTTAATTGTG  
CATCTGGATTTAAAACCTGCTAACATATTCATCACAGAACATAGTGTTTGCAAATTGGA  
GACTTTGGATGCTCCCAAAGCTAGAAAGATAGTGAATCATCAGGACTACATCTTTGTCAT  
CAAGGGGGAACATACACACATCGTGCTCCTGAACTTCTTAAAGGTGAGAAAATCACACCC  
AA

>MZ712287\_ZMMUR14165\_[Pareas\_berdmorei\_unicolor]

GATCAGTTATGTCTCCTGCATCTCCTGGGCTCTGGAGGCTTTGGTTCTGTCTACAAGGCA  
ACTTACCAAGGAGCTACAGTGGCGGTAAAACAGGTGAAGAGATGCAGTAAGAACCATTTG  
GCATCACGGCAAAGCTTCTGGGCAGAGCTAAATGTAGCACGCCTTGACCATAACAATGTG  
GTACACATAGTAGCTGCTAGCACATGTACCCCTGCTAGTCAGGATAGTCTGGGTACCATA  
ATTATGGAATATGCAGGTAATTGCACTCTACATCATATTATCTATGGGACTGGCTATTTA  
ACAGGAAATAACAATGATGGCCTTCAATGTGATTTTGAGTTCTTGACTACAGCTCAGGCT  
GTCATTTACGCCTGTGATATTGTGGCGGGCTTAATGTTTCTCCATTCTCAGTTAATTGTG  
CATCTGGATTTAAAACCTGCTAACATATTCATCACAGAACATAGTGTTTGCAAATTGGA  
GACTTTGGATGCTCCCAAAGCTAGAAAGATAGTGAATCATCAGGACTACATCTTTGTCAT  
CAAGGGGGAACATACACACATCGTGCTCCTGAACTTCTTAAAGGTGAGAAAATCACACCC  
AA

>MZ712288\_ZMMUR16801\_[Pareas\_berdmorei\_truongsonicus]

GATCAGTTATGTCTCCTGCATCTCCTGGGCTCTGGGGGCTTTGGTTCTGTCTACAAGGCA  
ACTTACCAAGGAGCTACAGTGGCGGTAAAACAGGTGAAGAGATGCAGTAAGAACCATTTG  
GCATCACGGCAAAGCTTCTGGGCAGAGCTAAATGTAGCACGCCTTGACCATAACAATGTG  
GTACACATAGTAGCTGCTAGCACATGTACCCCTGCTAGTCAGGATAGTCTGGGTACCATA  
ATTATGGAATATGCAGGTAATTGCACTCTACATCATATTATCTATGGGACTGGCTATTTA  
ACAGGAAATAACAATGATGGCCTTCAATGTGATTTTGAGTTCTTGACTACAGCTCAGGCT  
GTCATTTACGCCTGTGATATTGTGGCGGGCTTAATGTTTCTCCATTCTCAGTTAATTGTG  
CATCTGGATTTAAAACCTGCTAACATATTCATCACAGAACATAGTGTTTGCAAATTGGA  
GACTTTGGATGCTCCCAAAGCTAGAAAGATAGTGAATCATCAGGACTACATCTTTGTCAT  
CAAGGGGGAACATACACACATCGTGCTCCTGAACTTCTTAAAGGTGAGAAAATCACACCC  
AA

>MZ712289\_ZMMUR14796\_[Pareas\_berdmorei\_truongsonicus]

GATCAGTTATGTCTCCTGCATCTCCTGGGCTCTGGGGGCTTTGGTTCTGTCTACAAGGCA  
ACTTACCAAGGAGCTACAGTGGCGGTAAAACAGGTGAAGAGATGCAGTAAGAACCATTTG  
GCATCACGGCAAAGCTTCTGGGCAGAGCTAAATGTAGCACGCCTTGACCATAACAATGTG  
GTACACATAGTAGCTGCTAGCACATGTACCCCTGCTAGTCAGGATAGTCTGGGTACCATA

ATTATGGAATATGCAGGTAATTGCACTCTACATCATATTATCTATGGGACTGGCTATTTA  
ACAGGAAATAACAATGATGGCCTTCAATGTGATTTTGAGTTCTTGACTACAGCTCAGGCT  
GTCATTTACGCCTGTGATATTGTGGCGGGCTTAATGTTTCTCCATTCTCAGTTAATTGTG  
CATCTGGATTTAAAACCTGCTAACATATTCATCACAGAACATAGTGTTTGCAAATTGGA  
GACTTTGGATGCTCCCAAAGCTAGAAGATAGTGAATCATCAGGACTACATCTTTGTCAT  
CAAGGGGGAACATACACACATCGTGCTCCTGAACTTCTTAAAGGTGAGAAAATCACACCC  
AA

>MZ712290\_ZMMUR16800\_[Pareas\_carinatus\_tenasserimicus]

CTATGGACTTGGGATCAGTTATGTCTCCTGCATCTCCTGGGCTCTGGGGGCTTTGGTTCT  
GTCTACAAGGCAACTTACCAAGGAGCTACAGTGGCTGTAAAACAGGTGAAGAGATGCAGT  
AAGAACCATTGGCATCACGGCAAAGCTTCTGGGCAGAACTAAATGTAGCACGCCTTGAC  
CATAACAATGTGGTACACATAGTAGCTGCTAGCACATGTACCCCTGCTAGTCAGGATAGT  
TTGGGTACCATAATTATGGAATATGCAGGTAATTGCACTCTACATCATATTATCTATGGG  
ACTGGCTATTTAACAGGAAATAACAATGATGGCCTTCAATGTGATTTTGAGTTCTTGACT  
ACAGCTCAGGCTGTCATTTACGCCTGTGATATTGTGGCGGGCTTAATGTTTCTCCATTCT  
CAGTTAATTGTGCATCTGGATTTAAAACCTGCTAACATATTCATCACAGAACATAGTGTT  
TGCAAATTGGAGACTTTGGATGCTCCCAAAGCTAGAAGATAGTGAATCATCAGGACTA  
CATCTTTGTCATCAAGGGGGAACATACACACATCGTGCTCCTGAACTTCTTAAAGGTGAG  
AAAATCCAAACCCA

>MZ712291\_CAS247982\_[Pareas\_carinatus\_tenasserimicus]

GATCAGTTATGTCTCCTGCATCTCCTGGGCTCTGGGGGCTTTGGTTCTGTCTACAAGGCA  
ACTTACCAAGGAGCTACAGTGGCTGTAAAACAGGTGAAGAGATGCAGTAAGAACCATTTG  
GCATCACGGCAAAGCTTCTGGGCAGAACTAAATGTAGCACGCCTTGACCATAACAATGTG  
GTACACATAGTAGCTGCTAGCACATGTACCCCTGCTAGTCAGGATAGTTTGGGTACCATA  
ATTATGGAATATGCAGGTAATTGCACTCTACATCATATTATCTATGGGACTGGCTATTTA  
ACAGGAAATAACAATGATGGCCTTCAATGTGATTTTGAGTTCTTGACTACAGCTCAGGCT  
GTCATTTACGCCTGTGATATTGTGGCGGGCTTAATGTTTCTCCATTCTCAGTTAATTGTG  
CATCTGGATTTAAAACCTGCTAACATATTCATCACAGAACATAGTGTTTGCAAATTGGA  
GACTTTGGATGCTCCCAAAGCTAGAAGATAGTGAATCATCAGGACTACATCTTTGTCAT



CAAGGGGGAACATACACACATCGTGCTCCTGAACTTCTTAAAGGTGAGAAAATCACACCC  
AA

>MZ712292\_LSUHC10604\_[Pareas\_carinatus\_carinatus]

GATCAGTTATGTCTCCTGCATCTCCTGGGCTCTGGGGGCTTTGGTTCTGTCTACAAGGCA  
ACTTACCAAGGAGCTACAGTGGCTGTAAAACAGGTGAAGAGATGCAGTAAGAACCATTTG  
GCATCACGGCAAAGCTTCTGGGCAGAACTAAATGTAGCACGCCTTGACCATAACAATGTG  
GTACACATAGTAGCTGCTAGCACATGTACCCCTGCTAGTCAGGATAGTTTGGGTACCATA  
ATTATGGAATATGCAGGTAATTGCACTCTACATCATATTATCTATGGGACTGGCTATTTA  
ACAGGAAATAACAATGATGGCCTTCAATGTGATTTTGAGTTCTTGACTACAGCTCAGGCT  
GTCATTTACGCCTGTGATATTGTGGCGGGCTTAATGTTTCTCCATTCTCAGTTAATTGTG  
CATCTGGATTTAAAACCTGCTAACATATTCATCACAGAACATAGTGTTTGCAAATTGGA  
GACTTTGGATGCTCCCAAAGCTAGAAAGATAGTGAATCATCAGGACTACATCTTTGTCAT  
CAAGGGGGAACATACACACATCGTGCTCCTGAACTTCTTAAAGGTGAGAAAATCACACCC  
AA

>MZ712293\_ZMMUR16393\_[Pareas\_abros]

GATCAGTTATGTCTCCTGCATCTCCTGGGCTCTGGAGGCTTTGGTTCTGTCTACAAGGCA  
ACTTACCAAGGAGCTACAGTGGCTGTAAAACAAGTGAAGAGATGCAGTAAGAACCATTTG  
GCATCACGGCAAAGCTTCTGGGCAGAACTAAATGTAGCACGCCTTGACCATAACAATGTG  
GTACACATAGTAGCTGCTAGCACATGTACCCCTACTAGTCAGGATAGTCTGGGTACCATA  
ATTATGGAATATGCAGGTAATTGCACTCTACATCATATTATCTATGGGATTGGCTATTTA  
ACAGGAAATAACAATGATGGCCTTCAATGTGATCTTGAGTTCTTGACTACAGCTCAGGCT  
GTCATTTACGCCTGTGATATTGTGGCAGGCTTAATGTTTCTCCATTCTCAGTTAATTGTG  
CATCTGGATTTAAAACCTGCTAACATATTCATCACAGAACATAGTGTTTGCAAATTGGA  
GACTTTGGATGCTCCCAAAGCTAGAAAGATAGTGAATCATCAGGACTACATCTTTGTCAT  
CAAGGGGGAACATACACACATCGTGCTCCTGAACTTCTTAAAGGTGAGAAAATCACACCC  
AA

>MZ712294\_ZMMUR16392\_[Pareas\_abros]

GATCAGTTATGTCTCCTGCATCTCCTGGGCTCTGGAGGCTTTGGTTCTGTCTACAAGGCA  
ACTTACCAAGGAGCTACAGTGGCTGTAAAACAAGTGAAGAGATGCAGTAAGAACCATTTG

GCATCACGGCAAAGCTTCTGGGCAGAACTAAATGTAGCACGCCTTGACCATAACAATGTG  
GTACACATAGTAGCTGCTAGCACATGTACCCCTACTAGTCAGGATAGTCTGGGTACCATA  
ATTATGGAATATGCAGGTAATTGCACTCTACATCATATTATCTATGGGATTGGCTATTTA  
ACAGGAAATAACAATGATGGCCTTCAATGTGATCTTGAGTTCTTGACTACAGCTCAGGCT  
GTCATTTACGCCTGTGATATTGTGGCAGGCTTAATGTTTCTCCATTCTCAGTTAATTGTG  
CATCTGGATTTAAACCTGCTAACATATTCATCACAGAACATAGTGTTTGCAAATTGGA  
GACTTTGGATGCTCCCAAAGCTAGAAAGATAGTGAATCATCAGGACTACATCTTTGTCAT  
CAAGGGGGAACATACACACATCGTGCTCCTGAACTTCTTAAAGGTGAGAAAATCACACCC  
AA

>MZ712295\_ZMMUR14788\_[Pareas\_abros]

GATCAGTTATGTCTCCTGCATCTCCTGGGCTCTGGAGGCTTTGGTTCTGTCTACAAGGCA  
ACTTACCAAGGAGCTACAGTGGCTGTAAAACAAGTGAAGAGATGCAGTAAGAACCATTTG  
GCATCACGGCAAAGCTTCTGGGCAGAACTAAATGTAGCACGCCTTGACCATAACAATGTG  
GTACACATAGTAGCTGCTAGCACATGTACCCCTACTAGTCAGGATAGTCTGGGTACCATA  
ATTATGGAATATGCAGGTAATTGCACTCTACATCATATTATCTATGGGATTGGCTATTTA  
ACAGGAAATAACAATGATGGCCTTCAATGTGATCTTGAGTTCTTGACTACAGCTCAGGCT  
GTCATTTACGCCTGTGATATTGTGGCAGGCTTAATGTTTCTCCATTCTCAGTTAATTGTG  
CATCTGGATTTAAACCTGCTAACATATTCATCACAGAACATAGTGTTTGCAAATTGGA  
GACTTTGGATGCTCCCAAAGCTAGAAAGATAGTGAATCATCAGGACTACATCTTTGTCAT  
CAAGGGGGAACATACACACATCGTGCTCCTGAACTTCTTAAAGGTGAGAAAATCACACCC  
AA

>MZ712296\_ZMMUR16802\_[Pareas\_kuznetsovorum]

CTCATGGACTGGGATCAGTTATGTCTCCTGCATCTCCTGGGCTCTGGGGGCTTTGGTTCT  
GTCTACAAGGCAACTTACCAAGGAGCTACAGTGGCTGTAAAACAGGTGAAGAGATGCAGT  
AAGAACCATTTGGCATCACGGCAAAGCTTCTGGGCAGAACTAAATGTAGCACGCCTTGAC  
CATAACAATGTGGTACACATAGTAGCTGCTAGCACATGTACCCCTGCTAGTCAGGATAGT  
CTGGGTACCATAATTATGGAATATGCAGGTAATTGCACTCTACATCATATTATCTATGGG  
ACTGGCTATTTAACAGGAAATAACAATGATGGCCTTCAATGTGATTTTGAAGTTCTTGACT  
ACAGCTCAGGCTGTCATTTACGCCTGTGATATTGTGGCGGGCTTAATGTTTCTCCATTCT

CAGTTAATTGTGCATCTGGATTTAAAACCTGCTAACATATTCATCACAGAACATAGTGTT  
TGCAAAATTGGAGACTTTGGATGCTCCCAAAGCTAGAAGATAGTGAATCATCAGGACTA  
CATCTTTGTCATCAAGGGGGAACATACACACATCGTGCTCCTGAACTTCTTAAAGGTGAG  
AAAATCACACCCAA

>MZ712297\_ZMMUR13656\_[Pareas\_temporalis]

GAGCAGTTATGTTTCCTGCATCTCCTGGGCTCTGGGGCTTTGGTTCTGTCTACAAGGCA  
ACTTACCAAGGAGCTACAGTGGCTGTAAAACAAGTGAAGAGATGCAGTAAGAACCATTTG  
GCATCACGGCAAAGCTTCTGGGCAGAACTAAATGTAGCACGCCTTGACCATAACAATGTG  
GTACACATAGTAGCTGCTAGCACATGTACCCCTGCTAGTCAGGATAGTCTGGGTACCATA  
ATTATGGAATATGCAGGTAATTGCACTCTACATCATATTATCTATGGGATTGGCTATTTA  
ACAGGAAATAACAATGATGGCCTTCAATGTGATCTTGAGTTCTTGACTACAGCTCAGGCT  
GTCATTTACGCCTGTGATATTGTGGCAGGCTTAATGTTTCTCCATTCTCAGTTAATTGTG  
CATCTGGATTTAAAACCTGCTAACATATTCATCACAGAACATAGTGTTTGCAAAATTGGA  
GACTTTGGATGCTCCCAAAGCTAGAAGATAGTGAATCATCAGGACTACATCTTTGTCAT  
CAAGGGGGGAACATACACACATCGTGCTCCTGAACTTCTTAAAGGTGAGAAAATCACAACC  
CA

>MZ712298\_SIEZC20215\_[Pareas\_temporalis]

GAGCAGTTATGTTTCCTGCATCTCCTGGGCTCTGGGGCTTTGGTTCTGTCTACAAGGCA  
ACTTACCAAGGAGCTACAGTGGCTGTAAAACAAGTGAAGAGATGCAGTAAGAACCATTTG  
GCATCACGGCAAAGCTTCTGGGCAGAACTAAATGTAGCACGCCTTGACCATAACAATGTG  
GTACACATAGTAGCTGCTAGCACATGTACCCCTGCTAGTCAGGATAGTCTGGGTACCATA  
ATTATGGAATATGCAGGTAATTGCACTCTACATCATATTATCTATGGGATTGGCTATTTA  
ACAGGAAATAACAATGATGGCCTTCAATGTGATCTTGAGTTCTTGACTACAGCTCAGGCT  
GTCATTTACGCCTGTGATATTGTGGCAGGCTTAATGTTTCTCCATTCTCAGTTAATTGTG  
CATCTGGATTTAAAACCTGCTAACATATTCATCACAGAACATAGTGTTTGCAAAATTGGA  
GACTTTGGATGCTCCCAAAGCTAGAAGATAGTGAATCATCAGGACTACATCTTTGTCAT  
CAAGGGGGGAACATACACACATCGTGCTCCTGAACTTCTTAAAGGTGAGAAAATCACAACC  
CA

>MZ712299\_LSUHC9098\_[Asthenodipsas\_lasgalenensis]

AGCTGCTCTGGGGGCTTTGGTTCTGTCTACAAGGCAACTTACCAAGGAGCTATAGTTGCT  
GTAAAACAAGTGAAGAGATGCAGTAAGAACCATTTGGCATCCCGGCAAAGCTTCTGGGCT  
GAACTAAATGTAGCACGTCTTGACCATAACAATGTGGTACGCATAGTAGCTGCTAGCACA  
TGTACCCCTGCTAGTCAGGATAGTTTGGGTACCATAATTATGGAATATGCAGGTCATTGC  
ACTCTACATCATATTATCTATTGGACTGGCTATTTAACAGATAATAACAACGATGGCCTT  
CAATGTGATCATGAGTTTTTGGAGTACAGCTCAGGCTGTCATTTACGCCTGTGATATTGTG  
GCAGGGTTAATGTTTCTCCATTCTCAGTTAATCGTGCATCTGGATTTAAACCTGCTAAC  
ATATTCATCACAGAACATAATGTTTGCAAATTGGAGACTTTGGATCCTCCCAAAGCTG  
GAAGATAGTGAATCATCAGGACTACATCTTTATCATCAAGGGGGAACATACACACATCGT  
GCTCCTGAACTTCTTAAAGGTGAGAAAACCCCCCAA

>MZ712300\_Avpt\_[Asthenodipsas\_vertebralis]

AGCTGCTCTGGGGGCTTTGGTTCTGTCTACAAGGCAACTTACCAAGGAGCTACAGTTGCT  
GTAAAACAAGTGAAGAGATGCAGTAAGAACCATTTGGCATCCCGGCAAAGCTTCTGGGCT  
GAACTAAATGTAGCACGTCTTGACCATAACAATGTGGTACGCATAGTAGCTGCTAGCACA  
TGTACCCCTGCTAGTCAGGATAGTTTGGGTACCATAATTATGGAATATGCAGGTCATTGC  
ACTCTACATCATATTATCTATTGGACTGGCTATTTAACAGATAATAACAACGATGGCCTT  
CAATGTGATCATGAGTTTTTGGAGTACAGCTCAGGCTGTCATTTACGCCTGTGATATTGTG  
GCAGGGTTAATGTTTCTCCATTCTCAGTTAATCGTGCATCTGGATTTAAACCTGCTAAC  
ATATTCATCACAGAACATAATGTTTGCAAATTGGAGACTTTGGATCCTCCCAAAGCTG  
GAAGATAGTGAATCATCAGGACTACATCTTTATCATCAAGGGGGAACATACACACATCGT  
GCTCCTGAACTTCTTAAAGGTGAGAAAACCCCCCAA

**RAG-1 nuDNA gene**

>MZ712301\_CAS235254\_[Pareas\_victorianus]

GACAGCCACCAGGCTAACTCTGCTAAAGAAAATGCAACAGGTTCTATGGACGTCCTGAT  
GAACAACCTAAGGCAGCAGCTATAATGTCACAAGTGCCCTTTGAAACAGGCACTGAGTTG  
AATAAAAATAGCTTGGCAAGAGAGAAAGATGTCTTTCACATGAACCAAAGGGAGGTGGAA  
GCTCACCAAGCAAATCTGCAGTGCCTCTGTGCATCTGTGGAGGCTCATTGAAAACCTGAT  
CCTTGCAAAAAGTTTCATCCAGTTCATGGACCAGTGGACGAGGAGACCCAGGCTCTTTTG

AGAAAGAAAGAAAAAGAGCCACTTCTTGGCCAGATCTTCTTGCCAAAGTTTTTAAGATT  
GATGTACGGGGAGATATTGACACAACCCATCCTACTCGTTTTTGTACAATTGTTGGAAA  
GTGATTCAAAGAAAAGTCAGCAATGCCCCCATGAAGCAGATCTTCTAGGGAAAGACCCA  
GTGGAGTGGCGGTCCCATTCAACAAGCTGTGACATTTGTGTCACTTCCTTTCTGTTGGAGTC  
AAGAGAAAGAAACCAATGCTGAATTCACAGCTGAGCAAAAACTCAGGATTATTGCTGGA  
CGTGCGAGAAAAATAAGATGCATAAGAAAGGTAAAGCAGCTGAAAAACAAAAGTTTAATG  
AAAAAGATTTCAAAGTGAAGCAAATCCATCTCAGTACAAAAGCCCTTGCAATAGATTAT  
CCTGTGGACTTTGTAAAGTCAATATCTTGCCAGATCTGTGAACACATCCTGTCCGATCCA  
GTAGAAACAACATGTAAACACTTATTCTGTAGAGTTTGCATTCTTAAATGCCTTAAAGTA  
ATGGGAAGCTATTGCCATCCTGCCAATATCCTTGCTTCCTACTGATCTAGTGAGTCCT  
GTAAAATCCTCCTAAACATCCTCAACAATTTGGTTTTGAGATGCCCAATAAAAGGCTGT  
CATGAGGATGTCTTTTTGGAAAAATACTGCCAACATCGTTCTAACCATAAAGAGGCGGAA  
AGC

>MZ712302\_ZMMUR16631\_[Pareas\_monticola]

GACAGCCACCAGGCTAACTCTGCTAAAGAAAATGCAACAAGTTCTATGGACGTCCTGAT  
GAACAACCTAGGGCAGCAGCTGTAATGTCACAAGTGCCCTTTGAAACAGGCACTGAGTTG  
AATAAAAATAGCTTGGCAAGAGAGAAAAGATGTCTTTCACATGAGCCAAAGGGAGGTGGAA  
GCTCACCAAGCAAATCTGCAGTGCCTCTGTGCGATCTGTGGAGGCTCACTGAAAAGTATGAT  
CCTTGCAAAAAGTTTCATCCAGTTCATGGACCAGTGGACGAGGAGACCCAGGCTCTTTTG  
AGAAAGAAAGAAAAAGAGCCACTTCTTGGCCAGATCTTCTTGCCAAAGTTTTTAAGATT  
GATGTACGGGGAGATATTGACACAACCCATCCGACTCGTTTTTGTACAATTGTTGGAAA  
GTGATTCAAAGAAAAGTCAGCAATGCCCCCATGAAGCACATCTTCTAGGGAAAGACCCA  
GTGGAGTGGCGGTCCCATTCAACAAGCTGTGACATTTGTGTCACTTCCTTTCTGTTGGAGTC  
AAGAGAAAGAAACCAATGCTGAATTCACAGCTGAGCAAAAACTCAGGATTATTGCTGGA  
CGTACGAGAAAAATAAGATGCATAAGAAAGGTAAAGCAGCTGAAAAACAAAAGTTTAATG  
AAAAAGATTTCAAAGTGAAGCAAATCCATCTCAGTACAAAAGCCCTTGCAATAGATTAT  
CCTGTGGACTTTGTAAAGTCAATATCTTGCCAGATCTGTGAACACATCTTGTCCGATCCA  
GTAGAAACAACATGTAAACACTTATTCTGTAGAGTTTGCATTCTTAAATGCCTTAAAGTA  
ATGGGAAGCTATTGCCATCCTGCCAATATCCTTGCTTCCTACTGATCTAGTGAGTCCT

GTAAAATCCTTCCTAACATCCTCAACAATTTGGTTTTGAGATGCCCAATAAAAGGCTGT  
CATGAGGATGTCGTTTTGGAAAAATACTGCCAACATCGTTCTAACCATAAAGAGGTGGAA  
AGC

>MZ712303\_CAS235359\_[Pareas\_andersonii]

GACAGCCACCAGGCTAACTCTGCGAAAAGAAAATGCAACAGGTTCTATGGACGTCCTGAT  
GAACAACCTAAGGCAGCAGCTGTAATGTCACAAGTGCCCTTTGAAACAGGCACTGAGTTG  
AATAAAAATAGCTTGGAAGAGAGAAAAGATGACTTTACATGAGCCAAAGGGAGGTGGAA  
GCTCACCAAGCAAATCTGCAGTGCCTCTGTGCATCTGTGGAAGCTCACTGAAAAGTAC  
CCTTGCAAAAAGTGCATCCAGTTCATGGACCAGTGGACGAGGAGACCCAGGCTCTTTTG  
AGAAAGAAAGAAAAAGAGCCACTTCTTGCCAGATCTTCTTGCCAAAGTTTTTAAGATT  
GATGTACGAGGAGATATCGACACAACCCATCCTACTCGTTTTTGTACAATTGTTGGAAA  
GTGATTCAAAGAAAAGTCAGCAATGCCCCCATGAAGCACATCTTCTAGGGAAAGACCCA  
GTGGAGTGGCAGTCCCATTCAACAAGCTGTGACATTTGTGTCCTTCTCGTGGAGTC  
AAGAGAAAGAAACCCATGCTGAATTCACAGCTGAGCAAAAAACTTCGGATTATTGCTGGA  
CGTACGAGAAAAATAAGATGCATAAGAAAGGTAAAGCAGCTGAAAAACAAAAGTTAATG  
AAAAAGATTTCAAAGTAAAGCAAATCCATCTCAGTACAAAATCCCTTGCAATAGATTAT  
CCTATGGACTTTGTAAAGTCAATATCTTGCCAGATCTGTGAACACATCCTGTCCGATCCA  
GTAGAAACAACATGTAAACACTTGTTCTGTAGAGTCTGCATTCTTAAATGCCTTAATGTA  
ATGGGAAGCTATTGCCATCCTGCCAATATCCTTGCTTCTACTGATCTAGTGAGTCT  
GTAAAATCCTTCCTAACATCCTCAACAATTTGGTTTTGAGATGCCCAATAAAAGGCTGT  
CATGAGGATGTCCTTTTTGGAAAAATACTGCCAACATCGTTCTAATCATAAAGAGGCGGAA  
AGC

>MZ712304\_ZMMUR13451\_[Pareas\_margaritophorus]

GACAGCCACCAGGCTAACTCTGCTAAAGAAAATGCAACAGGTTCTATGGACGTCCTGAT  
GAACAACCTAAGGCAGCAGCTGTAATGTCACAAGTGCCCTTTGAAACAGGCACTGAGTTG  
AATAAAAATAGCTTGGAAGAGAGAAAAGATGTCTTTACATGAGCCAAAGGGAGGTGGAA  
GCTCACCAAGCAAATCTGCAGTGCCTCTGTGCATCTGTGGAAGCTCACTGAAAAGTAC  
CCTTGCGCAAAGTGCATCCAGTCCATGGACCAGTGGACGAGGAGACCCAGGCTCTTTTG  
AGAAAGAAAGAAAAAGAGCCACTTCTTGCCAGATCTTCTTGCCAAAGTTTTTAAGATT

GATGTACGGGGAGATATCGACACAACCCATCCTACTCGTTTTTGTACAATTGTTGGAAA  
GTGATTCAAAGAAAAGTCAGCAATGCCCCCATGAAGCACATCTTCTAGGGAAAGACCCA  
GTGGAGTGGCGGTCCCATTCAACAAGCTGTGACGTTTGTGTCATTCCTTTTCGTGGAGTC  
AAGAGAAAGAAAACCCATGTTGAATTCACAGCTGAGCAAAAACTCCGGATTATTGCTGGA  
CGTACGAGAAAAATAAGATGCATAAGAAAGGTAAAGCAGCTGAAAAACAAAAGTTTAATG  
AAAAAGATTTTGAAGTCAATATCTTGCCAGATCTGTGAACACATCCTGTCCGATCCA  
GTAGAAACAACATGTAAACACTTTTTCTGTAGAGTCTGCATTCTTAAATGCCTTAATGTA  
ATGGGAAGCTATTGCCATCCTGCCAATATCCTTGCTTTTCTACTGATCTAGTGAGTCCT  
GTAAAATCCTTCCTAAACATCCTCAACAATTTGGTTTTGAGATGCCCAATAAAAGGCTGT  
CATGAGGATGTCTTTTTGGAAAAATACTGCCAACATCGTTCTAATCATAAAGAGGCGGAA  
AGC

>MZ712305\_ZMMUNAP09759\_[Pareas\_margaritophorus]

GACAGCCACCAGGCTAACTCTGCGAAAGAAAATGCAGCAGGTTCTATGGACGTCACTGAT  
GAACAACCTAAGGCAGCAGCTGTAATGTCACAAGTGCCCTTTGAAACAGGCACTGAGTTG  
AATAAAAATAGCTTGGAAGAGAGAAAAGATGTCTTTCACATGAGCCAAAGGGAGGTGGAA  
GCTCACCAAGCAAATCTGCAGTGCCTCTGTGCGATCTGTGGAAGCTCACTGAAAACCTGAT  
CCTTGCGCAAAGTGTCATCCAGTTCATGGACCAGTGGACGAGGAGACCCAGGCTCTTTTG  
AGAAAGAAAGAAAAAGAGCCACTTCTTGCCAGATCTTCTTGCCAAAGTTTTTAAGATT  
GATGTACGAGGAGATATCGACACAACCCATCCTACTCGTTTTTGTACAATTGCTGGAAA  
GTGATTCAAAGAAAAGTCAGCAATGCCCCCATGAAGCACATCTTCTAGGGAAAGACCCA  
GTGGAGTGGCGGTCCCATTCAACAAGCTGTGACGTTTGTGTCATTCCTTTTCGTGGAGTC  
AAGAGAAAGAAAACCCATGCTGAATTCACAGCTGAGCAAAAACTCCGGATTATTGCTGGA  
CGTACGAGAAAAATAAGATGCATAAGAAAGGTAAAGCAGCTGAAAAACAAAAGTTTAATG  
AAAAAGATTTTGAAGTCAATATCTTGCCAGATCTGTGAACACATCCTGTCCGATCCA  
GTAGAAACAACATGTAAACACTTGTCTGTAGAGTCTGCATTCTTAAATGCCTTAATGTA  
ATGGGAAGCTATTGCCATCCTGCCAATATCCTTGCTTTTCTACTGATCTAGTGAGTCCT  
GTAAAATCCTTCCTAAACATCCTCAACAATTTGGTTTTGAGATGCCCAATAAAAGGCTGT

CATGAGGATGTCTTTTTGGAAAATACTGCCAACATCGTTCTAATCATAAAGAGGCGGAA  
AGC

>MZ712306\_ZMMUR16628\_[Pareas\_macularius]

GACAGCCACCAGGCTAACTCTGCGAAAAGAAAATCCAGCAGGTTCTATGGACGTCCTGAT  
GAACAACCTAAGGCAGCAGCTGTAATGTCACAAGTGCCCTTTGAAACAGGCACTGAGTTG  
AATAAAAATAGCTTGGCAAGAGAGAAAAGATGTCTTTCACATGAGCCAACGGGAGGTGGAA  
GCTCACCAAGCAAATCTGCAGTGCCTCTGTGCATCTGTGGAAGCTCACTGAAAAGTATGAT  
CCTTGCAAAAAGTGTATCCAGTTCATGGACCAGTGGACGAGGAGACCCAGGCTCTTTTG  
AGAAAGAAAGAAAAAGAGCCACTTCTTGCCAGATCTTCTTGCCAAAGTTTTTAAGATT  
GATGTACGAGGAGATATTGACACAACCCATCCTACTCGTTTTTGTACAATTGTTGGAAA  
GTGATTCAAAGAAAAGTCAGCAATGCCCCCATGAAGCACATCTTCTAGGGAAAGACCCA  
GTGGAGTGGCGGTCCATTCAACAAGCTGTGACGTTTGTGTTACTTCCTTTCGTGGAGTC  
AAGAGAAAGAAAACCCATGCTGAATTCACAGCTGAGCAAAAAACTCCGGATTATTGCTGGA  
CGTACGAGAAAATAAGATGCATAAGAAAGGTAAAGCAGCTGAAAACAAAAGTTTAATG  
AAAAAGATTTCAAAGTAAAGCAAATCCATCTCAGTACAAAATCCCTTGCAATAGATTAT  
CCTGTGGACTTTGTAAAGTCAATATCTTGCCAGATCTGTGAACACATCCTGTCCGATCCA  
GTAGAAACAACATGTAAACACTTGTCTGTAAAGTCTGCATTCTTAAATGCCTTAATGTA  
ATGGGAAGCTATTGCCATCCTGCCAATATCCTTGCTTTCCTACTGATCTAGTGAGTCTT  
GTAAAATCCTTCTAAACATCCTCAACAATTTGGTTTTGAGATGCCAATAAAAGGCTGT  
CATGAGGATGTCTTTTTGGAAAATACTGCCAACATCGTTCTAATCATAAAGAGGCGGAA  
AGC

>MZ712307\_ZMMUR16629\_[Pareas\_macularius]

GACAGCCACCAGGCTAACTCTGCGAAAAGAAAATGCAACAGGTTCTATGGACGTCCTGAT  
GAACAACCTAAGGCAGCAGCTGTAATGTCACAAGTGCCCTTTGAAACAGGCACTGAGTTG  
AATAAAAATAGCTTGGCAAGAGAGAAAAGATGTCTTTCACATGAGCCAAGGGAGGTGGAA  
GCTCACCAAGCAAATCTGCAGTGCCTCTGTGCATCTGTGGAAGCTCACTGAAAAGTATGAT  
CCTTGCAAAAAGTGTATCCAGTTCATGGACCAGTGGACGAGGAGACCCAGGCTCTTTTG  
AGAAAGAAAGAAAAAGAGCCACTTCTTGCCAGATCTTCTTGCCAAAGTTTTTAAGATT  
GATGTACGAGGAGATATCGACACGACCCATCCTACTCGTTTTTGTACAATTGTTGGAAA



GTGATTCAAAGAAAAGTCAGCAATGCCCCCATGAAGCACATCTTCTAGGGAAAGACCCA  
GTGGAGTGGCGGTCCCATTCAACAAGCTGTGACGTTTGTGTCACTTCCTTTCGTGGAGTC  
AAGAGAAAGAAACCCATGCTGAATTCACAGCTGAGCAAAAACTCCGGATTATTGCTGGA  
CGTACGAGAAAAATGAGATGCATAAGAAAGGTAAAGCAGCTGAAAAACAAAAGTTTAATG  
AAAAAGATTTCAAAGTAAAGCAATCCATCTCAGTACAAAATCCCTTGCAATAGATTAT  
CCTGTGGACTTTGTAAAGTCAATATCTTGCCAGATCTGTGAACACATTCTGTCCGATCCA  
GTAGAAACAACATGTAAACACTTGTTCTGTAGAGTCTGCATTCTTAAATGCCTTAATGTA  
ATGGGAAGCTATTGCCATCCTGCCAATATCCTTGCTTTCCTACTGATCTAGTGAGTCT  
GTAAAATCCTTCCTAAACATCCTCAACAATTTGGTTTTGAGATGCCCAATAAAAGGCTGT  
CATGAGGATGTCTTTTTGGAAAATACTGCCAACATCGTTCTAATCATAAAGAGGCGGAA  
AGC

>MZ712308\_CAS248147\_[Pareas\_vindumi]

GACAGCCACCAGGCTAACTCTGCGAAAAGAAAATCCAACAGGTTCTATGGACGTCCTGAT  
GAACAACCTAAGGCAGCAGCTGTAATGTCACAAGCGCCCTTTGAAACAGGCACTGAGTTG  
AATAAAAATAGCTTGGCAAGAGAGAAAAGATGTCTTTCACATGAGCCGAAGGGAGGTGGAA  
GCTCACCAAGCAAATCTGCAGTGCCTCTGTGCGATCTGTGGAGGCTCACTGAAAAGTAT  
CCTTGCAAAAAGTGTGATCCAGTTCATGGACCAAGTGGACGAGGAGACCCAGGCTCTTTTG  
AGAAAGAAAGAAAAAGAGCCACTTCTTGGCCAGATCTTCTTGCCAAAGTTTTTAAGATT  
GATGTACGGGGAGATATCGACACAACCCATCCTACTCGTTTTTGTGACAATTGTTGGAAA  
GTGATTCAAAGAAAAGTCAGCAATGCCCCCATGAAGCACATCTTCTAGGGAAAGACCCA  
GTGGAGTGGCGGTCCCATTCAACAAGCTGTGATGTTTGTGTCACTTCCTTTCGTGGAGTC  
AAGAGAAAGAAACCCATGCTGAATTCACAGCTGAGCAAAAACTCAGGATTAATGCTGGA  
CGTACGAGAAAAATAAGATGCATAAGAAAGGTAAAGCAGCTGAAAAACAAAAGTTTAATG  
AAAAAGATTTCAAAGTAAAGCAATCCACCTCAGTACAAAATCCCTTGCAATAGATTAT  
CCTGTGGACTTTGTAAAGTCAATATCTTGCCAGATCTGTGAACACATCCTGTCCGATCCA  
GTAGAAACAACATGTAAACACTTATTCTGTAGAGTCTGCATTCTTAAATGCCTTAAAGTA  
ATGGGAAGCTATTGCCATCCTGCCAATATCCTTGCTTTCCTACTGATCTAGTGACTCCT  
GTAAAATCCTTCCTAAACATCCTGAACAATTTGGTTTTGAGATGCCCAATAAAAGGCTGT  
CATGAGGATGTCTTTTTGGAAAATACTGCCAACATCGTTCTAATCATAAAGAGGCGGAA

AGC

>MZ712309\_ZMMUNAP09088\_[Pareas\_hamptoni]

GACAGCCACCAGGCTAACTCTGCGAAAAGAAAATCCAGCAGGTTCTATGGACGTCCTGAT  
GAACAACCTAAGGCAGCAGCTGTAATGTCACAAGCGCCCTTTGAAACAGGCACTGAGTTG  
AATAAAAATAGCTTGGCAAGAGAGAAAAGATGTCTTTCACATGAGCCGAAGGGAGGTGGAA  
GCTCACCAAGCAAATCTGCAGTGCCTCTGTGCGATCTGTGGAGGCTCCCTGAAAAGTAT  
CCTTGCAAAAAGTGTATCCAGTTCATGGACCAGTGGACGAGGAGACCCAGGCTCTTTTG  
AGAAAGAAAGAAAAAGAGCCACTTCTTGGCCAGATCTTCTTGCCAAAGTTTTTAAGATT  
GATGTACGGGGAGATATCGACACAACCCATCCTACTCGTTTTTGTACAATTGTTGGAAA  
GTGATTCAAAGAAAAGTCAGCAATGCCCCCATGAAGCACATCTTCTAGGGAAAGACCCA  
GTGGAGTGGCGGTCTCATTCAACAAGCTGTGATGTTTGTGCACTTCCTTCGTGGAGTC  
AAGAGAAAGAAACCCATGATGAATTCACAGCTGAGCAAAAAACTCAGGATTATTGCTGGA  
CGTACGAGAAAAATAAGATGCATAAGAAAGGTAAAGCAGCTGAAAAACAAAAGTTTAATG  
AAAAAGATTTCAAAGTAAAGCAATCCATCTCAGTACAAAATCCCTTGCAATAGATTAT  
CCTGTGGACTTTGTAAAGTCAATATCTTGCCAGATCTGTGAACACATCCTGTCCGATCCA  
GTAGAACTACATGTAAACACTTATTCTGTAGAGTTTGCATTCTTAAATGCCTTAAAGTA  
ATGGGAAGCTATTGCCATCCTGCCAATATCCTTGCTTTCCTACTGATCTAGTGAGTCT  
GTAAAATCCTTCCTAAACATCCTCAACAATTTGGTTTTGAGATGCCCAATAAAAGGCTGT  
CATGAGGATGTCTTTTTGAAAAATACTGCCAACATCGTTCTAATCATAAAGAGGTGGAA

AGC

>MZ712310\_ZMMUR16478\_[Pareas\_geminatus]

GACAGCCACCAGGCTAACTCTGCGAAAAGAAAATGCAACAGGTTCTATGGACGTCCTGAT  
GAACAACCTAAGGCAGCAGCTGTAATGTCACAAGCGCCCTTTGAAACAGGCACTGAGTTG  
AATAAAAATAGCTTGGCAAGAGAGAAAAGATGTCTTTCACATGAGCCGAAGGGAGGTGGAA  
GCTCACCAAGCAAATCTGCAGTGCCTCTGTGCGATTTGTGGAGGCTCCCTGAAAAGTAT  
CCTTGCAAAAAGTGTATCCAGTTCATGGACCAGTGGATGAGGAGACCCAGGCTCTTTTG  
AGAAAGAAAGAAAAAGAGCCACTTCTTGGCCAGATCTTCTTGCCAAAGTTTTTAAGATT  
GATGTACGGGGAGATATCGACACAACCCATCCTACTCGTTTTTGTACAATTGTTGGAAA  
GTGATTCAAAGAAAAGTCAGCAATGCCCCCATGAAGCACATCTTCTAGGGAAAGACCCA

GTGGAGTGGCGGTCTCATTCAACAAGCTGTGACGTTTGTGTCACCTTCCTTCGTGGAGTC  
AAGAGAAAGAAACCCATGCTGAATTCACAGCTGAGCAAAAACTCAGGATTATTGCTGGA  
CGTACGAGAAAAATAAGATGCATAAGAAAGGTAAAGCAGCTGAAAAACAAAAGTTAATG  
AAAAAGATTTCAAAGTGTAAAGCAAATCCATCTCAGTACAAAATCCCTTGCAATAGATTAT  
CCTGTGGACTTTGTAAAGTCAATATCTTGCCAGATCTGTGAACACATCCTGTCCGATCCA  
GTAGAAACAACATGTAAACACTTATTCTGTAGAGTCTGCATTCTTAAATGCCTTAAAGTA  
ATGGGAAGCTATTGCCATCCTGCCAATATCCTTGCTTCCTACTGATCTAGTGAGTCCT  
GTAAAATCCTTCCTAAACATCCTCAACAATTTGGTTTTGAGATGCCCAATAAAAGGCTGT  
CATGAGGATGTCTTTTTGGAAAAATACTGCCAACATCGTTCTAATCATAAAGAGGCGGAA  
AGC

>MZ712311\_ZMMUNAP09280\_[*Pareas\_geminatus*]

GACAGCCACCAGGCTAACTCTGCGAAAGAAAATGCAACAGGTTCTATGGACGTCACCTGAT  
GAACAACCTAAGGCAGCAGCTGTAATGTCACAAGCGCCCTTTGAAACAGGCACTGAGTTG  
AATAAAAATAGCTTGGCAAGAGAGAAAGATGTCTTTCACATGAGCCGAAGGGAGGTGGAA  
GCTCACCAAGCAAATCTGCAGTGCCTCTGTGCGATTTGTGGAGGCTCCCTGAAAAGTAT  
CCTTGCAAAAAGTGCATCCAGTTCATGGACCAGTGGATGAGGAGACCCAGGCTCTTTTG  
AGAAAGAAAGAAAAAGAGCCACTTCATGGCCAGATCTTCTTGCCAAAGTTTTTAAGATT  
GATGTACGGGGAGATATCGACACAACCCATCCTACTCGTTTTTGTGACAATTGTTGGAAA  
GTGATTCAAAGAAAAGTCAGCAATGCCCCCATGAAGCACATCTTCTAGGGAAAGACCCA  
GTGGAGTGGCGGTCTCATTCAACAAGCTGTGACGTTTGTGTCACCTTCCTTCGTGGAGTC  
AAGAGAAAGAAACCCATGCTGAATTCACAGCTGAGCAAAAACTCAGGATTATTGCTGGA  
CGTACGAGAAAAATAAGATGCATAAGAAAGGTAAAGCAGCTGAAAAACAAAAGTTAATG  
AAAAAGATTTCAAAGTGTAAAGCAAATCCATCTCAGTACAAAATCCCTTGCAATAGATTAT  
CCTGTGGACTTTGTAAAGTCAATATCTTGCCAGATCTGTGAACACATCCTGTCCGATCCA  
GTAGAAACAACATGTAAACACTTATTCTGTAGAGTCTGCATTCTTAAATGCCTTAAAGTA  
ATGGGAAGCTATTGCCATCCTGCCAATATCCTTGCTTCCTACTGATCTAGTGAGTCCT  
GTAAAATCCTTCCTAAACATCCTCAACAATTTGGTTTTGAGATGCCCAATAAAAGGCTGT  
CATGAGGATGTCTTTTTGGAAAAATACTGCCAACATCGTTCTAATCATAAAGAGGCGGAA  
AGC

>MZ712312\_FMNH255567\_[Pareas\_formosensis]

GACAGCCACCAGGCTAACTCTGCGAAAAGAAAATCCAGCAGGTTCTATGGACATCACTGAT  
GAACAACCTAAGGCAGCAGCTGTAATGTCACAAGCGCCCTTTGAAACAGGCACTGAGTTG  
AATAAAAATAGCTTGGCAAGAGAGAAAAGATGTCTTTCACATGAGCCGAAGGGAGGTGGAA  
GCTCACCAAGCAAATCTGCAGTGCCTCTGTGCGCATCTGTGGAGGCTCCCTGAAAAGCTGAT  
CCTTGCAAAAAGTGTTCATCCAGTTCATGGACCAGTGGACGAGGAGACCCAGGCTCTTTTG  
AGAAAGAAAGAAAAAAGAGCCACTTCTTGCCAGATCTTCTTGCCAAAGTTTTTAAGATT  
GATGTACGGGAAGATATCGACACAACCCATCCTACTCGTTTTTGTGACAATTGTTGGAAA  
GTGATTCAAAGAAAAGTCAGCAATGCCCCCATGAAGCACATCTTCTAGGGAAAGACCCA  
GTGGAGTGGCGGTCTCATTCAACAAGCTGTGACGTTTGTGTCACTTCCTTCGTGGAGTC  
AAGAGAAAGAAACCCATGATGAATTCACAGCTGAGCAAAAAACTCAGGATTATTGCTGGA  
CGTACGAGAAAAATAAGATGCATAAGAAAGGTAAAGCAGCTGAAAAACAAAAGTTTAATG  
AAAAAGATTTCAAAGTGAAGCAAATCCATCTCAGTACAAAATCCCTTGCAATAGATTAT  
CCTGTGGACTTTGTAAAGTCAATATCTTGCCAGATTTGTGAACACATCCTGTCCGATCCA  
GTAGAAACAACATGTAACACTTATTCTGTAGAGTCTGCATTCTTAAATGCCTTAAAGTA  
ATGGGAAGCTATTGCCATCCTGCCAATATCCTTGCTTCCTACTGATCTAGTGAGTCCT  
GTAAAATCCTTCCTAAACATCCTCAACAATTTGGTTTTGAGATGCCCAATAAAAGGCTGT  
CATGAGGATGTCTTTTTGGAAAAATACTGCCAACATCGTTCTAATCATAAAGAGGCGGAA  
AGC

>MZ712313\_ZMMUNAP07265\_[Pareas\_formosensis]

GACAGCCACCAGGCTAACTCTGCGAAAAGAAAATCCAGCAGGTTCTATGGACATCACTGAT  
GAACAACCTAAGGCAGCAGCTGTAATGTCACAAGCGCCCTTTGAAACAGGCACTGAGTTG  
AATAAAAATAGCTTGGCAAGAGAGAAAAGATGTCTTTCACATGAGCCGAAGGGAGGTGGAA  
GCTCACCAAGCAAATCTGCAGTGCCTCTGTGCGCATCTGTGGAGGCTCCCTGAAAAGCTGAT  
CCTTGCAAAAAGTGTTCATCCAGTTCATGGACCAGTGGACGAGGAGACCCAGGCTCTTTTG  
AGAAAGAAAGAAAAAAGAGCCACTTCTTGCCAGATCTTCTTGCCAAAGTTTTTAAGATT  
GATGTACGGGAAGATATCGACACAACCCATCCTACTCGTTTTTGTGACAATTGTTGGAAA  
GTGATTCAAAGAAAAGTCAGCAATGCCCCCATGAAGCACATCTTCTAGGGAAAGACCCA  
GTGGAGTGGCGGTCTCATTCAACAAGCTGTGACGTTTGTGTCACTTCCTTCGTGGAGTC

AAGAGAAAGAAACCCATGATGAATTCACAGCTGAGCAAAAACTCAGGATTATTGCTGGA  
CGTACGAGAAAAATAAGATGCATAAGAAAGGTAAAGCAGCTGAAAAACAAAAGTTTAATG  
AAAAAGATTTCAAAGTAAAGTCAATATCTTGCCAGATTTGTGAACACATCCTGTCCGATCCA  
CCTGTGGACTTTGTAAAGTCAATATCTTGCCAGATTTGTGAACACATCCTGTCCGATCCA  
GTAGAAACAACATGTAAACACTTATTCTGTAGAGTCTGCATTCTTAAATGCCTTAAAGTA  
ATGGGAAGCTATTGCCATCCTGCCAATATCCTTGCTTCCTACTGATCTAGTGAGTCCT  
GTAAAATCCTTCCTAAACATCCTCAACAATTTGGTTTTGAGATGCCCAATAAAAGGCTGT  
CATGAGGATGTCTTTTTGGAAAAATACTGCCAACATCGTTCTAATCATAAAGAGGCGGAA  
AGC

>MZ712314\_NMNH05637\_[Pareas\_formosensis]

GACAGCCACCAGGCTAACTCTGCGAAAGAAAATCCAGCAGGTTCTATGGACATCACTGAT  
GAACAACCTAAGGCAGCAGCTGTAATGTCACAAGCGCCCTTTGAAACAGGCACTGAGTTG  
AATAAAAATAGCTTGGCAAGAGAGAAAGATGTCTTTCACATGAGCCGAAGGGAGGTGGAA  
GCTCACCAAGCAAATCTGCAGTGCCTCTGTGCGATCTGTGGAGGCTCCCTGAAAAGTAT  
CCTTGCAAAAAGTGTATCCAGTTCATGGACCAGTGGACGAGGAGACCCAGGCTCTTTTG  
AGAAAGAAAGAAAAAGAGCCACTTCTTGCCAGATCTTCTTGCCAAAGTTTTTAAGATT  
GATGTACGGGAAGATATCGACACAACCCATCCTACTCGTTTTTGTCACAATTGTTGGAAA  
GTGATTCAAAGAAAAGTCAGCAATGCCCCCATGAAGCACATCTTCTAGGGAAAGACCCA  
GTGGAGTGGCGGTCTCATTCAACAAGCTGTGACGTTTGTGTCACTTCCTTCGTGGAGTC  
AAGAGAAAGAAACCCATGATGAATTCACAGCTGAGCAAAAACTCAGGATTATTGCTGGA  
CGTACGAGAAAAATAAGATGCATAAGAAAGGTAAAGCAGCTGAAAAACAAAAGTTTAATG  
AAAAAGATTTCAAAGTAAAGTCAATATCTTGCCAGATTTGTGAACACATCCTGTCCGATCCA  
GTAGAAACAACATGTAAACACTTATTCTGTAGAGTCTGCATTCTTAAATGCCTTAAAGTA  
ATGGGAAGCTATTGCCATCCTGCCAATATCCTTGCTTCCTACTGATCTAGTGAGTCCT  
GTAAAATCCTTCCTAAACATCCTCAACAATTTGGTTTTGAGATGCCCAATAAAAGGCTGT  
CATGAGGATGTCTTTTTGGAAAAATACTGCCAACATCGTTCTAATCATAAAGAGGCGGAA  
AGC

>MZ712315\_ZMMUNAP08868\_[Pareas\_formosensis]

GACAGCCACCAGGCTAACTCTGCGAAAGAAAATCCAGCAGGTTCTATGGACGTCCTGAT  
GAACAACCTAAGGCAGCAGCTGTAATGTCACAAGCGCCCTTTGAAACAGGCACTGAGTTG  
AATAAAAATAGCTTGGCAAGAGAGAAAAGATGTCTTTCACATGAGCCGAAGGGAGGTGGAA  
GCTCACCAAGCAAATCTGCAGTGCCTCTGTGCGATCTGTGGAGGCTCCCTGAAAAGTAT  
CCTTGCAAAAAGTGTCTCCAGTTCATGGACCAGTGGACGCGGAGACCCAGGCTCTTTTG  
AGAAAGAAAGAAAAAGAGCCACTTCTTGGCCAGATCTTCTTGCCAAAGTTTTTAAGATT  
GATGTACGGGGAGATATCGACACAACCCATCCTACTCGTTTTTGTACAATTGTTGGAAA  
GTGATTCAAAGAAAAGTCAGCAATGCCCCCATGAAGCACATCTTCTAGGGAAAGACCCA  
GTGGAGTGGCGGTCTCATTCAACAAGCTGTGACGTTTGTGTCACTTCCTTTCGTGGAGTC  
AAGAGAAAGAAACCCATGATGAATTCACAGCTGAGCAAAAACTCAGGATTATTGCTGGA  
CGTACGAGAAAAATAAGATGCATAAGAAAGGTAAAGCAGCTGAAAAACAAAAGTTAATG  
AAAAAGATTTCAAAGTAAAGCAAATCCATCTCAGTACAAAATCCCTTGCAATAGATTAT  
CCTGTGGACTTTGTAAAGTCAATATCTTGCCAGATCTGTGAACACATCCTGTCCGATCCA  
GTAGAAACAACATGTAAACACTTATTCTGTAGAGTCTGCATTCTTAAATGCCTTAAAGTA  
ATGGGAAGCTATTGCCATCCTGCCAATATCCTTGCTTTCCTACTGATCTAGTGAGTCCT  
GTAAAATCCTCCTAACATCCTCAACAATTTGGTTTTGAGATGCCCAATAAAAGGCTGT  
CATGAGGATGTCTTTTTGGAAAAATACTGCCAACATCGTTCTAATCATAAAGAGGCGGAA  
AGC

>MZ712316\_ZMMUR14072\_[Pareas\_formosensis]

GACAGCCACCAGGCTAACTCTGCGAAAGAAAATCCAGCAGGTTCTATGGACGTCCTGAT  
GAACAACCTAAGGCAGCAGCTGTAATGTCACAAGCGCCCTTTGAAACAGGCACTGAGTTG  
AATAAAAATAGCTTGGCAAGAGAGAAAAGATGTCTTTCACATGAGCCGAAGGGAGGTGGAA  
GCTCACCAAGCAAATCTGCAGTGCCTCTGTGCGATCTGTGGAGGCTCCCTGAAAAGTAT  
CCTTGCAAAAAGTGTCTCCAGTTCATGGACCAGTGGACGCGGAGACCCAGGCTCTTTTG  
AGAAAGAAAGAAAAAGAGCCACTTCTTGGCCAGATCTTCTTGCCAAAGTTTTTAAGATT  
GATGTACGGGGAGATATCGACACAACCCATCCTACTCGTTTTTGTACAATTGTTGGAAA  
GTGATTCAAAGAAAAGTCAGCAATGCCCCCATGAAGCACATCTTCTAGGGAAAGACCCA  
GTGGAGTGGCGGTCTCATTCAACAAGCTGTGACGTTTGTGTCACTTCCTTTCGTGGAGTC  
AAGAGAAAGAAACCCATGATGAATTCACAGCTGAGCAAAAACTCAGGATTATTGCTGGA

CGTACGAGAAAAATAAGATGCATAAGAAAGGTAAAGCAGCTGAAAAACAAAAGTTTAATG  
AAAAAGATTTCAAACGTAAAGCAAATCCATCTCAGTACAAAATCCCTTGCAATAGATTAT  
CCTGTGGACTTTGTAAAGTCAATATCTTGCCAGATCTGTGAACACATCCTGTCCGATCCA  
GTAGAAACAACATGTAAACACTTATTCTGTAGAGTCTGCATTCTTAAATGCCTTAAAGTA  
ATGGGAAGCTATTGCCATCCTGCCAATATCCTTGCTTTCCTACTGATCTAGTGAGTCCT  
GTAAAATCCTTCTAAACATCCTCAACAATTTGGTTTTGAGATGCCCAATAAAAGGCTGT  
CATGAGGATGTCTTTTTGGAAAAATACTGCCAACATCGTTCTAATCATAAAGAGGCGGAA  
AGC

>MZ712317\_ZMMUR13709\_[Pareas\_formosensis]

GACAGCCACCAGGCTAACTCTGCGAAAGAAAATCCAGCAGGTTCTATGGACGTCCTGAT  
GAACAACCTAAGGCAGCAGCTGTAATGTCACAAGCGCCCTTTGAAACAGGCACTGTGTTG  
AATAAAAATAGCTTGGCAAGAGAGAAAGATGTCTTTCACATGAGCCGAAGGGAGGTGGAA  
GCTCACCAAGCAAATCTGCAGTGCCTCTGTGCGATCTGTGGAGGCTCCCTGAAAACCTGAT  
CCTTGCAAAAAGTGTCATCCAGTTCATGGACCAAGTGGACGCGGAGACCCAGGCTCTTTTG  
AGAAAGAAAGAAAAAGAGCCACTTCTTGGCCAGATCTTCTTGCCAAAGTTTTTAAGATT  
GATGTACGGGGAGATATCGACACAACCCATCCTACTCGTTTTTGTACAATTGTTGGAAA  
GTGATTCAAAGAAAAGTCAGCAATGCCCCCATGAAGCACATCTTCTAGGGAAAGACCCA  
GTGGAGTGGCGGTCTCATTCAACAAGCTGTGACGTTTGTGTCACTTCCTTTCGTGGAGTC  
AAGAGAAAGAAACCCATGATGAATTCACAGCTGAGCAAAAAACTCAGGATTATTGCTGGA  
CGTACGAGAAAAATAAGATGCATAAGAAAGGTAAAGCAGCTGAAAAACAAAAGTTTAATG  
AAAAAGATTTCAAACGTAAAGCAAATCCATCTCAGTACAAAATCCCTTGCAATAGATTAT  
CCTGTGGACTTTGTAAAGTCAATATCTTGCCAGATCTGTGAACACATCCTGTCCGATCCA  
GTAGAAACAACATGTAAACACTTATTCTGTAGAGTCTGCATTCTTAAATGCCTTAAAGTA  
ATGGGAAGCTATTGCCATCCTGCCAATATCCTTGCTTTCCTACTGATCTAGTGAGTCCT  
GTAAAATCCTTCTAAACATCCTCAACAATTTGGTTTTGAGATGCCCAATAAAAGGCTGT  
CATGAGGATGTCTTTTTGGAAAAATACTGCCAACATCGTTCTAATCATAAAGAGGCGGAA  
AGC

>MZ712318\_ZMMUR16333\_[Pareas\_formosensis]

GACAGCCACCAGGCTAACTCTGCGAAAGAAAATCCAGCAGGTTCTATGGACGTCCTGAT

GAACAACCTAAGGCAGCAGCTGTAATGTCACAAGCGCCCTTTGAAACAGGCACTGAGTTG  
AATAAAAATAGCTTGGCAAGAGAGAAAAGATGTCTTTCACATGAGCCGAAGGGAGGTGGAA  
GCTCACCAAGCAAATCTGCAGTGCCTCTGTGCGCATCTGTGGAGGCTCCCTGAAAAGTATGAT  
CCTTGCAAAAAGTGTCCAGTTCATGGACCAAGTGGACGCGGAGACCCAGGCTCTTTTG  
AGAAAGAAAGAAAAAGAGCCACTTCTTGGCCAGATCTTCTTGCCAAAGTTTTTAAGATT  
GATGTACGGGGAGATATCGACACAACCCATCCTACTCGTTTTTGTACAATTGTTGGAAA  
GTGATTCAAAGAAAAGTCAGCAATGCCCCCATGAAGCACATCTTCTAGGGAAAGACCCA  
GTGGAGTGGCGGTCTCATTCAACAAGCTGTGACGTTTGTGTCACCTCCTTCGTGGAGTC  
AAGAGAAAGAAAACCCATGATGAATTCACAGCTGAGCAAAAACTCAGGATTATTGCTGGA  
CGTACGAGAAAAATAAGATGCATAAGAAAGGTAAAGCAGCTGAAAAACAAAAGTTTAATG  
AAAAAGATTTCAAAGTAAAGCAATCCATCTCAGTACAAAATCCCTTGCAATAGATTAT  
CCTGTGGACTTTGTAAAGTCAATATCTTGCCAGATCTGTGAACACATCCTGTCCGATCCA  
GTAGAAACAACATGTAAACACTTATTCTGTAGAGTCTGCATTCTTAAATGCCTTAAAGTA  
ATGGGAAGCTATTGCCATCCTGCCAATATCCTTGCTTTCCTACTGATCTAGTGAGTCCT  
GTAAAATCCTCCTAAACATCCTCAACAATTTGGTTTTGAGATGCCCAATAAAAGGCTGT  
CATGAGGATGTCTTTTTGGAAAAATACTGCCAACATCGTTCTAATCATAAAGAGGCGGAA  
AGC

>MZ712319\_AUP01573\_[Pareas\_berdmorei\_berdmorei]

GACAGCCACCAGGCTAACTCTGCTAAAGAAAATGCAACAGGTTCTATGGACATCACTGAT  
GAACAACCTGAGGCAGCAGCTGTAATGTCACAAGTGCCTTTGAAACAGGCACTGAGTTG  
AATAAAAATAGCTTGGCAAGAGAGAAAAGATGTCTTTCACATGAGCCAAAGGGAGGTGGAA  
GCTCATCAAGCAAACCTGCAGTGTCTCTGTGCGCATCTGTGGAGGCTCACTGAAAAGTATGAT  
CCTTGCAAAAAGTGTCCAGTTCATGGACCAAGTGGATGAGGAGACCCAGGCTCTTTTG  
AGAAAGAAAGAAAAAGAGCCACTTCTTGGCCAGATCTTCTTGCCAAAGTTTTTAAGATT  
GATGTACGGGGAGATATTGACACAACCCATCCCACTCGTTTTTGTACAATTGTTGGAAA  
GTGATTCAAAGAAAAGTCAGCAATGCCCCCATGAAGCACATCTTCTAGGGAAAGACCCA  
GTGGAATGGCGGTCCCATTCAACGAGCTGTGATGTTTGTGTCACCTCCTTCGTGGAGTC  
AAGAGAAAAAAACCAATGTTGAATTCACAGCTGAGCAAAAACTCAGGATTATTGCTGGA  
CGTACGAGAAAAATAACATGCATAAGAAAGGTAAAGCAACTGAAAAATAAAAGTTTAATG



AAAAAGATTTCAAACGTAAAGCAAATCCATCTCAGTACAAAATCCCTTGCAATAGATTAT  
CCTGTGGACTTTGTAAAGTCAATATCTTGCCAGATCTGTGAACACATCCTGTCCGATCCA  
GTAGAAACAACATGTAAGCACTTATTCTGTAGAGTCTGCATTCTTAAATGCCTTAAAGTA  
ATGGGCAGCTATTGCCATCCTGCCGATATCCTTGCTTTCCTACTGATCTAGTGAGTCCT  
GTAAAATCCTTCCTAAACATCCTCAACAATTTGGTTTTGAGATGCCCAATAAAAGGCTGT  
CATGAGGATGTCTTTTTGGAAAATACTGCCAACATCGTTCTAATCATAAAGAGGCAGAA  
AGC

>MZ712320\_CAS240362\_[Pareas\_berdmorei\_berdmorei]

GACAGCCACCAGGCTAACTCTGCTAAAGAAAATGCAACAGGTTCTATGGACATCACTGAT  
GAACAACCTGAGGCAGCAGCTGTAATGTCACAAGTGCCCTTTGAAACAGGCACTGAGTTG  
AATAAAAATAGCTTGGAAGAGAGAAAGATGTCTTTCACATGAGCCAAAGGGAGGTGGAA  
GCTCATCAAGCAAACCTGCAGTGTCTCTGTGCATCTGTGGAGGCTCACTGAAAACCTGAT  
CCTTGCAAAAAGTGTATCCAGTTCATGGACCAGTGGATGAGGAGACCCAGGCTCTTTTG  
AGAAAGAAAGAAAAAGAGCCACTTCTTGCCAGATCTTCTTGCCAAAGTTTTTAAGATT  
GATGTACGGGGAGATATTGACACAACCCATCCCACTCGTTTTTGTACAATTGTTGGAAA  
GTGATTCAAAGAAAAGTCAGCAATGCCCCCATGAAGCACATCTTCTAGGGAAAGACCCA  
GTGGAATGGCGGTCCATTCAACGAGCTGTGATGTTTGTGTCACTTCCTTTCGTGGAGTC  
AAGAGAAAAAAACCAATGTTGAATTCACAGCTGAGCAAAAAACTCAGGATTATTGCTGGA  
CGTACGAGAAAAATAACATGCATAAGAAAGGTAAAGCAACTGAAAAATAAAAGTTTAATG  
AAAAAGATTTCAAACGTAAAGCAAATCCATCTCAGTACAAAATCCCTTGCAATAGATTAT  
CCTGTGGACTTTGTAAAGTCAATATCTTGCCAGATCTGTGAACACATCCTGTCCGATCCA  
GTAGAAACAACATGTAAGCACTTATTCTGTAGAGTCTGCATTCTTAAATGCCTTAAAGTA  
ATGGGCAGCTATTGCCATCCTGCCGATATCCTTGCTTTCCTACTGATCTAGTGAGTCCT  
GTAAAATCCTTCCTAAACATCCTCAACAATTTGGTTTTGAGATGCCCAATAAAAGGCTGT  
CATGAGGATGTCTTTTTGGAAAATACTGCCAACATCGTTCTAATCATAAAGAGGCAGAA  
AGC

>MZ712321\_ZMMUR16803\_[Pareas\_berdmorei\_berdmorei]

GACAGCCACCAGGCTAACTCTGCTAAAGAAAATGCAACAGGTTCTATGGACATCACTGAT  
GAACAACCTGAGGCAGCAGCTGTAATGTCACAAGTGCCCTTTGAAACAGGCACTGAGTTG

AATAAAAATAGCTTGGCAAGAGAGAAAAGATGTCTTTCACATGAGCCAAAGGGAGGTGGAA  
GCTCATCAAGCAAACCTGCAGTGTCTGTGCGCATCTGTGGAGGCTCACTGAAAAGTATG  
CCTTGCAAAAAGTGTATCCAGTTCATGGACCAGTGGATGAGGAGACCCAGGCTCTTTTG  
AGAAAGAAAGAAAAAGAGCCACTTCTGGCCAGATCTTCTTGCCAAAGTTTTTAAGATT  
GATGTACGGGGAGATATTGACACAACCCATCCCACTCGTTTTTGTACAATTGTTGGAAA  
GTGATTCAAAGAAAAGTCAGCAATGCCCCCATGAAGCACATCTTCTAGGGAAAGACCCA  
GTGGAATGGCGGTCCCATTCAACGAGCTGTGATGTTTGTGCTACTTCCTTTCGTGGAGTC  
AAGAGAAAAAAACCAATGTTGAATTCACAGCTGAGCAAAAAACTCAGGATTATTGCTGGA  
CGTACGAGAAAAATAACATGCATAAGAAAGGTAAAGCAACTGAAAAATAAAAGTTTAATG  
AAAAAGATTTCAAAGTAAAGCAATCCATCTCAGTACAAAATCCCTTGCAATAGATTAT  
CCTGTGGACTTTGTAAAGTCAATATCTTGCCAGATCTGTGAACACATCCTGTCCGATCCA  
GTAGAAACAACATGTAAGCACTTATTCTGTAGAGTCTGCATTCTTAAATGCCTTAAAGTA  
ATGGGCAGCTATTGCCATCCTGCCGATATCCTTGCTTTCCTACTGATCTAGTGAGTCCT  
GTAAAATCCTTCTAAACATCCTCAACAATTTGGTTTTGAGATGCCCAATAAAAGGCTGT  
CATGAGGATGTCTTTTTGGAAAAATACTGCCAACATCGTTCTAATCATAAAGAGGCAGAA  
AGC

>MZ712322\_ZMMUR14796\_[Pareas\_berdmorei\_truongsonicus]

GACAGCCACCAGGCTAACTCTGCTAAAGAAAATGCAACAGGTTCTATGGACGTCCTGAT  
GAACAACCTGAGGCAGCAGCTGTAATGTCACAAATGTCCTTTGAAACAGGCACTGAGTTG  
AATAAAAATAGCTTGGCAAGAGAGAAAAGATGTCTTTCACATGAGCCAAAGGGAGGTGGAA  
GCTCACCAAGCAAACCTGCAATGCCTCTGTGCGCATCTGTGGAGGCTCATTGAAAAGTATG  
CCTTGCAAAAAGTGTATCCAGTTCATGGACCAGTGGATGAGGAGACCCAGGCTCTTTTG  
AGAAAGAAAGAAAAAGAGCCACTTCTGGCCAGATCTTCTTGCCAAAGTTTTTAAGATT  
GATGTACGGGGAGATATTGACACAACCCATCCCACTCGTTTTTGTACAATTGTTGGAAA  
GTGATTCAAAGAAAAGTCAGCAATGCCCCCATGAAGCACATCTTCTAGGGAAAGACCCA  
GTGGAATGGCAGTCCCATTCAACGAGCTGTGATGTTTGTGCTACTTCCTTTCGTGGAGTC  
AAGAGAAAAAAACCAATGCTGAATTCACAGCTGAGAAAAAAACTCAGGATTATTGCTGGA  
CGTACGAGAAAAATAACATGCATAAGAAAGGTAAAGCAACTGAAAAATAAAAGTTTAATG  
AAAAAGATTTCAAAGTAAAGCAATCCATCTCAGTACAAAATCCCTTGCAATAGATTAT

CCTGTGGACTTTGTAAAGTCAATATCTTGCCAGATCTGTGAACACATCCTGTCCGATCCA  
GTAGAAACAACATGTAAGCACTTATTCTGTAGAGTCTGCATTCTTAAATGCCTTAAAGTA  
ATGGGCAGCTATTGCCATCCTGCCGATATCCTTGCTTCCTACTGATCTAGTGAGTCCT  
GTAAAATCCTTCCTAAACATCCTCAACAATTTGGTTTTGAGATGCCCAATAAAAGGCTGT  
CATGAGGATGTCTTTTTGGAAAATACTGCCAACATCGTTCTAATCATAAAGAGGCAGAA  
AGC

>MZ712323\_ZMMUR16801\_[Pareas\_berdmorei\_truongsonicus]

GACAGCCACCAGGCTAACTCTGCTAAAGAAAATGCAACAGGTTCTATGGACGTCCTGAT  
GAACAACCTGAGGCAGCAGCTGTAATGTCACAAATGTCCTTTGAAACAGGCACTGAGTTG  
AATAAAAATAGCTTGCCAAGAGAGAAAAGATGTCTTTCACATGAGCCAAAGGGAGGTGGAA  
GCTCACCAAGCAAACCTGCAATGCCTCTGTCGCATCTGTGGAGGCTCATTGAAAAGTGT  
CCTTGCAAAAAGTGCATCCAGTTCATGGACCAGTGGATGAGGAGACCCAGGCTCTTTTG  
AGAAAGAAAGAAAAAGAGCCACTTCTTGCCAGATCTTCTTGCCAAAGTTTTAAGATT  
GATGTACGGGGAGATATTGACACAACCCATCCCACTCGTTTTTGTACAATTGTTGGAAA  
GTGATTCAAAGAAAAGTCAGCAATGCCCCCATGAAGCACATCTTCTAGGGAAAGACCCA  
GTGGAATGGCAGTCCATTCAACGAGCTGTGATGTTTGTGTCCTTCCTTCGTGGAGTC  
AAGAGAAAAAAACCAATGCTGAATTCACAGCTGAGAAAAAACTCAGGATTATTGCTGGA  
CGTACGAGAAAAATAACATGCATAAGAAAGGTAAGCAACTGAAAAATAAAAGTTTAATG  
AAAAAGATTTCAAACCTGTAAGCAAATCCATCTCAGTACAAAATCCCTTGCAATAGATTAT  
CCTGTGGACTTTGTAAAGTCAATATCTTGCCAGATCTGTGAACACATCCTGTCCGATCCA  
GTAGAAACAACATGTAAGCACTTATTCTGTAGAGTCTGCATTCTTAAATGCCTTAAAGTA  
ATGGGCAGCTATTGCCATCCTGCCGATATCCTTGCTTCCTACTGATCTAGTGAGTCCT  
GTAAAATCCTTCCTAAACATCCTCAACAATTTGGTTTTGAGATGCCCAATAAAAGGCTGT  
CATGAGGATGTCTTTTTGGAAAATACTGCCAACATCGTTCTAATCATAAAGAGGCAGAA  
AGC

>MZ712324\_ZMMUR137531\_[Pareas\_berdmorei\_unicolor]

GACAGCCACCAGGCTAACTCTGCTAAAGAAAATGCAACAGGTTCTATGGACATCACTGAT  
GAACAACCTGAGGCAGCAGCTGTAATGTCACAAGTGCCTTTGAAACAGGCACTGAGTTG  
AATAAAAATAGCTTGCCAAGAGAGAAAAGATGTCTTTCACATGAGCCAAAGGGAGGTGGAA

GCTCACCAAGCAAACCTGCAATGCCTCTGTGCGCATCTGTGGAGGCTCACTGAAAAGTAT  
CCTTGCAAAAAGTGCATCCAGTTCATGGACCAGTGGATGAGGAGACCCAGGCTCTTTTG  
AGAAAGAAAGAAAAAGAGCCACTTCTTGGCCAGATCTTCTTGCCAAAGTTTTTAAGATT  
GATGTACGGGGAGATATTGACACAACCCATCCCACTCGTTTTTGTACAATTGTTGGAAA  
GTGATTCAAAGAAAAGTCAGCAATGCCCCCATGAAGCACATCTTCTAGGGAAAGACCCA  
GTGGAATGGCAGTCCCATTCAACGAGCTGTGATGTTTGTGTCACCTTCCTTCGTGGAGTC  
AAGAGAAAAAAACCAATGCTGAATTCACAGCTGAGCAAAAAACTCAGGATTATTGCTGGA  
CGTACGAGAAAAATAACATGCATAAGAAAGGTAAAGCAACTGAAAAATAAAAGTTTAATG  
AAAAAGATTTCAAAGTGAAGCAAATCCATCTCAGTACAAAATCCCTTGCAATAGATTAT  
CCTGTGGACTTTGTAAAGTCAATATCTTGCCAGATCTGTGAACACATCCTGTCCGATCCA  
GTAGAAACAACATGTAAGCACTTATTCTGTAGAGTCTGCATTCTTAAATGCCTTAAAGTA  
ATGGGCAGCTATTGCCATCCTGCCGATATCCTTGCTTTCCTACTGATCTAGTGAGTCCT  
GTAAAATCCTTCCTAAACATCCTCAACAATTTGGTTTTGAGATGCCCAATAAAAGGCTGT  
CATGAGGATGTCTTTTTGGAAAAATACTGCCAACATCGTTCTAATCATAAAGAGGCAGAA  
AGC

>MZ712325\_ZMMUR137532\_[Pareas\_berdmorei\_unicolor]

GACAGCCACCAGGCTAACTCTGCTAAAGAAAATGCAACAGGTTCTATGGACATCACTGAT  
GAACAACCTGAGGCAGCAGCTGTAATGTCACAAGTGCCTTTGAAACAGGCACTGAGTTG  
AATAAAAATAGCTTGGCAAGAGAGAAAGATGTCTTTCACATGAGCCAAAGGGAGGTGGAA  
GCTCACCAAGCAAACCTGCAATGCCTCTGTGCGCATCTGTGGAGGCTCACTGAAAAGTAT  
CCTTGCAAAAAGTGCATCCAGTTCATGGACCAGTGGATGAGGAGACCCAGGCTCTTTTG  
AGAAAGAAAGAAAAAGAGCCACTTCTTGGCCAGATCTTCTTGCCAAAGTTTTTAAGATT  
GATGTACGGGGAGATATTGACACAACCCATCCCACTCGTTTTTGTACAATTGTTGGAAA  
GTGATTCAAAGAAAAGTCAGCAATGCCCCCATGAAGCACATCTTCTAGGGAAAGACCCA  
GTGGAATGGCAGTCCCATTCAACGAGCTGTGATGTTTGTGTCACCTTCCTTCGTGGAGTC  
AAGAGAAAAAAACCAATGCTGAATTCACAGCTGAGCAAAAAACTCAGGATTATTGCTGGA  
CGTACGAGAAAAATAACATGCATAAGAAAGGTAAAGCAACTGAAAAATAAAAGTTTAATG  
AAAAAGATTTCAAAGTGAAGCAAATCCATCTCAGTACAAAATCCCTTGCAATAGATTAT  
CCTGTGGACTTTGTAAAGTCAATATCTTGCCAGATCTGTGAACACATCCTGTCCGATCCA

GTAGAAACAACATGTAAGCACTTATTCTGTAGAGTCTGCATTCTTAAATGCCTTAAAGTA  
ATGGGCAGCTATTGCCATCCTGCCGATATCCTTGCTTCCTACTGATCTAGTGAGTCCT  
GTAAAATCCTTCCTAAACATCCTCAACAATTTGGTTTTGAGATGCCCAATAAAAGGCTGT  
CATGAGGATGTCTTTTTGGAAAATACTGCCAACATCGTTCTAATCATAAAGAGGCAGAA  
AGC

>MZ712326\_ZMMUR14013\_[Pareas\_berdmorei\_unicolor]

GACAGCCACCAGGCTAACTCTGCTAAAGAAAATGCAACAGGTTCTATGGACATCACTGAT  
GAACAACCTGAGGCAGCAGCTGTAATGTCACAAGTGCCTTTGAAACAGGCACTGAGTTG  
AATAAAAATAGCTTGGAAGAGAGAAAAGATGTCTTTCACATGAGCCAAAGGGAGGTGGAA  
GCTCACCAAGCAAACCTGCAATGCCTCTGTGCGATCTGTGGAGGCTCACTGAAAAGTATGAT  
CCTTGCAAAAAGTGCATCCAGTTCATGGACCAGTGGATGAGGAGACCCAGGCTCTTTTG  
AGAAAGAAAGAAAAAAGAGCCACTTCTTGCCAGATCTTCTTGCCAAAGTTTTTAAGATT  
GATGTACGGGGAGATATTGACACAACCCATCCCACTCGTTTTTGTCACAATTGTTGGAAA  
GTGATTCAAAGAAAAGTCAGCAATGCCCCCATGAAGCACATCTTCTAGGGAAAGACCCA  
GTGGAATGGCAGTCCCATTCAACGAGCTGTGATGTTTGTGCTACTTCCTTCGTGGAGTC  
AAGAGAAAAAACAATGCTGAATTCACAGCTGAGCAAAAAACTCAGGATTATTGCTGGA  
CGTACGAGAAAAATAACATGCATAAGAAAGGTAAAGCAACTGAAAAATAAAAGTTTAATG  
AAAAAGATTTCAAAGTGAAGCAAATCCATCTCAGTACAAAATCCCTTGCAATAGATTAT  
CCTGTGGACTTTGTAAAGTCAATATCTTGCCAGATCTGTGAACACATCCTGTCCGATCCA  
GTAGAAACAACATGTAAGCACTTATTCTGTAGAGTCTGCATTCTTAAATGCCTTAAAGTA  
ATGGGCAGCTATTGCCATCCTGCCGATATCCTTGCTTCCTACTGATCTAGTGAGTCCT  
GTAAAATCCTTCCTAAACATCCTCAACAATTTGGTTTTGAGATGCCCAATAAAAGGCTGT  
CATGAGGATGTCTTTTTGGAAAATACTGCCAACATCGTTCTAATCATAAAGAGGCAGAA  
AGC

>MZ712327\_ZMMUR14263\_[Pareas\_berdmorei\_unicolor]

GACAGCCACCAGGCTAACTCTGCTAAAGAAAATGCAACAGGTTCTATGGACATCACTGAT  
GAACAACCTGAGGCAGCAGCTGTAATGTCACAAGTGCCTTTGAAACAGGCACTGAGTTG  
AATAAAAATAGCTTGGAAGAGAGAAAAGATGTCTTTCACATGAGCCAAAGGGAGGTGGAA  
GCTCACCTAGCAAACCTGCAATGCCTCTGTGCGATCTGTGGAGGCTCACTGAAAAGTATGAT

CCTTGCAAAAAGTGCATCCAGTTCATGGACCACTGGATGAGGAGACCCAGGCTCTTTTG  
AGAAAGAAAGAAAAAGAGCCACTTCTTGCCAGATCTTCTTGCCAAAGTTTTTAAGATT  
GATGTACGGGGAGATATTGACACAACCCATCCCACTCGTTTTTGTACAATTGTTGGAAA  
GTGATTCAAAGAAAAGTCAGCAATGCCCCCATGAAGCACATCTTCTAGGGAAAGACCCA  
GTGGAATGGCAGTCCCATTCAACGAGCTGTGATGTTTGTGCTACTTCCTTTTCGTGGAGTC  
AAGAGAAAAAAACCAATGCTGAATTCACAGCTGAGCAAAAAACTCAGGATTATTGCTGGA  
CGTACGAGAAAAATAACATGCATAAGAAAGGTAAAGCAACTGAAAAATAAAAGTTTAATG  
AAAAAGATTTCAAAGTGAAGCAAATCCATCTCAGTACAAAATCCCTTGCGATAGATTAT  
CCTGTGGACTTTGTAAAGTCAATATCTTGCCAGATCTGTGAACACATCCTGTCCGATCCA  
GTAGAAACAACATGTAAGCACTTATTCTGTAGAGTCTGCATTCTTAAATGCCTTAAAGTA  
ATGGGCAGCTATTGCCATCCTGCCGATATCCTTGCTTCCTACTGATCTAGTGAGTCCT  
GTAAAATCCTTCCTAACATCCTCAACAATTTGGTTTTGAGATGCCCAATAAAAGGCTGT  
CATGAGGATGTCTTTTTGGAAAAATACTGCCAACATCGTTCTAATCATAAAGAGGCAGAA  
AGC

>MZ712328\_ZMMUR14421\_[Pareas\_berdmorei\_unicolor]

GACAGCCACCAGGCTAACTCTGCTAAAGAAAATGCAACAGGTTCTATGGACATCACTGAT  
GAACAACCTGAGGCAGCAGCTGTAATGTCACAAGTGCCTTTGAAACAGGCACTGAGTTG  
AATAAAAATAGCTTGGAAGAGAGAAAGATGTCTTTCACATGAGCCAAAGGGAGGTGGAA  
GCTCACCAAGCAAACCTGCAATGCCTCTGTGCATCTGTGGAGGCTCACTGAAAAGTATGAT  
CCTTGCAAAAAGTGCATCCAGTTCATGGACCACTGGATGAGGAGACCCAGGCTCTTTTG  
AGAAAGAAAGAAAAAGAGCCACTTCTTGCCAGATCTTCTTGCCAAAGTTTTTAAGATT  
GATGTACGGGGAGATATTGACACAACCCATCCCACTCGTTTTTGTACAATTGTTGGAAA  
GTGATTCAAAGAAAAGTCAGCAATGCCCCCATGAAGCACATCTTCTAGGGAAAGACCCA  
GTGGAATGGCAGTCCCATTCAACGAGCTGTGATGTTTGTGCTACTTCCTTTTCGTGGAGTC  
AAGAGAAAAAAACCAATGCTGAATTCACAGCTGAGCAAAAAACTCAGGATTATTGCTGGA  
CGTACGAGAAAAATAACATGCATAAGAAAGGTAAAGCAACTGAAAAATAAAAGTTTAATG  
AAAAAGATTTCAAAGTGAAGCAAATCCATCTCAGTACAAAATCCCTTGCGATAGATTAT  
CCTGTGGACTTTGTAAAGTCAATATCTTGCCAGATCTGTGAACACATCCTGTCCGATCCA  
GTAGAAACAACATGTAAGCACTTATTCTGTAGAGTCTGCATTCTTAAATGCCTTAAAGTA

ATGGGCAGCTATTGCCATCCTGCCAATATCCTTGCTTCCTACTGATCTAGTGAGTCCT  
GTAAAATCCTTCCTAAACATCCTCAACAATTTGGTTTTGAGATGCCCAATAAAAGGCTGT  
CATGAGGATGTCTTTTTGGAAAATACTGCCAACATCGTTCTAATCATAAAGAGGCAGAA  
AGC

>MZ712329\_SIEZC20216\_[Pareas\_berdmorei\_unicolor]

GACAGCCACCAGGCTAACTCTGCTAAAGAAAATGCAACAGGTTCTATGGACATCACTGAT  
GAACAACCTGAGGCAGCAGCTGTAATGTCACAAGTGCCTTTGAAACAGGCACTGAGTTG  
AATAAAAATAGCTTGGAAGAGAGAAAGATGTCTTTCACATGAGCCAAAGGGAGGTGGAA  
GCTCACCAAGCAAACCTGCAATGCCTCTGTCGCATCTGTGGAGGCTCACTGAAAAGTATGAT  
CCTTGCAAAAAGTGCATCCAGTTCATGGACCAGTGGATGAGGAGACCCAGGCTCTTTTG  
AGAAAGAAAGAAAAAAGAGCCACTTCTTGCCAGATCTTCTTGCCAAAGTTTTTAAGATT  
GATGTACGGGGAGATATTGACACAACCCATCCCACTCGTTTTTGTACAATTGTTGGAAA  
GTGATTCAAAGAAAAGTCAGCAATGCCCCCATGAAGCACATCTTCTAGGGAAAGACCCA  
GTGGAATGGCAGTCCATTCAACGAGCTGTGATGTTTGTGTCACCTTCCTTCGTGGAGTC  
AAGAGAAAAAACCAATGCTGAATTCACAGCTGAGCAAAAAACTCAGGATTATTGCTGGA  
CGTACGAGAAAAATAACATGCATAAGAAAGGTAAAGCAACTGAAAAATAAAGTTTAATG  
AAAAAGATTTCAAAGTGAAGCAAATCCATCTCAGTACAAAATCCCTTGCGATAGATTAT  
CCTGTGGACTTTGTAAAGTCAATATCTTGCCAGATCTGTGAACACATCCTGTCCGATCCA  
GTAGAAACAACATGTAAGCACTTATTCTGTAGAGTCTGCATTCTTAAATGCCTTAAAGTA  
ATGGGCAGCTATTGCCATCCTGCCAATATCCTTGCTTCCTACTGATCTAGTGAGTCCT  
GTAAAATCCTTCCTAAACATCCTCAACAATTTGGTTTTGAGATGCCCAATAAAAGGCTGT  
CATGAGGATGTCTTTTTGGAAAATACTGCCAACATCGTTCTAATCATAAAGAGGCAGAA  
AGC

>MZ712330\_ZMMUR136791\_[Pareas\_berdmorei\_unicolor]

GACAGCCACCAGGCTAACTCTGCTAAAGAAAATGCAACAGGTTCTATGGACATCACTGAT  
GAACAACCTGAGGCAGCAGCTGTAATGTCACAAGTGCCTTTGAAACAGGCACTGAGTTG  
AATAAAAATAGCTTGGAAGAGAGAAAGATGTCTTTCACATGAGCCAAAGGGAGGTGGAA  
GCTCACCAAGCAAACCTGCAATGCCTCTGTCGCATCTGTGGAGGCTCACTGAAAAGTATGAT  
CCTTGCAAAAAGTGCATCCAGTTCATGGACCAGTGGATGAGGAGACCCAGGCTCTTTTG

AGAAAGAAAGAAAAAGAGCCACTTCTTGGCCAGATCTTCTTGCCAAAGTTTTTAAGATT  
GATGTACGGGGAGATATTGACACAACCCATCCCACTCGTTTTTGTACAATTGTTGGAAA  
GTGATTCAAAGAAAAGTCAGCAATGCCCCCATGAAGCACATCTTCTAGGGAAAGACCCA  
GTGGAATGGCAGTCCCATTCAACGAGCTGTGATGTTTGTGTCACCTTCCTTCGTGGAGTC  
AAGAGAAAAAAACCAATGCTGAATTCACAGCTGAGCAAAAAACTCAGGATTATTGCTGGA  
CGTACGAGAAAAATAACATGCATAAGAAAGGTAAAGCAACTGAAAAATAAAAGTTTAATG  
AAAAAGATTTCAAAGTAAAGCAATCCATCTCAGTACAAAATCCCTTGCAATAGATTAT  
CCTGTGGACTTTGTAAAGTCAATATCTTGCCAGATCTGTGAACACATCCTGTCCGATCCA  
GTAGAAACAACATGTAAGCACTTATTCTGTAGAGTCTGCATTCTTAAATGCCTTAAAGTA  
ATGGGCAGCTATTGCCATCCTGCCGATATCCTTGCTTCCTACTGATCTAGTGAGTCCT  
GTAAAATCCTCCTAAACATCCTCAACAATTTGGTTTTGAGATGCCCAATAAAAGGCTGT  
CATGAGGATGTCTTTTTGGAAAAATACTGCCAACATCGTTCTAATCATAAAGAGGCAGAA  
AGC

>MZ712331\_ZMMUR136792\_[Pareas\_berdmorei\_unicolor]

GACAGCCACCAGGCTAACTCTGCTAAAGAAAATGCAACAGGTTCTATGGACATCACTGAT  
GAACAACCTGAGGCAGCAGCTGTAATGTCACAAGTGCCTTTGAAACAGGCACTGAGTTG  
AATAAAAATAGCTTGGAAGAGAGAAAAGATGTCTTTCACATGAGCCAAAGGGAGGTGGAA  
GCTCACCAAGCAAACCTGCAATGCCTCTGTGCATCTGTGGAGGCTCACTGAAAAGTATGAT  
CCTTGCAAAAAGTGCATCCAGTTCATGGACCAGTGGATGAGGAGACCCAGGCTCTTTTG  
AGAAAGAAAGAAAAAGAGCCACTTCTTGGCCAGATCTTCTTGCCAAAGTTTTTAAGATT  
GATGTACGGGGAGATATTGACACAACCCATCCCACTCGTTTTTGTACAATTGTTGGAAA  
GTGATTCAAAGAAAAGTCAGCAATGCCCCCATGAAGCACATCTTCTAGGGAAAGACCCA  
GTGGAATGGCAGTCCCATTCAACGAGCTGTGATGTTTGTGTCACCTTCCTTCGTGGAGTC  
AAGAGAAAAAAACCAATGCTGAATTCACAGCTGAGCAAAAAACTCAGGATTATTGCTGGA  
CGTACGAGAAAAATAACATGCATAAGAAAGGTAAAGCAACTGAAAAATAAAAGTTTAATG  
AAAAAGATTTCAAAGTAAAGCAATCCATCTCAGTACAAAATCCCTTGCAATAGATTAT  
CCTGTGGACTTTGTAAAGTCAATATCTTGCCAGATCTGTGAACACATCCTGTCCGATCCA  
GTAGAAACAACATGTAAGCACTTATTCTGTAGAGTCTGCATTCTTAAATGCCTTAAAGTA  
ATGGGCAGCTATTGCCATCCTGCCGATATCCTTGCTTCCTACTGATCTAGTGAGTCCT



GTAAAATCCTTCCTAAACATCCTCAACAATTTGGTTTTGAGATGCCCAATAAAAGGCTGT  
CATGAGGATGTCTTTTTGGAAAATACTGCCAACATCGTTCTAATCATAAAGAGGCAGAA  
AGC

>MZ712332\_ZMMUR14165\_[Pareas\_berdmorei\_unicolor]

GACAGCCACCAGGCTAACTCTGCTAAAGAAAATGCAACAGGTTCTATGGACATCACTGAT  
GAACAACCTGAGGCAGCAGCTGTAATGTCACAAGTGCCTTTGAAACAGGCACTGAGTTG  
AATAAAAATAGCTTGGAAGAGAGAAAAGATGTCTTTCACATGAGCCAAAGGGAGGTGGAA  
GCTCACCAAGCAAACCTGCAATGCCTCTGTGCATCTGTGGAGGCTCACTGAAAAGTGT  
CCTTGCAAAAAGTGCATCCAGTTCATGGACCAGTGGATGAGGAGACCCAGGCTCTTTTG  
AGAAAGAAAGAAAAAGAGCCACTTCTTGCCAGATCTTCTTGCCAAAGTTTTTAAGATT  
GATGTACGGGGAGATATTGACACAACCCATCCCACTCGTTTTTGTACAATTGTTGGAAA  
GTGATTCAAAGAAAAGTCAGCAATGCCCCCATGAAGCACATCTTCTAGGGAAAGACCCA  
GTGGAATGGCAGTCCATTCAACGAGCTGTGATGTTTGTGTCACCTCCTTTGTTGGAGTC  
AAGAGAAAAAACCAATGCTGAATTCACAGCTGAGCAAAAAACTCAGGATTATTGCTGGA  
CGTACGAGAAAAATAACATGCATAAGAAAGGTAAAGCAACTGAAAAATAAAAGTTTAATG  
AAAAAGATTTCAAAGTGAAGCAAATCCATCTCAGTACAAAATCCCTTGCAATAGATTAT  
CCTGTGGACTTTGTAAAGTCAATATCTTGCCAGATCTGTGAACACATCCTGTCCGATCCA  
GTAGAAACAACATGTAAGCACTTATTCTGTAGAGTCTGCATTCTTAAATGCCTTAAAGTA  
ATGGGCAGCTATTGCCATCCTGCCGATATCCTTGCTTTCCTACTGATCTAGTGAGTCT  
GTAAAATCCTTCCTAAACATCCTCAACAATTTGGTTTTGAGATGCCCAATAAAAGGCTGT  
CATGAGGATGTCTTTTTGGAAAATACTGCCAACATCGTTCTAATCATAAAGAGGCAGAA  
AGC

>MZ712333\_ZMMUR16800\_[Pareas\_carinatus\_tenasserimicus]

GACAGCCACCAGGCTAACTCTGCTAAAGAAAATGCAACAGGTTCTATGGACATCACTGGT  
GAACAACCTGAGGCAGCATCTGTAATGTCACAAGTGCCTTTGAAACAGGCACTGAGTTG  
AATAAAAATAGCTTGGAAGAGAGAAAAGATGTCTTTCACATGAGACAAAGAGAGGTGGAA  
GCTCACCAAGCAAACCTGCAATGCCTCTGTGCATCTGTGGAGGCTCACTGAAAAGTGT  
CCTTGCAAAAAGTGCATCCAGTTCATGGACCAGTGGATGAGGAGACCCAGGCTCTTTTG  
AGAAAGAAAGAAAAAGAGCCACTTCTTGCCAGATCTTCTTGCCAAAGTTTTTAAGATT

GATGTACGGGGAGATATCGACACAACCCATCCCACTCGTTTTGTGACAATTGTTGGAAA  
GTGATTCAAAGAAAAGTCAGCAATGCCCCCATGAAGCACATCTTCTAGGGAAAGACCCA  
GTGGAATGGCGGTCCCATTCAACGAGCTGTGATGTTTGTGTCACCTCCTTCGTGGAGTC  
AAGAGAAAAAAACCAATGCTGAATTCACAGCTGAGCAAAAACTCAGGATTATTGCTGGA  
CATACGAGAAAAATAACATGCATAAGAAAGGTAAAGCAACTGAAAAATAAAAGTTTAATG  
AAAAAGATTTCAAACCTGTAAGCAAATCCATCTCAGTACAAAATCCCTTGCAATAGATTAT  
CCTGTGGACTTTGTAAAGTCAATATCTTGCCAGATCTGTGAACACATCCTGTCCGATCCA  
GTAGAAACAACATGTAAGCACTTATTCTGTAGAGTCTGCATTCTTAAATGCCTTAAAGTA  
ATGGGCAGCTATTGCCATCCTGCCGATATCCTTGCTTCCTACTGATCTAGTGAGTCCT  
GTAAAATCCTTCCTAAACATCCTTAACAATTTGGTTTTGAGATGCCCAATAAAAGGCTGC  
CATGAGGATGTCTTTTTGGAAAAATACTGCCAACATCGTTCTAATCATAAAGAGGCAGAA  
AGC

>MZ712334\_CAS247982\_[Pareas\_carinatus\_tenasserimicus]

GACAGCCACCAGGCTAACTCTGCTAAAGAAAATGCAACAGGTTCTATGGACATCACTGGT  
GAACAACCTGAGGCAGCATCTGTAATGTCACAAGTGCCCTTGAAACAGGCACTGAGTTG  
AATAAAAATAGCTTGGAAGAGAGAAAGATGTCTTTCACATGAGACAAAGAGAGGTGGAA  
GCTCACCAAGCAAACCTGCAATGCCTCTGTGCATCTGTGGAGGCTCACTGAAAACCTGAT  
CCTTGCAAAAAGTGTCATCCAGTTCATGGACCAGTGGATGAGGAGACCCAGGCTCTTTTG  
AGAAAGAAAGAAAAAGAGCCACTTCTTGCCAGATCTTCTTGCCAAAGTTTTTAAGATT  
GATGTACGGGGAGATATCGACACAACCCATCCCACTCGTTTTGTGACAATTGTTGGAAA  
GTGATTCAAAGAAAAGTCAGCAATGCCCCCATGAAGCACATCTTCTAGGGAAAGACCCA  
GTGGAATGGCGGTCCCATTCAACGAGCTGTGATGTTTGTGTCACCTCCTTCGTGGAGTC  
AAGAGAAAAAAACCAATGCTGAATTCACAGCTGAGCAAAAACTCAGGATTATTGCTGGA  
CATACGAGAAAAATAACATGCATAAGAAAGGTAAAGCAACTGAAAAATAAAAGTTTAATG  
AAAAAGATTTCAAACCTGTAAGCAAATCCATCTCAGTACAAAATCCCTTGCAATAGATTAT  
CCTGTGGACTTTGTAAAGTCAATATCTTGCCAGATCTGTGAACACATCCTGTCCGATCCA  
GTAGAAACAACATGTAAGCACTTATTCTGTAGAGTCTGCATTCTTAAATGCCTTAAAGTA  
ATGGGCAGCTATTGCCATCCTGCCGATATCCTTGCTTCCTACTGATCTAGTGAGTCCT  
GTAAAATCCTTCCTAAACATCCTTAACAATTTGGTTTTGAGATGCCCAATAAAAGGCTGC

CATGAGGATGTCTTTTTGGAAAATACTGCCAACATCGTTCTAATCATAAAGAGGCAGAA  
AGC

>MZ712335\_ZMMUR16802\_[Pareas\_kuznetsovorum]

GACAGCCACCAGGCTAACTCTGCTAAAGAAAATGCAACAGATTCTATGGACATCACTGAT  
GAACAACCTAAGGCACCATCTGTAATGTCACAAGTGCCCTTTGAAACAGGCACTGAGTTG  
AATAAAAATAGCTTGGCAAGAGAGAAAAGATGTCTTTCACATGAGCCAAAGGGAGGTGGAA  
GCTCACCAAGCAAACCTGCAGTGTCTCTGTGCATCTGTGGAGGCTCACTGAAAAGTATGAT  
CCTTGCAAAAAGTGCATCCAGTTCATGGACCAAGTGGATGAGGAGACCCAGGCTCTTTTG  
AGAAAGAAAGAAAAAGAGCCACTTCTTGGCCAGATCTTCTTGCCAAAGTGTTTAAGATT  
GATGTACGGGGAGATATTGACACAACCCATCCTACTCGTTTTTGTACAATTGTTGGAAA  
GTGATTCAAAGAAAAGTCAGCAATGCCCCCATGAAGCACATCTTTTAGGGAAAGACCCA  
GTGGAATGGCGGTCCCATTCAACGAGCTGTGATGTTTGTGTCACCTCCTTTTCGTGGAGTC  
AAGAGAAAAAAAACAATGCTGAATTCACAGCTGAGCAAAAAACTCAGGATTATTGCTGGA  
CGTACGAGAAAAATAACATGCATAAGAAAGGTAAAGCAACTAAAAACAAAAGTTTAATG  
AAAAAGATTTCAAAGTCAAGCAAATCCATCTCAGTACAAAATCCCTTGCAATAGATTAT  
CCTGTGGACTTTGTAAAGTCAATATCTTGCCAGATCTGTGAACACATCCTGTCCGATCCA  
GTAGAAACAACATGTAAGCACTTATTCTGTAGAGTCTGCATTCTTAAATGCCTTAAAGTA  
ATGGGCAGCTATTGCCATCCTGCCGATATCCTTGCTTTCCTACTGATCTAGTGAGTCT  
GTAAAATCCTTCTAAACATCCTCAACAATTTGGTTTTGAGATGCCCAATAAAAGGCTGT  
CATGAGGATGTCTTTTTGGAAAATACTGCCAACATCGTTCTAATCATAAAGAGGCAGAA  
AGC

>MZ712336\_LSUHC10604\_[Pareas\_carinatus\_carinatus]

GACAGCCACCAGGCTAACTCTGCTAAAGAAAATGCAACAGGTTCTATGGACATCACTGGT  
GAACAACTTGAGGCAGCATCTGTAATGTCACAAGTGCCCTTTGAAACAGGCACTGAGTTG  
AATAAAAATAGCTTGGCAAGAGAGAAAAGATGTCTTTCACATGAGACAAAGAGAGGTGGAA  
GCTCACCAAGCAAACCTGCAATGCCTCTGTGCATCTGTGGAGGCTCACTGAAAAGTATGAT  
CCTTGCAAAAAGTGCATCCAGTTCATGGACCAAGTGGATGAGGAGACCCAGGCTCTTTTG  
AGAAAGAAAGAAAAAGAGCCACTTCTTGGCCAGATCTTCTTGCCAAAGTTTTTAAGATT  
GATGTACGGGGAGATATCGACACAACCCATCCCACTCGTTTTTGTACAATTGTTGGAAA

GTGATTCAAAGAAAAGTCAGCAATGCCCCCATGAAGCACATCTTCTAGGGAAAGACCCA  
GTGGAATGGCGGTCCCATTCAACGAGCTGTGATGTTTGTGTCACTTCCTTTCGTGGAGTC  
AAGAGAAAAAACCAATGCTGAATTCACAGCTGAGCAAAAACTCAGGATTATTGCTGGA  
CATACGAGAAAAATAACATGCATAAGAAAGGTAAAGCAACTGAAAAATAAAAGTTAATG  
AAAAAGATTTCAAAGTAAAGCAAATCCATCTCAGTACAAAATCCCTTGCAATAGATTAT  
CCTGTGGACTTTGTAAAGTCAATATCTTGCCAGATCTGTGAACACATCCTGTCCGATCCA  
GTAGAAACAACATGTAAGCACTTATTCTGTAGAGTCTGCATTCTTAAATGCCTTAAAGTA  
ATGGGCAGCTATTGCCATCCTGCCGATATCCTTGCTTTCCTACTGATCTAGTGAGTCCT  
GTAAAATCCTTCCTAAACATCCTTAACAATTTGGTTTTGAGATGCCCAATAAAAGGCTGC  
CATGAGGATGTCTTTTTGGAAAAATACTGCCAACATCGTTCTAATCATAAAGAGGCAGAA  
AGC

>MZ712337\_ZMMUR16393\_[Pareas\_abros]

GACAGCCACCAGGCTAACTCTGCTAAAGAAAATGCAACAGGTTCTATGGACATCACTGAT  
GAACAACCTGAGGCAGCAGCTGTAATGTCACAAGTGTCTTTGAAACAGGCACTGAGTTG  
AATAAAAATAGCTTGGCAAGAGAGAAAGATGTCTTTCACATGAGCCAAAGGGAGGTGGAA  
GCTCACCAAGCAAACCTGCAGTGCCTCTGTGCATCTGTGGAGGCTCACTGAAAAGTATGAT  
CCTTGCAAAAAGTGTATCCGGTTCATGGACCAGTGGATGAGGAGACCCAGGCTCTTTTG  
AGAAAGAAAGAAAAAGAGCCACTTCTTGGCCAGATCTTCTTGCCAAAGTTTTTAAGATT  
GATGTACGGGGAGATATTGACACAACCCACCCTACTCGTTTTTGTACAATTGTTGGAAA  
GTGATTCAAAGAAAAGTCAGCAATGCCCCCACGAAGCACATCTTCTAGGGAAAGACCCA  
GTGGAATGGCGGCCCCATTCAATGAGCTGTGACGTTTGTGTCACTTCCTTTCGTGGAGTC  
AAGAGAAAGAAAACCAATGCTGAATTCACAGCTGAGCAAAAACTCAGGATTATTGCTGGA  
CGTACGAGAAAAATAACATGCATAAGAAAGGTAAAGCAACTGAAAAACAAAAGTTAATG  
AAAAAGATTTCAAAGTAAAGCAAATCCATCTCAGTACAAAATCCCTTGCAATAGATTAT  
CCTGTGGACTTTGTAAAGTCAATATCTTGCCAGATCTGTGAACACATCCTGTCCGATCCA  
GTAGAAACAACATGTAAGCACTTATTCTGTAGAGTCTGCATTCTTAAATGCCTTAAAGTA  
ATGGGAAGCTATTGCCATCCTGCCGATATCCTTGCTTTCCTACTGATCTAGTGAGTCCT  
GTAAAATCCTTCCTAAACATCCTCAACAATTTGGTTTTGAGATGCCCAATAAAAGGCTGT  
CATGAGGATGTCTTTTTGGAAAAATACTGCCAACATCGTTCTAATCATAAAGAGGCAGAA

AGC

>MZ712338\_ZMMUR16392\_[Pareas\_abros]

GACAGCCACCAGGCTAACTCTGCTAAAGAAAATGCAACAGGTTCTATGGACATCACTGAT  
GAACAACCTGAGGCAGCAGCTGTAATGTCACAAGTGCCCTTTGAAACAGGCACTGAGTTG  
AATAAAAATAGCTTGGCAAGAGAGAAAGATGTCTTTCACATGAGCCAAAGGGAGGTGGAA  
GCTCACCAAGCAAACCTGCAGTGCCTCTGTGCATCTGTGGAGGCTCACTGAAAAGTATGAT  
CCTTGCAAAAAGTGTATCCGGTTCATGGACCAGTGGATGAGGAGACCCAGGCTCTTTTG  
AGAAAGAAAGAAAAAGAGCCACTTCTTGGCCAGATCTTCTTGCCAAAGTTTTTAAGATT  
GATGTACGGGGAGATATTGACACAACCCACCCTACTCGTTTTTGTACAATTGTTGGAAA  
GTGATTCAAAGAAAAGTCAGCAATGCCCCCACGAAGCACATCTTCTAGGGAAAGACCCA  
GTGGAATGGCGGCCCCATTCAATGAGCTGTGACGTTTGTGTCACCTCCTTCGTGGAGTC  
AAGAGAAAGAAACCAATGCTGAATTCACAGCTGAGCAAAAACTCAGGATTATTGCTGGA  
CGTACGAGAAAATAACATGCATAAGAAAGGTAAAGCAACTGAAAAACAAAAGTTTAATG  
AAAAAGATTTCAAAGTAAAGCAATCCATCTCAGTACAAAATCCCTTGCAATAGATTAT  
CCTGTGGACTTTGTAAAGTCAATATCTTGCCAGATCTGTGAACACATCCTGTCCGATCCA  
GTAGAAACAACATGTAAGCACTTATTCTGTAGAGTCTGCATTCTTAAATGCCTTAAAGTA  
ATGGGAAGCTATTGCCATCCTGCCGATATCCTTGCTTTTCTACTGATCTAGTGAGTCT  
GTAAAATCCTTCCTAAACATCCTCAACAATTTGGTTTTGAGATGCCCAATAAAAGGCTGT  
CATGAGGATGTCTTTTTGAAAAATACTGCCAACATCGTTCTAATCATAAAGAGGCAGAA

AGC

>MZ712339\_ZMMUR14788\_[Pareas\_abros]

GACAGCCACCAGGCTAACTCTGCTAAAGAAAATGCAACAGGTTCTATGGACATCACTGAT  
GAACAACCTGAGGCAGCAGCTGTAATGTCACAAGTGCCCTTTGAAACAGGCACTGAGTTG  
AATAAAAATAGCTTGGCAAGAGAGAAAGATGTCTTTCACATGAGCCAAAGGGAGGTGGAA  
GCTCACCAAGCAAACCTGCAGTGCCTCTGTGCATCTGTGGAGGCTCACTGAAAAGTATGAT  
CCTTGCAAAAAGTGTATCCGGTTCATGGACCAGTGGATGAGGAGACCCAGGCTCTTTTG  
AGAAAGAAAGAAAAAGAGCCACTTCTTGGCCAGATCTTCTTGCCAAAGTTTTTAAGATT  
GATGTACGGGGAGATATTGACACAACCCACCCTACTCGTTTTTGTACAATTGTTGGAAA  
GTGATTCAAAGAAAAGTCAGCAATGCCCCCACGAAGCACATCTTCTAGGGAAAGACCCA

GTGGAATGGCGGCCCCATTCAATGAGCTGTGACGTTTGTGTCACCTTCCTTCGTGGAGTC  
AAGAGAAAGAAACCAATGCTGAATTCACAGCTGAGCAAAAACTCAGGATTATTGCTGGA  
CGTACGAGAAAAATAACATGCATAAGAAAGGTAAAGCAACTGAAAAACAAAAGTTTAATG  
AAAAAGATTTCAAACCTGTAAGCAAATCCATCTCAGTACAAAATCCCTTGCAATAGATTAT  
CCTGTGGACTTTGTAAAGTCAATATCTTGCCAGATCTGTGAACACATCCTGTCCGATCCA  
GTAGAAACAACATGTAAGCACTTATTCTGTAGAGTCTGCATTCTTAAATGCCTTAAAGTA  
ATGGGAAGCTATTGCCATCCTGCCGATATCCTTGCTTTTCTACTGATCTAGTGAGTCCT  
GTAAAATCCTTCCTAAACATCCTCAACAATTTGGTTTTGAGATGCCCAATAAAAGGCTGT  
CATGAGGATGTCTTTTTGGAAAAATACTGCCAACATCGTTCTAATCATAAAGAGGCAGAA  
AGC

>MZ712340\_ZMMUR13656\_[Pareas\_temporalis]

GACAGCCACCAGGCTAACTCTGCTAAAGAAAATGCAGCAGGTTCTATGGACATCACTGAT  
GAACAACCTGAGGCAGCAGCTGTAATGTCACAAGTGCCCTTTGAAACAGGCACTGAGTTG  
AATAAAAATAGCTTGGCAAGAGAGAAAGGTGTCTTTCACATGAGCCAAAGGGAGGTGGAA  
GCTCACCAAGCAAACCTGCAGTGCCTCTGTGCATCTGTGGAGGCTCACTGAAAACCTGAT  
CCTTGCAAAAAGTGCATCCAGTTCACGGACCAGTGGATGAGGAGACCCTGGCTCTTTTG  
AGAAAGAAAGAAAAAGAGCCACTTCTTGCCAGATCTTCTTGCCAAAGTTTTTAAGATT  
GATGTACGGGGAGATATTGACACAACCCACCCTACTCGTTTTTGTCACAATTGTTGGAAA  
GTGATTCAAAGAAAAGTCAGCAATGCCCCCATGAAGCACATCTTCTAGGGAAAGACCCA  
GTGGAATGGCGGCCCCATTCAATGAGCTGTGACGTTTGTGTCACCTTCCTTCGTGGAGTC  
AAGAGAAAGAAACCAATGCTGAATTCACAGCTGAGCAAAAACTCAGGATTATTGCTGGA  
CGTACGAGAAAAATAACATGCATAAGAAAGGTAAAGCAACTGAAAAACAAAAGTTTAATG  
AAAAAGATTTCAAACCTGTAAGCAAATCCATCTCAGTACAAAATCCCTTGCAATAGATTAT  
CCTGTGGACTTTGTAAAGTCAATATCTTGCCAGATCTGTGAACACATCCTGTCCGATCCA  
GTAGAAACAACATGTAAGCACTTATTCTGTAGAGTCTGCATTCTTAAATGCCTTAAAGTA  
ATGGGAAGCTATTGCCATCCTGCCGATATCCTTGCTTTTCTACTGATCTAGTGAGTCCT  
GTAAAATCCTTCCTAAACATCCTCAACAATTTGGTTTTGAGATGCCCAATAAAAGGCTGT  
CATGAGGATGTCTTTTTGGAAAAATACTGCCAACATCGTTCTAATCATAAAGAGGCAGAA  
AGC

>MZ712341\_SIEZC20215\_[Pareas\_temporalis]

GACAGCCACCAGGCTAACTCTGCTAAAGAAAATGCAGCAGGTTCTATGGACATCACTGAT  
GAACAACCTGAGGCAGCAGCTGTAATGTCACAAGTGCCCTTTGAAACAGGCACTGAGTTG  
AATAAAAATAGCTTGGCAAGAGAGAAAGGTGTCTTTCACATGAGCCAAAGGGAGGTGGAA  
GCTCACCAAGCAAACCTGCAGTGCCTCTGTGCGCATCTGTGGAGGCTCACTGAAAAGTATGAT  
CCTTGCAAAAAGTGTTCATCCAGTTCACGGACCAGTGGATGAGGAGACCCTGGCTCTTTTG  
AGAAAGAAAGAAAAAGAGCCACTTCTTGGCCAGATCTTCTTGCCAAAGTTTTTAAGATT  
GATGTACGGGGAGATATTGACACAACCCACCCTACTCGTTTTTGTCACAATTGTTGGAAA  
GTGATTCAAAGAAAAGTCAGCAATGCCCCCATGAAGCACATCTTCTAGGGAAAGACCCA  
GTGGAATGGCGGCCCCATTCAATGAGCTGTGACGTTTGTGTCACTTCCTTTCGTGGAGTC  
AAGAGAAAGAAACCAATGCTGAATTCACAGCTGAGCAAAAAACTCAGGATTATTGCTGGA  
CGTACGAGAAAAATAACATGCATAAGAAAGGTAAAGCAACTGAAAAACAAAAGTTTAATG  
AAAAAGATTTCAAAGTAAAGCAATCCATCTCAGTACAAAATCCCTTGCAATAGATTAT  
CCTGTGGACTTTGTAAAGTCAATATCTTGCCAGATCTGTGAACACATCCTGTCCGATCCA  
GTAGAAACAACATGTAAGCACTTATTCTGTAGAGTCTGCATTCTTAAATGCCTTAAAGTA  
ATGGGAAGCTATTGCCATCCTGCCGATATCCTTGCTTTTCTACTGATCTAGTGAGTCCT  
GTAAAATCCTTCTAAACATCCTCAACAATTTGGTTTTGAGATGCCCAATAAAAGGCTGT  
CATGAGGATGTCTTTTTGGAAAAATACTGCCAACATCGTTCTAATCATAAAGAGGCAGAA  
AGC

>MZ712342\_LSUHC9098\_[Asthenodipsas\_lasgalenensis]

GACAGCCACCAGGCTAACTCTGTTAAAGAAAATGCAACAGGTTGTCTGGACATCACTGAT  
GAGCAACCTAAGGCAGCAGCTGTAATGTCACAAGTGCCCTTTGTAACAGGCATCGAGATG  
AATAAAAATAGCTGGGCAAGAGAGAAAGATGTCTTTCACATGAGCCAAAGGGAGGTGGAA  
GCTCACCAAGCAAACCTGCAGTGCCTCTGTGCGCATCTGTGGAGACTCACTGAAAAGTATGAT  
CCTTGCAAACAGTGTTCATCCAGTCCACGGGCCAGTGGATGAGGAGACCCAGGCTCTTTTG  
AGAAAGAAAGAGAAAAGAGCCACTTCTTGGCCAGATCTTCTTGCCAAAGTTTTTAAGATT  
GATGTAAGGGAAGATATTGACACAACCCATCCTACTCGTTTTTGTCACAATTGTTGGAAA  
GTGATTCAAAGAAAAGTCAGCAATGCTCCCCATGAAGTACATCTTCTAGGGAAAGATCCA  
GTGGAGTGGCAGTCCATTCAACAAGCTGTGATGTTTGTGTCACTTCCTTTCGTGGAGTC

AAGAGAAAGAAACCAATGCTGAATTCACAGCTGAGCAAAAACTCAGGATTATTGCTGGA  
CGTACGAGAAAAATAAAATGCATAAGGAAGATAAAGCAACTGAAAAACAAAAGTTTAATG  
AAAAAGATTTCAAAGTAAAGCAAAATTCATCTCAGTATAAAAGCCCTTGCAATAGATTAT  
CCTGTGGACTTTGTAAAGTCAATCTCTTGCCAGATCTGTGAACACATCCTGTCTGATCCA  
GTAGAAACAACATGTAAACACTTATTCTGTAGAGTATGCATTCTTAAATGTCTTAAAGTA  
ATGGGAAGCTATTGCCATCCTGCCAGTATCCTTGCTTTCCTACTGATCTAGTGAGCCCT  
GTAAAATCCTTCTAAACATCCTTAACAATTTGGTTTTGAGATGCCCAATAAAAGGCTGT  
CATGAGGAGGTCTTTTTGGAAAAATACTGCCAACATCGTTCTAATCATAAAGACGCAGAA  
AGC

>MZ712343\_Avpt\_[Asthenodipsas\_vertebralis]

GACAGCCACCAGGCTAACTCTGTTAAAGAAAATGCAACAGGTTGTCTGGACATCACTGAT  
GAGCAACCTAAGGCAGCAGCTGTAATGTCACAAGTGCCCTTTGTAACAGGCATCGAGATG  
AATAAAAATAGCTGGGCAAGAGAGAAAGATGTCTTTCACATGAGCCAAAGGGAGGTGGAA  
GCTCACCAAGCAAACCTGCAGTGCCTCTGTGCATCTGTGGAGACTCACTGAAAAGTAT  
CCTTGCAAACAGTGTCCAGTCCACGGGCCAGTGGATGAGGAGACCCAGGCTCTTTTG  
AGAAAGAAAGAGAAAAGAGCCACTTCTTGCCAGATCTTCTTGCCAAAGTTTTTAAGATT  
GATGTAAGGGAAGATATTGACACAACCCATCCTACTCGTTTTTGTCACAATTGTTGGAAA  
GTGATTCAAAGAAAAGTCAGCAATGCTCCCATGAAGTACATCTTCTAGGGAAAGATCCA  
GTGGAGTGGCAGTCCATTCAACAAGCTGTGATGTTTGTGCACTTCCTTTTGTGGAGTC  
AAGAGAAAGAAACCAATGCTGAATTCACAGCTGAGCAAAAACTCAGGATTATTGCTGGA  
CGTACGAGAAAAATAAAATGCATAAGGAAGATAAAGCAACTGAAAAACAAAAGTTTAATG  
AAAAAGATTTCAAAGTAAAGCAAAATTCATCTCAGTATAAAAGCCCTTGCAATAGATTAT  
CCTGTGGACTTTGTAAAGTCAATCTCTTGCCAGATCTGTGAACACATCCTGTCTGATCCA  
GTAGAAACAACATGTAAACACTTATTCTGTAGAGTATGCATTCTTAAATGTCTTAAAGTA  
ATGGGAAGCTATTGCCATCCTGCCAGTATCCTTGCTTTCCTACTGATCTAGTGAGCCCT  
GTAAAATCCTTCTAAACATCCTTAACAATTTGGTTTTGAGATGCCCAATAAAAGGCTGT  
CATGAGGAGGTCTTTTTGGAAAAATACTGCCAACATCGTTCTAATCATAAAGACGCAGAA  
AGC
